# Supplementary material for: Complex refractive indices and single scattering albedo of global dustaerosols in the shortwave spectrum and relationship to iron content and size
Source: Copernicus journal article supplement (doi:10.5194/acp-2019-145), 2019-03-12
Supplement: Supplementary file [file acp-2019-145-AC2-supplement.pdf]

# Complex refractive indices and single scattering albedo of global dust aerosols in the shortwave spectrum and relationship to size and iron content and size

Claudia Di Biagio<sup>1</sup>, Paola Formenti<sup>1</sup>, Yves Balkanski<sup>2</sup>, Lorenzo Caponi<sup>1,3</sup>, Mathieu Cazaunau<sup>1</sup>, Edouard Pangui<sup>1</sup>, Emilie Journet<sup>1</sup>, Sophie Nowak<sup>4</sup>, Meinrat O. Andreae<sup>5,6</sup>, Konrad Kandler<sup>7</sup>, Thuraya Saeed<sup>8</sup>, Stuart Piketh<sup>9</sup>, David Seibert<sup>10</sup>, Earle Williams<sup>11</sup>, and Jean-Francois Doussin<sup>1</sup>

<sup>1</sup> *LISA, UMR CNRS 7583, Université Paris-Est-Créteil, Université de Paris, Institut Pierre Simon Laplace (IPSL), Créteil, France*

*Laboratoire Interuniversitaire des Systèmes Atmosphériques (LISA), UMR7583, CNRS, Université Paris Est Créteil et Université Paris Diderot, Institut Pierre et Simon Laplace, Créteil, France*

<sup>2</sup> *Laboratoire des Sciences du Climat et de l'Environnement, CEA CNRS UVSQ UP Saclay, 91191, Gif sur Yvette, France*

<sup>3</sup> *PM\_TEN srl, Piazza della Vittoria 7/14, 16121, Genoa, Italy*

<sup>4</sup> *Plateforme RX UFR de chimie, Université Paris Diderot, Paris, France*

<sup>5</sup> *Max Planck Institute for Chemistry, P.O. Box 3060, 55020, Mainz, Germany*  
*Biogeochemistry Department, Max Planck Institute for Chemistry, P.O. box 3060, 55020, Mainz, Germany*

<sup>6</sup> *Geology and Geophysics Department, King Saud University, Riyadh, Saudi Arabia*

<sup>7</sup> *Institut für Angewandte Geowissenschaften, Technische Universität Darmstadt, Schnittspahnstr. 9, 64287 Darmstadt, Germany*

<sup>8</sup> *Science Department, College of Basic Education, Public Authority for Applied Education and Training, Al-Ardeya, Kuwait*

<sup>9</sup> *Climatology Research Group, Unit for Environmental Science and Management, North-West University, Potchefstroom, South Africa*

<sup>10</sup> *Walden University, Minneapolis, Minnesota, USA*

<sup>11</sup> *Parsons Laboratory, Massachusetts Institute of Technology, Cambridge, Massachusetts, USA*

Correspondence to: C. Di Biagio ([claudia.dibiagio@lisa.u-pec.fr](mailto:claudia.dibiagio@lisa.u-pec.fr))

## Abstract

The optical properties of airborne mineral dust depend on its mineralogy, size distribution, and shape, and might vary between different source regions. To date, large differences in refractive index values found in the literature have not been fully explained. In this paper we present a new dataset of complex refractive indices ( $m=n-ik$ ) and single scattering albedos (SSA) for 19 mineral dust aerosols over the 370–950 nm range in dry conditions. Dust aerosols were generated from natural parent soils from eight source regions (Northern Africa, Sahel, Middle East, Eastern Asia, North and South America, Southern Africa, and Australia). The ysc were selected to represent the global scale variability of the dust mineralogy. Dust was re-suspended into a 4.2 m<sup>3</sup> smog chamber where its spectral shortwave scattering ( $\beta_{sca}$ ) and absorption ( $\beta_{abs}$ ) coefficients, number size distribution, and bulk composition were measured. The complex refractive index was estimated by Mie calculations combining optical and size data, while the spectral SSA was directly retrieved from  $\beta_{sca}$  and  $\beta_{abs}$  measurements. Dust is assumed to be spherical in the whole data treatment, which introduces a potential source of uncertainty. Our results show that the imaginary part of the refractive index ( $k$ ) and the SSA largely vary widely from sample to sample, with values for  $k$  in the range 0.0011 to 0.00988 at 370 nm, 0.0006 to 0.0048 at 520 nm, and 0.0003 to

46 0.002<sub>1</sub> at 950 nm, and values for SSA in the range 0.70 to 0.96 at 370 nm, 0.85 to 0.98 at 520 nm, and  
47 0.95 to 0.99 at 950 nm. In contrast, the real part of the refractive index (n) is mostly source (and wave-  
48 length) independent, with an average value between 1.48 and 1.55. The sample-to-sample variability  
49 in our dataset of k and SSA is mostly related to differences in the dust's iron content. In particular, a  
50 wavelength-dependent linear relationship is found between the magnitude of k and SSA and the mass  
51 concentrations of both iron oxide and total elemental iron, with iron oxide better correlated than total  
52 elemental iron to both k and SSA. As an intrinsic property of matter, The value of k was found to be  
53 independent of size. When the iron oxide content exceeds >3%, the SSA linearly decreases with in-  
54 creasing fraction of coarse particles at short wavelengths (< 600 nm).

55 Compared to the literature, our values for the real part of the refractive index and SSA are in line with  
56 past results, while we found lower values of k compared to most of the literature values currently used  
57 in climate models

58 We recommend that source-dependent values of the SW spectral refractive index and SSA are be used  
59 in models and remote sensing retrievals instead of generic values. In particular, the close relationships  
60 found between k or SSA and the iron content in dust enable establishing predictive rules for spectrally-  
61 resolved SW absorption based on particle composition.

62

## 63 Introduction

64 With teragram amounts of annual emissions, a residence time of about 1–2 weeks in the atmosphere,  
65 and a planetary-scale transport, mineral dust aerosols are a global phenomenon (Uno et al., 2009;  
66 Ginoux et al., 2012), and contribute significantly to the global and regional aerosol loading (Ridley et  
67 al., 2016) and direct radiative effect (Miller et al., 2014).

68 However, large uncertainties still persist on the magnitude and overall sign of the dust direct radiative  
69 effect (Boucher et al., 2013; Highwood and Ryder, 2014; Kok et al., 2017). One of the major sources of  
70 this uncertainty is our insufficient knowledge of the dust's absorption properties in the shortwave (SW)  
71 and longwave (LW) spectral ranges (e.g., Balkanski et al., 2007; Samset et al., 2018), given that mineral  
72 dust contains large particles and a variety of minerals absorbing over both spectral regions (e.g. iron  
73 oxides, clays, quartz and calcium-rich species; Sokolik and Toon, 1999; Lafon et al., 2006; Di Biagio  
74 et al., 2014a, b). Global and regional scale mapping of dust absorption remains limited and more infor-  
75 mation is required (Samset et al., 2018).

76 Aerosol absorption is represented both by the imaginary part (k) of the complex refractive index ( $m=n-ik$ )  
77 of its constituent material, and by the single scattering albedo (SSA, i.e., the ratio of the scattering  
78 to extinction coefficient) of the particle population, as well as by the mass absorption efficiency (MAE,  
79 units of  $m^2 g^{-1}$ ), i.e., the aerosol absorption coefficient per unit of aerosol mass concentration.

80 In the shortwave spectral range, absorption by dust accounts for up to ~10–20% of its total extinction.  
81 Dust absorption is highest in the UV–VIS, and almost nil towards the near IR (Cattrall et al., 2003;  
82 Redmond et al., 2010), due to the combined contribution of large particles in the size distribution and  
83 the dust's mineralogy, notably the presence of iron oxides (Karickhoff and Bailey, 1973; Lafon et al.,

84 2006; Derimian et al., 2008; Moosmüller et al., 2012; Formenti et al., 2014a; 2014b; Engelbrecht et al.,  
85 2016; Caponi et al., 2017). The mineralogy of airborne mineral dust varies according to that of the  
86 parent soils (Nickovic et al., 2012; Journet et al., 2014). Consequently, dust aerosols of different origins  
87 should be more or less absorbing in the SW, and have different imaginary spectral refractive index and  
88 SSA. Field and laboratory measurements, including ground-based and space-borne remote sensing,  
89 show that  $k$  varies at a regional scale by almost two orders of magnitude (0.0001–0.008 at 550 nm) with  
90 corresponding SSAs between 0.80 and 0.99 at 550 nm (Volz 1972; Patterson et al., 1977; Shettle and  
91 Fenn, 1979; Dubovik et al., 2002; Haywood et al., 2003; Sinyuk et al., 2003; Linke et al., 2006; Osborne  
92 et al., 2008; Müller et al., 2009; Otto et al., 2009; Petzold et al., 2009; Schladitz et al., 2009; McConnell  
93 et al., 2010; Formenti et al., 2011; Wagner et al., 2012; Ryder et al., 2013a; Engelbrecht et al., 2016;  
94 Rocha-Lima et al., 2018). Albeit some variability being instrumental or analytical (differences in the  
95 sampled size fraction or in the method used to retrieve optical parameters), geographic differences  
96 persist when the same measurement approach and retrieval method are applied, e.g., in AERONET  
97 inversions, supporting the dependence of dust  $k$  and SSA with location its origin (Dubovik et al., 2002;  
98 Koven and Fung, 2006; Su and Toon, 2011). In contrast, the real part ( $n$ ) of the dust refractive index,  
99 mostly related to particle scattering, is ~~estimated to be less variable than the imaginary part~~, with values  
100 between 1.47–1.56 at 550 nm (i.e.g., Volz, 1972; Patterson et al., 1977; Balkanski et al., 2007; Petzold  
101 et al., 2009).

102 Differences in  $k$  or SSA caused by the spatial variability of the iron content may affect the sign of the  
103 dust radiative effect (heating vs cooling) (Liao and Seinfeld, 1998; Claquin et al. 1999; Miller et al.,  
104 2014), and its global and regional implications (Myhre and Stordal, 2001; Colarco et al., 2014; Das et  
105 al., 2015; Jin et al., 2016; Bangalath and Stenchikov, 2016; Strong et al., 2018). ~~For instance, various~~  
106 ~~studies suggest that t~~he direct radiative effect of dust has a strong impact on the Western African  
107 Monsoon (Yoshioka et al., 2007; Konaré et al., 2008) and the Indian Summer Monsoon (Vinoj et al.,  
108 2014; Das et al., 2015; Jin et al., 2016). However, there is no consensus whether dust increases or  
109 decreases precipitation over these regions (Solmon et al., 2008; Jin et al., 2016; Strong et al., 2018).  
110 As an example, Solmon et al. (2008) indicate that dust reduces precipitation over most of the Sahelian  
111 region, but increases it over the Northern Sahel–Southern Sahara. This pattern is, however, very sen-  
112 sitive to the dust absorbing properties, and a decrease of few percent in dust absorption may even  
113 cancel out the increase of precipitation over the Sahel. Similarly, Jin et al. (2016) show that by varying  
114  $k$  from zero to 0.008 at 600 nm (i.e., the highest value currently used in models) the dust effect on the  
115 Indian Summer Monsoon may shift from negative (reduction of precipitation) to positive (increase of  
116 precipitation) values.

117 In spite of this sensitivity, present climate models adopt a globally-constant spectral complex refractive  
118 index (and SSA) for dust, and hence still implicitly assume the same dust mineralogical composition at  
119 the global scale. This is mainly due to the lack of a globally consistent dataset providing information of  
120 the geographical variability of the dust scattering and absorption properties (e.g., Sunset et al., 2018).  
121 Reference values for the refractive index are usually taken from Volz (1972), Patterson et al. (1977),  
122 D’Almeida et al. (1991), Shettle and Fenn (1979), Sokolik et al. (1993), Sinyuk et al. (2003), or OPAC  
123 (Hess et al., 1998; Koepke et al., 2015). A parameterization of the spectrally-resolved dust refractive

124 index as a function of the mineralogical composition of the particles is desirable to replace the globally  
125 constant values in current climate models, in particular for those models that started to incorporate the  
126 representation of dust mineralogy into their schemes (Scanza et al., 2015; Perlwitz et al., 2015a,  
127 2015b).

128 Improving our knowledge of the spectral SW refractive index of mineral dust and its relation to particle  
129 composition (~~henceforth~~ origin) is also key for the detection of dust aerosols in the atmosphere and  
130 the quantification of its mass loading, and total ~~and/or~~ absorption spectral optical depth from active and  
131 passive remote sensing (e.g., Ridley et al., 2016). As an example, the retrieval of the dust SSA and  
132 optical depth over bright desert surfaces with the MODIS (Moderate Imaging Resolution Spectroradi-  
133 ometer) Deep Blue algorithm (Hsu et al., 2004) applies the Critical Surface Reflectance Method (Kauf-  
134 man, 1987) to retrieve dust properties from measured Top of Atmosphere (TOA) spectral reflectance.  
135 This algorithm depends critically on a priori information on the spectral refractive index (Kaufman et al.,  
136 2001; Yoshida et al., 2013). Similarly, active remote sensing techniques (lidar, light detection and rang-  
137 ing) require the knowledge of the extinction-to-backscatter ratio (the lidar ratio), which is also a strong  
138 function of the complex index of refraction or SSA of the aerosol particles (e.g., Gasteiger et al., 2011;  
139 Shin et al., 2018). Gasteiger et al. (2011) have shown in fact that a 5% change in the SSA at 532 nm  
140 can modify by up to 20% the lidar ratio of dust, which means a 20% change in the estimated profile of  
141 the dust extinction coefficient and retrieved optical depth from lidar measurements.

142 In this paper we address these issues by reporting ~~the results~~ of a new laboratory investigation of the  
143 shortwave refractive index and SSA of dust from various source regions worldwide, in the framework  
144 of the RED-DUST project (Di Biagio et al., 2017a; hereafter DB17; Caponi et al., 2017; hereafter C17).  
145 Dust optical properties at discrete wavelengths between 370 and 950 nm are derived in conjunction  
146 with the particle elemental and mineralogical composition, including total elemental iron and iron oxides.  
147 We investigate the relationship of  $k$  and SSA to the iron content to provide a parameterization of the  
148 dust absorption as a function of its mineralogy, which can be applied to climate models. The depend-  
149 ence of dust absorption on the particle coarse size fraction is also investigated to evaluate the change  
150 of dust absorption with atmospheric transport time.

151

## 152 **2. Experimental set-up and instrumentation**

153 As previously described in DB17 and C17, ~~a~~All experiments discussed here and ~~previously described~~  
154 ~~in DB17 and C17~~ were conducted in the 4.2 m<sup>3</sup> stainless-steel CESAM chamber (French acronym for  
155 Experimental Multiphasic Atmospheric Simulation Chamber) (Wang et al., 2011). Mineral dust aerosols  
156 were generated by mechanical shaking of parent soils using about 15 g of soil sample (first sieved to  
157 <1000  $\mu\text{m}$  and then dried at 100 °C) placed in a 1 L Büchner flask and shaken for about 30 min at 100  
158 Hz by means of a sieve shaker (Retsch AS200). The dust suspension in the flask was injected into the  
159 chamber by flushing with N<sub>2</sub> at 10 L min<sup>-1</sup> for about 10–15 min. After injection in the chamber, the largest  
160 fraction of the dust aerosol (>1.5  $\mu\text{m}$  diameter) remained in suspension for approximately 60 to 120 min  
161 thanks to a four-blade stainless steel fan located at the bottom of the chamber, which also ensured  
162 homogeneous conditions within the chamber volume. The submicron dust fraction, instead, remained

163 constant with time during ~~the experiments (see Sect. 4.1.1), as shown in Fig. 3 reporting the timeline of~~  
164 ~~the measured effective dust fine diameter~~. The evolution of the physico-chemical and optical properties  
165 of the suspended dust was measured by different instruments connected to the chamber. The spectral  
166 particle volume dry scattering ( $\beta_{\text{sca}}$ ) and absorption ( $\beta_{\text{abs}}$ ) coefficients were measured, respectively, by  
167 a 3-wavelength nephelometer (TSI Inc. model 3563, operating at 450, 550, and 700 nm; 2 L min<sup>-1</sup> flow  
168 rate, 2-s time resolution) and a 7-wavelength aethalometer (Magee Sci. model AE31, operating at 370,  
169 470, 520, 590, 660, 880 and 950 nm; 2 L min<sup>-1</sup> flow rate, 2-min time resolution). The size distribution  
170 of aerosols was measured by means of a scanning mobility particle sizer (SMPS, TSI, DMA Model  
171 3080, CPC Model 3772; mobility diameter range 0.019–0.882  $\mu\text{m}$ ; 2.0/0.2 L min<sup>-1</sup> sheath-aerosol flow  
172 rates, 135-s time resolution), a WELAS optical particle counter (OPC) (PALAS, model 2000, white light  
173 source between 0.35 and 0.70  $\mu\text{m}$ ; optical-equivalent diameter range 0.58–40.7  $\mu\text{m}$ ; 2 L min<sup>-1</sup> flow  
174 rate, 1-min time resolution) and a SkyGrimm OPC (Grimm Inc., model 1.129, 0.655  $\mu\text{m}$  operating wave-  
175 length; optical-equivalent diameter range 0.25–32  $\mu\text{m}$ ; 1.2 L min<sup>-1</sup> flow rate, 6-s time resolution). Aer-  
176 osol elemental and mineralogical composition, including iron oxides, was derived by analysis of dust  
177 samples collected on polycarbonate filters (47-mm diameter Nuclepore, Whatman, nominal pore size  
178 0.4  $\mu\text{m}$ ) mounted on a custom-made stainless-steel sample holder (operated at 6 L min<sup>-1</sup>) for most of  
179 the duration of each experiment.

180 All instruments (size, SW optics, filters) sampled air from the chamber. To equalize the airflow extracted  
181 by the different instruments, a particle-free N<sub>2</sub>/O<sub>2</sub> mixture airflow was continuously injected into the  
182 chamber. Inlets for all extractive measurements consisted of a stainless steel tube located inside  
183 CESAM, and an external connection of silicone tubing (TSI Inc.) from the chamber to the instruments,  
184 for a total length varying between 0.4 and 1.2 m. As detailed in DB17 and shown in Fig. S1 in the  
185 supplement, the transmission efficiency due to aspiration and transmission in the sampling lines as a  
186 function of particle diameter was estimated to calculate the effective dust fraction sensed by each in-  
187 strument, taking into account the sampling flow rate, tubing diameter, tubing geometry, and particle  
188 shape and density. For the nephelometer and the aethalometer, the length of the sampling line from  
189 the intake point in the chamber to the instrument entrance was about 1.2 m, which resulted in a 50%  
190 cutoff of the transmission efficiency at 3.9  $\mu\text{m}$  particle geometric diameter and 100% cutoff at 10  $\mu\text{m}$ .  
191 For the filter sampling system, the length of the sampling line of about 0.5 m resulted in a 50% (100%)  
192 cutoff at 6.5  $\mu\text{m}$  (15  $\mu\text{m}$ ) particle geometric diameter (or 50% cutoff at 10.6  $\mu\text{m}$  aerodynamic diameter  
193 as indicated in C17, therefore compositional analyses refer to the PM<sub>10.6</sub> size fraction). For the WELAS,  
194 the only OPC considered for size distribution in the coarse fraction (see Sect. 2.2), the 50% (100%)  
195 cutoff was reached for particles of 5  $\mu\text{m}$  (8  $\mu\text{m}$ ) diameter.

196 All experiments were conducted at ambient temperature and relative humidity <2%. In addition to over-  
197 night evacuation, the chamber was manually cleaned between experiments to avoid contaminations  
198 from remaining dust. Background concentrations of aerosols in the chamber were less than 2.0  $\mu\text{g m}^{-3}$   
199 (that is 10<sup>2</sup> to 10<sup>5</sup> times smaller than the concentration of dust aerosols in suspension in the cham-  
200 ber during experiments)



201 A flowchart of the procedure used to treat and combine optical, size, and compositional data, and the  
202 algorithm for SSA and complex refractive index retrieval is shown in Fig. 1. Full details of data treatment  
203 for size distribution measurements and filter compositional data are provided in DB17 and C17, and in  
204 the following we only mention the main points of interest for the present paper. Full details on the data  
205 treatment of the SW optical data are provided in Sect. 2.1 and 3.

206 The optical and size datasets were acquired at different temporal resolutions and then averaged over  
207 compatible 10-min intervals, whereas the compositional data represent the experiment integral. The  
208 SSA and complex refractive index data were retrieved both at 10-min resolution and as experiment  
209 averages to relate them to both size and compositional data. Table 1 summarizes the uncertainties on  
210 the measured and derived parameters described in the following.

## 211 **2.1 SW optical measurements**

### 212 **2.1.1 Aerosol scattering coefficient**

213 The aerosol scattering coefficients ( $\beta_{\text{sca}}$ ) at 450, 550, and 700 nm are measured by the nephelometer  
214 at angles between  $7^\circ$  and  $170^\circ$  and need to be corrected for the restricted field-of-view of the instru-  
215 ment (truncation correction) to retrieve  $\beta_{\text{sca}}$  at  $0^\circ$ – $180^\circ$ . The truncation correction factor ( $C_{\text{trunc}}$ ), i.e., the  
216 ratio of the  $\beta_{\text{sca}}$  at  $0^\circ$ – $180^\circ$  and  $7^\circ$ – $170^\circ$ , was estimated by Mie calculations for homogeneous spherical  
217 particles using the size distribution measured simultaneously behind SW inlets (see Sect. 2.2). In the  
218 calculations, the real part of the complex refractive index of dust was assumed to be wavelength-inde-  
219 pendent and fixed at a value of 1.53, while the imaginary part was set to 0.003 at 450 and 550 nm and  
220 to 0.001 at 700 nm, according to pre-existing information (Sinyuk et al., 2003; Schladitz et al., 2009;  
221 Formenti et al., 2011; Rocha-Lima et al., 2018). For the different dust samples,  $C_{\text{trunc}}$  ranged between  
222 1.2 and 1.7 and decreased with wavelength and the dust residence time in the chamber, following the  
223 relative importance of the coarse component in the dust population (~~Anderson and Ogreen, 1998~~). The  
224 uncertainty on  $C_{\text{trunc}}$ , calculated by repeating the optical calculations by using the size distribution of  
225 dust within its error bars as input to the optical code, is less than  $\pm 5\%$  at all wavelengths (~~in the approx-~~  
226 ~~imation of Mie spherical and homogeneous particles.~~). In order to assess the consistency of the derived  
227 truncation correction, we made a sensitivity study in which we recalculated  $C_{\text{trunc}}$  by varying the refrac-  
228 tive index ~~at used as~~ input to ~~the~~ Mie calculations in the range of  $n$  and  $k$  values obtained in this study  
229 (i.e., values at the 10% and 90% percentile as reported in Table 5 for the whole dataset, that is  $n$   
230 between 1.49 and 1.54 and  $k$  between 0.001 and 0.006 at 450, 550, and 700 nm). The results of this  
231 sensitivity study indicate that, for fixed dust size distribution, the truncation correction  $C_{\text{trunc}}$  varies less  
232 than 1% for  $n$  between 1.49 and 1.54, and  $< 5\%$  for  $k$  between 0.001 and 0.006, and so that it is quite  
233 insensitive to the exact assumed  $n$  and  $k$  values.

234 Once corrected for truncation, the spectral  $\beta_{\text{sca}}$  was extrapolated at the aethalometer wavelengths. With  
235 this aim, the Scattering Ångström Exponents,  $\text{SAE}_{450-550}$  and  $\text{SAE}_{550-700}$ , were calculated as the linear  
236 fit of  $\beta_{\text{sca}}$  vs  $\lambda$  at 450–550 nm and 550–700 nm, respectively. The  $\text{SAE}_{450-550}$  and  $\text{SAE}_{550-700}$  coefficients  
237 were used to extrapolate  $\beta_{\text{sca}}$  at wavelengths respectively lower and higher than 550 nm. Extrapolated  
238  $\beta_{\text{sca}}$  values were used to derive an average SAE of dust for the entire investigated spectral range.

### 239 2.1.2 Aerosol absorption coefficient

240 The aerosol absorption coefficient ( $\beta_{\text{abs}}$ ) at 370, 470, 520, 590, 660, 880, and 950 nm was retrieved  
241 from aethalometer measurements. The aethalometer measures the attenuation (ATT) through an aer-  
242 osol-laden quartz filter, related to the spectral attenuation coefficient ( $\beta_{\text{ATT}}$ ) as:

$$243 \beta_{\text{ATT}}(\lambda) = \frac{\Delta \text{ATT}(\lambda) A}{\Delta t V} \quad (1)$$

244 where A is the area of the aerosol collection spot ( $0.5 \pm 0.1$ )  $\text{cm}^2$  and V the air sample flow rate (0.002  
245  $\text{m}^3 \text{min}^{-1}$ ). The slope  $\frac{\Delta \text{ATT}(\lambda)}{\Delta t}$  is the linear fit of the measured attenuation as a function of time calcu-  
246 lated over 10-min intervals. The spectral attenuation coefficient was converted into an absorption co-  
247 efficient  $\beta_{\text{abs}}$  following the formula by Collaud Coen et al. (2010):

$$248 \beta_{\text{abs}}(\lambda) = \frac{\beta_{\text{ATT}}(\lambda) - \alpha(\lambda)\beta_{\text{sca}}(\lambda)}{C_{\text{ref}}R(\lambda)} \quad (2)$$

249 The  $\alpha(\lambda)\beta_{\text{sca}}(\lambda)$  term accounts for the fraction of the measured attenuation due to side and backward  
250 scattering and not to light absorption. The Collaud–Coen correction scheme has been recently shown  
251 to yield quite accurate values of the absorption coefficients and absorption Ångström exponents from  
252 aethalometer data (Saturno et al., 2017). The value of  $\alpha(\lambda)$  was calculated with the formula by Arnott et  
253 al. (2005) and varied between 0.002 and 0.02 ( $< \pm 1\%$  from formal error propagation on the Arnott for-  
254 mula), while  $\beta_{\text{sca}}(\lambda)$  is the scattering coefficient from the nephelometer extrapolated to the aethalometer  
255 wavelengths.  $C_{\text{ref}}$  accounts for multiple scattering by the filter fibers, aerosol laden or not. Its spectral  
256 value, obtained by the linear extrapolation of  $C_{\text{ref}}$  at 450 and 660 nm estimated for mineral dust by Di  
257 Biagio et al. (2017b), varied between 4.30 at 370 nm ~~to~~ and 3.32 at 950 nm. We assume for the extrap-  
258 olated  $C_{\text{ref}}$  an uncertainty of  $\pm 10\%$  as estimated in Di Biagio et al. (2017b). The correction factor, R,  
259 accounts for the decrease in the aethalometer sensitivity with the increase of the aerosol filter loading.  
260 The value of R depends on the absorptivity properties of the sampled aerosol and can be calculated as  
261 a function of the particle SSA. In this study, we calculated R by estimating a first-guess  $\text{SSA}^*$  as the  
262 ratio of the nephelometer ~~corrected~~  $\beta_{\text{sca}}$  and  $\beta_{\text{ext}}$  obtained as the sum of  $\beta_{\text{sca}}$  and the  $\beta_{\text{abs}}$  non-corrected  
263 for filter loading effect. The R was estimated by using the Collaud–Coen et al. (2010) formulation. For  
264 the range of estimated  $\text{SSA}^*$  (about 0.60 to 0.99), R varied between 0.5 and 1.0 ( $\pm 1-10\%$ ).

265 The Absorption Ångstrom Exponent (AAE) was calculated as the power-law fit of  $\beta_{\text{abs}}$  versus  $\lambda$ .

266 Due to an instrumental problem, aethalometer data were not always available, with a typical 30-min  
267 interruption usually 10 to 30 minutes after the beginning of experiments.

### 268 2.2 Size distribution

269 The aerosol number size distribution was obtained from SMPS, WELAS and SkyGrimm measurements  
270 over different diameter ranges. The measured electrical mobility and optical equivalent diameters from  
271 the SMPS and the OPCs were first converted into geometrical diameters ( $D_g$ ) as described in DB17  
272 and summarized in Table 1. The OPCs conversion assumes ~~for dust~~ a dust complex refractive index

273 that in our study was set in the range 1.47–1.53 for  $n$  and 0.001–0.005 for  $k$  for both the SkyGrimm and  
 274 the WELAS (following DB17, [for more details see Table 1](#)). After conversion, the estimated  $D_g$  range  
 275 was 0.01–0.50  $\mu\text{m}$  for the SMPS, 0.65–73.0  $\mu\text{m}$  for the WELAS, and 0.29–68.2  $\mu\text{m}$  for the SkyGrimm.  
 276 Due to a calibration issue, data for the SkyGrimm in the range  $D_g > 1\mu\text{m}$  were discarded, so that the  
 277 WELAS is the only instrument considered in the super-micron range. A very low counting efficiency  
 278 was observed for the WELAS below 1  $\mu\text{m}$  and data in this size range were also discarded.

279

280 The SMPS, WELAS, and SkyGrimm data were combined, as detailed in DB17, to obtain the full size  
 281 distribution of the dust aerosols suspended in the CESAM chamber,  $(dN/d\log D_g)_{\text{CESAM}}$ , and the size  
 282 distribution behind SW optical instruments inlets,  $(dN/d\log D_g)_{\text{SWoptics}}$ , after taking into account particle  
 283 losses along sampling lines (see Supplementary material and Fig. S1). As previously discussed, due  
 284 to the particle losses in the sampling line from the chamber to the nephelometer/aethalometer, the  
 285  $(dN/d\log D_g)_{\text{SWoptics}}$  size distribution is cut at 10  ~~$\mu\text{m}$~~ [microns](#), so no particles above this diameter reach  
 286 the SW instruments.

287 The measured size distributions,  $(dN/d\log D_g)_{\text{CESAM}}$  and  $dN/d\log D_g)_{\text{SWoptics}}$ , were used to estimate the  
 288 mass concentration of aerosols and their effective diameter ( $D_{\text{eff}}$ ) in the CESAM chamber and behind  
 289 the SW instrument inlets as:

290 
$$\text{Mass concentration} = \int \frac{\pi}{6} D_g^3 \frac{dN}{d\log D_g} \rho \cdot d\log D_g \quad (3)$$

291 
$$D_{\text{eff}} = \frac{\int D_g^3 \frac{dN}{d\log D_g} d\log D_g}{\int D_g^2 \frac{dN}{d\log D_g} d\log D_g} \quad (4)$$

292 The effective dust density  $\rho$  in Eq. (3) was set at 2.5  $\text{g cm}^{-3}$ , a value that is approximately in the middle  
 293 of the range of desert dust densities reported in the literature, i.e., 2.1–2.75  $\text{g cm}^{-3}$  (Maring et al., 2000;  
 294 Iwasaka et al., 2003; Reid et al., 2003). The effective diameter was evaluated separately for the fine  
 295 and coarse fractions of dust by integrating Eq. (4) for diameters  $\leq 1\mu\text{m}$  ( $D_{\text{eff, fine}}$ ) and  $>1\mu\text{m}$  ( $D_{\text{eff, coarse}}$ ),  
 296 respectively. [For  \$D\_{\text{eff, coarse}}\$  the upper limit of the calculation is 10  \$\mu\text{m}\$  when calculated from](#)  
 297 [\( \$dN/d\log D\_g\)\_{\text{SWoptics}}\$ , i.e. measured behind the SW inlets.](#)

298 The dust size distribution,  $(dN/d\log D)_{\text{SWoptics}}$ , measured at each 10-min time step for each sample was  
 299 fitted with a sum of five lognormal functions [to smooth data inhomogeneities linked to the different](#)  
 300 [instrument's operating principles and artefacts. Fitting was performed using the Levenberg–Marquardt](#)  
 301 [algorithm](#). For each mode, the parameters of the lognormal functions, i.e., the total number concentra-  
 302 tion ( $N_i$ ), the geometric median diameter ( $D_{g,i}$ ), and the geometric standard deviation of the distribution  
 303 ( $\sigma_i$ ), were retrieved. The uncertainties in the retrieved parameters were estimated by repeating the fit  
 304 using size data within their uncertainties. The resulting parameters of the fits at the peak of the injection  
 305 in the chamber are reported in Table S1, and an example of size fitting is shown in Fig. S2.



306 The procedure described here to estimate  $(dN/d\log D_g)_{\text{CESAM}}$  and  $(dN/d\log D_g)_{\text{SWoptics}}$  implies that as-  
307 sumptions are made on the values of  $n$  and  $k$  to correct OPCs data, and this may introduce a circularity  
308 in the estimates of the refractive index of dust that use  $(dN/d\log D_g)_{\text{SWoptics}}$  as input in optical calculations  
309 (see Sect. 3.2). In order to analyze the dependence of the results on this assumption, we made a  
310 sensitivity calculation by varying the values of  $n$  and  $k$  used for OPCs corrections within the range of  
311 values retrieved in this study (10% and 90% percentiles in Table 5, i.e., 1.49–1.54 for  $n$  and 0.001–  
312 0.006 for  $k$ ). We concluded that changing  $n$  and  $k$  in this range has a very low impact on the retrieved  
313 number size distribution behind the SW inlets  $(dN/d\log D_g)_{\text{SWoptics}}$  compared to the original assumptions  
314 made in our calculations (<5% changes in the retrieved size number distribution at the different diame-  
315 ters between the original correction and the correction by varying  $n$  and  $k$ ). This is due to the fact that  
316 when changing  $D_g$  due to changes in the  $n$  and  $k$  in the OPCs correction, the loss function also modifies  
317 to values corresponding to the new  $D_g$ . Given that the loss function increases/decreases for increas-  
318 ing/decreasing  $D_g$ , the combined changes in  $D_g$  and the loss function compensate so that the net num-  
319 ber concentration behind the SW inlets varies less than a few percent. These results therefore suggest  
320 that the procedure to estimate the complex refractive index of dust is nearly independent of the assumed  
321 OPC correction.

322 Other sources of uncertainties are linked to the spherical assumption to perform the optical to geomet-  
323 rical diameter conversion (discussed in Sect. 3.3) as well as those due to Mie resonance oscillations of  
324 the calculated scattering intensities. Concerning Mie resonances, a sensitivity study was performed  
325 varying the size resolution of our calculations (high/low diameter resolution in the calculations to have  
326 a better/worse reproduction of Mie resonance oscillations) and show that Mie resonances impact the  
327 optical to geometrical correction by less than 1%.

### 328 **2.3 Dust elemental and mineralogical composition and iron content**

329 The elemental and mineralogical composition of the dust aerosols in the  $\text{PM}_{10.6}$  size fraction was esti-  
330 mated by combining different techniques: X-ray diffraction (XRD, Panalytical model Empyrean diffrac-  
331 tometer) to estimate the particles' mineralogical composition in terms of clays, quartz, calcite, dolomite,  
332 gypsum, and feldspars; wavelength dispersive X-ray fluorescence (WD-XRF, Panalytical PW-2404  
333 spectrometer) to determine the dust elemental composition (Na, Mg, Al, Si, P, K, Ca, Ti, Fe); and X-  
334 ray absorption near-edge structure (XANES) to retrieve the content of iron oxides and their speciation  
335 between hematite and goethite. The dust mass collected on Nuclepore filters during the experiments  
336 varied between 0.3 and 6 mg m<sup>-3</sup> as calculated from elemental concentrations according to Lide (1992).

337 Full details on the XRD, WD-XRF, and XANES measurements and data analysis are provided in DB17  
338 and C17. In this study, we discuss the dust elemental iron mass concentration,  $\text{MC}_{\text{Fe}\%}$ , i.e., the percent  
339 mass of elemental iron with respect to the total dust mass concentration, and the iron oxides mass  
340 concentration,  $\text{MC}_{\text{Fe-ox}\%}$ , i.e., the percent mass fraction of iron oxides with respect to the total dust mass  
341 concentration, estimated as the sum of goethite ( $\text{MC}_{\text{Goet}\%}$ ) and hematite ( $\text{MC}_{\text{Hem}\%}$ ) species.

### 342 **3. Strategy for data analysis**

343 **3.1 Calculation of the spectral extinction coefficient and SSA from scattering and absorption**  
344 **coefficients**

345 The spectral scattering and absorption coefficients,  $\beta_{\text{sca}}(\lambda)$  and  $\beta_{\text{abs}}(\lambda)$ , measured by the nephelometer  
346 and the aethalometer were used to estimate 10-min averages of the spectral extinction coefficient,  $\beta_{\text{ext}}$   
347 ( $\lambda$ ), at the 7- $\lambda$  of the aethalometer between 370 and 950 nm as:

348 
$$\beta_{\text{ext}}(\lambda) = \beta_{\text{abs}}(\lambda) + \beta_{\text{sca}}(\lambda) \quad (5).$$

349 The Extinction Ångström Exponent (EAE) was calculated as the power-law fit of  $\beta_{\text{ext}}$  versus  $\lambda$ .

350 The spectral single scattering albedo of dust at 10-min resolution ( $\text{SSA}_{10\text{-min}}$ ) was retrieved as:

351 
$$\text{SSA}_{10\text{-min}}(\lambda) = \frac{\beta_{\text{sca}}(\lambda)}{\beta_{\text{ext}}(\lambda)} \quad (6).$$

352 The experiment-averaged SSA ( $\lambda$ ) was calculated for each soil type based on the following formula  
353 (Moosmüller et al., 2012):

354 
$$\text{SSA}(\lambda) = \left( 1 + \frac{1}{m(\lambda)} \right)^{-1} \quad (7)$$

355 where  $m(\lambda)$  represents the slope of the linear fit between the 10-min averages of  $\beta_{\text{sca}}(\lambda)$  and  $\beta_{\text{abs}}(\lambda)$   
356 measured along the whole duration of each experiment. An example of  $\beta_{\text{sca}}(\lambda)$  versus  $\beta_{\text{abs}}(\lambda)$  fitting to  
357 retrieve the spectral SSA is shown in Fig. S3 in the Supplement. The correlation coefficient  $R^2$  of the  
358  $\beta_{\text{sca}}$  versus  $\beta_{\text{abs}}$  fit usually ranges between 0.97 and 1 at all wavelengths. As will be discussed later in  
359 the paper, the single scattering albedo of dust depends on the particle coarse size fraction, and during  
360 our experiments  $\text{SSA}_{10\text{-min}}$  was not derived continuously for the different samples due to the aethalom-  
361 eter measurement interruptions. The application of Eq. (7) avoids any bias in the calculated averaged  
362 SSA for different soils due to size effects. For two of the analyzed samples (Tunisia and Namib-2),  
363 however, the linear fitting procedure was not applicable due to the fact that, respectively, only two and  
364 one absorption measurements from the aethalometer were available just after the peak of the injection,  
365 with no data afterwards. Average SSA data for Tunisia were thus estimated as the mean of the two  
366 available  $\text{SSA}_{10\text{-min}}$  data points, while the single  $\text{SSA}_{10\text{-min}}$  measurement at the peak of the injection was  
367 reported for Namib-2. This difference in time sampling should be kept in mind when comparing SSA  
368 data for these two samples to the rest of the dataset.

369 **3.2 Retrieval of the spectral complex refractive index**

370 An optical calculation was performed to estimate the complex refractive index ( $m=n-ik$ ) of dust aerosols  
371 based on optical and size data. The retrieval algorithm consisted in recalculating the spectral scattering  
372  $\beta_{\text{sca}}(\lambda)$  and absorption  $\beta_{\text{abs}}(\lambda)$  coefficients measured at each 10-min interval by using the fitted  
373  $(dN/d\log D)_{\text{SWoptics}}$  size distribution as input and by varying the real and imaginary parts of the complex  
374 refractive index in the calculations until the best agreement between measurements and calculations  
375 was found. At each wavelength the root mean square deviation (RMSD) was calculated as:

$$\begin{aligned}
376 \quad \text{RMSD}(\lambda) &= \sqrt{\left[ \frac{\beta_{\text{sca,measured}}(\lambda) - \beta_{\text{sca,calculated}}(\lambda)(n, k)}{\beta_{\text{sca,calculated}}(\lambda)(n, k)} \right]^2 + \left[ \frac{\beta_{\text{abs,measured}}(\lambda) - \beta_{\text{abs,calculated}}(\lambda)(n, k)}{\beta_{\text{abs,calculated}}(\lambda)(n, k)} \right]^2} \\
377 & \quad (8)
\end{aligned}$$

378 The RMSD was minimized at each wavelength to obtain n–k pairs that most closely reproduce the  
379 measured scattering and absorption coefficients. Optical calculations were performed at the 7 wave-  
380 lengths of the aethalometer between 370 and 950 nm using Mie theory ~~for homogeneous spherical~~  
381 ~~particles~~. In the calculations, the real part of the refractive index was varied in the range 1.40–1.60 at  
382 steps of 0.01, while the imaginary part was varied in the range 0.0001–0.050 at steps of 0.0001. For  
383 each sample, this resulted in 10500 computations per wavelength and per 10–min time step. The un-  
384 certainty on the real and imaginary parts of the refractive index was estimated with a sensitivity study.  
385 For this purpose, the values of n and k were also obtained by using as input the observed  $\beta_{\text{sca}}(\lambda)$ ,  $\beta_{\text{abs}}$   
386  $(\lambda)$ , and  $(dN/d\log D)_{\text{SWoptics}}$ , plus or minus one standard deviation on their measurement. The deviations  
387 of the values of n and k retrieved in the sensitivity study with respect to those obtained in the first  
388 inversions were assumed to correspond to the one standard deviation uncertainty of 10–min retrieved  
389 values.

390 Experiment–averaged values of the spectral n and k were estimated as the average of single n and k  
391 values retrieved at 10–min steps (indicated as  $n_{10\text{-min}}$  and  $k_{10\text{-min}}$ ). In fact, differently from the SSA, the  
392 refractive index did not seem to depend on the particle coarse size fraction (Sect. 4.5).

393 A control experiment was performed with submicron ammonium sulphate aerosols (see DB17 and sup-  
394plementary Fig. S4) with the aim of validating the proposed methodology to estimate the aerosol com-  
395plex refractive index for a non–absorbing aerosol type. For ammonium sulphate particles with a mono-  
396modal size distribution centered at 0.06  $\mu\text{m}$ , as measured with the SMPS, the retrieved real part of the  
397refractive index was 1.56 ( $\pm 0.01$ ) in the 450–700 nm wavelength range, as expected from literature  
398(Toon et al., 1976; Flores et al., 2009; Denjean et al., 2014).

### 399 **3.3 Assumptions on the retrieval of SSA and complex refractive index**

400 The approach used to retrieve the SSA and the complex refractive index of dust and the accuracy of  
401 the results depend on the accuracy of the input data and the assumptions in the optical calculations.  
402 We discuss here two points of the applied procedure, in part already mentioned in the previous para-  
403 graphs.

404 1/ The size distribution from OPCs and also the scattering coefficient from the nephelometer used as  
405 input to the n and k retrieval procedure and SSA calculation depend more or less directly on the dust  
406 refractive index. These instruments need in fact to be corrected for instrumental artefacts and these  
407 corrections require an a priori knowledge of the n and k, which in our approach were set to fixed values  
408 (1.47–1.53 for n and 0.001–0.005 for k for OPCs optical to geometrical diameter conversion, and 1.53  
409 for n and 0.001–0.003 for k for nephelometer truncation correction). This choice may in principle intro-  
410 duce a certain degree of uncertainty and circularity into the derived n, k, and SSA for dust. Nonetheless,  
411 we note that the range of refractive index values used to correct OPCs and nephelometer data falls in

412 the range of variability of the refractive index values obtained in this study (see Sect. 4.3), which sug-  
413 gests that the values used for the corrections are appropriate. Additionally, as previously discussed,  
414 both the size distribution ( $dN/d\log D_g$ )<sub>SWoptics</sub> and the scattering coefficient are not very sensitive to the  
415 assumptions about  $n$  and  $k$  used for the calculations (less than 5% changes in both the number size  
416 distribution behind SW inlets and the scattering coefficient from changing  $n$  and  $k$  within the range of  
417 estimated values in this study) which further demonstrates the robustness of the proposed approach.

418 2/ The retrieval procedure for  $n$  and  $k$ , as well as the calculations for OPCs optical-to-geometrical  
419 diameter and the nephelometer truncation correction, simplifies the non-spherical heterogeneous dust  
420 aerosols (e.g., Chou et al. 2008; Okada et al., 2011; Nousiainen and Kandler, 2015) into homogeneous  
421 spherical particles that can be represented by Mie theory. In the present study, we decided not to use  
422 a more advanced shape-representing theory for three main reasons. First, the spherical model has  
423 been shown to produce only moderate errors when computing angular-integrated quantities  
424 (Mishchenko et al., 1995; Otto et al., 2009; Sorribas et al., 2015) such as those we calculate in this  
425 study to retrieve the OPC and truncation corrections and for  $n$  and  $k$  retrieval. For instance, Sorribas et  
426 al. (2015) showed that using a spheroidal model has a negligible effect on the truncation correction.  
427 These authors estimated that using a spheroidal model permits to improve by 4 to 13% the agreement  
428 between modelled and measured spectral scattering coefficient at 450–700 nm but only for supermicron  
429 particles. Conversely, for submicron dust the spherical approximation is better suited than the spheroi-  
430 dal model to reproduce the scattering coefficients by the nephelometer. The study by Mogili et al. (2007)  
431 also found an excellent agreement between measured shortwave extinction spectra and those calcu-  
432 lated from Mie theory simulations for dust minerals, supporting the use of Mie theory for dust optical  
433 modelling. On the other side, other studies point to the need of a non-spherical assumption to improve  
434 the modelling of dust optical properties (e.g., Otto et al., 2009). Second, we used Mie theory for the  
435 sake of comparison with the large majority of previous field and laboratory data published so far, which  
436 had used calculations with the spherical approximation Third, given that the shape distribution and  
437 morphology of the dust samples was not measured during experiments, I. Improper assumptions on  
438 the particle shape and morphology may in fact induce even larger errors than using Mie theory, in  
439 particular for super-micron aerosols (Kalashnikova and Sokolik, 2004; Nousiainen and Kandler, 2015).  
440 It should be pointed out, however, that dust is usually assumed to be spherical in global climate models  
441 (e.g., Myhre and Stordal, 2001; Balkanski et al., 2007; Jin et al., 2016), and different studies still show  
442 contrasting results on the true impact of dust non-sphericity on radiative fluxes and heating rates  
443 from global model simulations (Mishchenko et al., 1995; Yi et al., 2011; Räisänen et al., 2012; Colarco  
444 et al., 2014). On the other hand, shape effects can be important for the retrieval of aerosol properties  
445 from remote sensing techniques using spectral, angular, and polarized reflectance measurements (e.g.,  
446 Feng et al., 2009). In synthesis, accounting for shape effects is still controversial for dust modelling and  
447 also a complex issue beyond the scope of this paper. Thus, while we acknowledge the potential uncer-  
448 tainties induced by spherical assumptions in our study, we do not quantify here the overall impact of  
449 this assumption on our results.

#### 450 **4. Results**

451

452 Nineteen soil samples from different desert areas in Northern Africa, Sahel, Eastern Africa and the  
453 Middle East, Central Asia, Eastern Asia, North America, South America, Southern Africa, and Australia  
454 were selected for experiments from a collection of 137 soil samples from source areas worldwide. The  
455 main information on the provenance of these soils is provided in Table 2. The nineteen selected soils,  
456 the same as analyzed in DB17, represent the major dust source regions depicted in Ginoux et al. (2012).  
457 Amongst the database of 137 samples from all the world regions that constitute significant dust emitters,  
458 this range in mineralogical composition represents the largest variability in iron oxides contents that can  
459 be found worldwide. This is illustrated in Fig. 2 where we represent the variability of hematite and goe-  
460 thite content in the nineteen selected soils and compare it with the range of variability of the global  
461 desert soils from the database of Journet et al. (2014).

#### 462 4.1 Physical and chemical properties of analysed dust samples

##### 463 4.1.1 Dust mass concentration and size distribution

464 Figure 3 shows a typical example of a time series of aerosol mass concentration and effective fine and  
465 coarse diameters measured inside the CESAM chamber and behind the SW instruments inlets during  
466 the experiments, as well as the corresponding  $\beta_{\text{sca}}$  and  $\beta_{\text{abs}}$  at 370 nm. The Figure shows the rapid  
467 increase of the mass concentration within CESAM during dust injection in the chamber, and its subse-  
468 quent decrease during the experiments due to both size-selective gravitational settling, occurring  
469 mostly within the first 30 min of experiments, and dilution by sampling. The scattering and absorption  
470 coefficients of dust decrease with time after injection in tandem with the decrease of the mass concen-  
471 tration and the size-dependent depletion in the chamber. The dust mass concentration inside CESAM  
472 at the peak of the injection is between 2 mg m<sup>-3</sup> (Mali) and 310 mg m<sup>-3</sup> (Bodélé) and falls to values  
473 between 0.9 mg m<sup>-3</sup> (Mali) and 20 mg m<sup>-3</sup> (Bodélé) behind the SW instruments inlets. These values  
474 are comparable to those measured close to sources during dust storms (Rajot et al., 2008; Kander et  
475 al., 2009). After a 2-hours experiment, the dust mass concentration has decreased to values of 0.2 to  
476 2.5 mg m<sup>-3</sup> (inside CESAM) and of 0.1 to 1.9 mg m<sup>-3</sup> (behind the SW inlets), within a range of values  
477 comparable to what has been measured as after medium- to long-range dust transport in the real at-  
478 mosphere (Weinzerl et al., 2011; Denjean et al., 2016b). The ise data therefore indicates s that in a 2-  
479 hour experiment in CESAM it is possible to reproduce the temporal changes of the dust mass load  
480 observed in the real atmosphere for dust from its emission to medium/long-range transporta receptor  
481 site.

482 Concurrently with As the mass concentration, the effective diameter of the coarse fraction,  $D_{\text{eff,coarse}}$ , of  
483 the coarse fraction of the dust aerosol also rapidly decreases with time due the progressive deposition  
484 of the coarsest particles in the chamber. For the different analyzed various soils,  $D_{\text{eff,coarse}}$  varies in the  
485 range of 4–8  $\mu\text{m}$  (peak of injection) to 3–4  $\mu\text{m}$  (after 2 hours) inside the CESAM chamber, and in the  
486 range of 3–4  $\mu\text{m}$  (peak of injection) to 2–3  $\mu\text{m}$  (after 2 hours) behind the SW inlets. In contrast,  $D_{\text{eff,fine}}$   
487 remains quite constant during the experiments, with a value between 0.6 and 0.7  $\mu\text{m}$  for all soils. The  
488 values of  $D_{\text{eff,coarse}}$  obtained in this study inside the CESAM chamber are in line with those measured  
489 close to African sources (4–12  $\mu\text{m}$ , Rajot et al., 2008; Weinzerl et al., 2009; Ryder et al., 2013a) and  
490 for dust transported across the Mediterranean (5–8  $\mu\text{m}$ , Denjean et al., 2016a). Conversely, the values

491 of  $D_{\text{eff,coarse}}$  behind the SW instruments inlets are mostly in agreement with those reported for dust trans-  
492 ported at Cape Verde and across the Atlantic ocean ( $\sim 3 \mu\text{m}$ , Maring et al., 2003; Müller et al., 2011;  
493 Denjean et al., 2016b). Our values of  $D_{\text{eff,fine}}$  are higher compared to values reported by Denjean et al.  
494 (2016a) for dust aerosols transported over the Mediterranean (0.2 to 0.5  $\mu\text{m}$ ), reflecting the fact that  
495 we analyse pure dust whereas these authors often encountered dust externally mixed with pollution  
496 particles.

497 The comparison of  $D_{\text{eff,coarse}}$  values suggests that while the size of dust distribution in CESAM is mostly  
498 representative of dust close to sources, ~~(see as already pointed out in DB17)~~, the size measured behind  
499 the SW instruments inlets is mostly representative of transport conditions. Figure 4 illustrates this point  
500 by showing the volume size distributions of the generated dust aerosols at the peak of injection seen  
501 by the SW optical instruments, compared to the average size of dust measured in CESAM (DB17) and  
502 field observations close to sources (e.g., Niger) and after long-range transport (Cape Verde, Suriname,  
503 ~~and~~ Puerto Rico, and Barbados). The size distribution of dust inside CESAM includes a coarse mode  
504 up to  $\sim 50 \mu\text{m}$  tenths of micrometres and well reproduces field observations close to sources, as shown  
505 in comparison to the Niger case. Due to particle losses along tubes, ~~the coarsest~~ particles above  $10 \mu\text{m}$   
506 diameter are not seen by the SW instruments. The overall shape of the dust size distribution sensed by  
507 the SW instruments is comparable to that measured during-after atmospheric long-range transport,  
508 even if the fraction of particles above 3.9  $\mu\text{m}$  diameter, which is at the 50% cutoff of the  
509 transmission efficiency for the SW optical instruments, is significantly under-represented compared to  
510 observations- (i.e., Betzer et al., 1988; Formenti et al., 2001; Maring et al., 2003; Ryder et al., 2013b,  
511 2018; Jeong et al., 2014; Denjean et al., 2016b). It should be keep in mind that often also field data are  
512 affected by inlet restrictions so that they cannot measure the whole coarse dust fraction (see Table 1 in  
513 Ryder et al., 2018). The lowest cutoff for field data shown in Fig. 4 are for the NAMMA and PRIDE  
514 datasets and correspond to upper size limits at 5 and 10  $\mu\text{m}$  in diameter, respectively. Being these  
515 values above our cutoff of 3.9  $\mu\text{m}$ , it means that the comparison with our size dataset is meaningful  
516 within the range of our measurements. To note that only the data from AER-D did not suffer from  
517 significant inlet restrictions thus leading to the observation of giant dust particles up to tens of microns  
518 in the Saharan Air Layer off the coasts of Western Africa.

#### 519 **4.1.2 Iron and iron oxide dust content**

520 Elemental iron includes the iron in the form of iron oxides and hydroxides, i.e. hematite and goethite  
521 (the so-called free iron, mostly controlling SW absorption) and the iron incorporated in the crystal struc-  
522 ture of silicates and aluminosilicates (illite, smectite), which does not substantially contribute to SW  
523 absorption (Karickhoff and Bailey, 1973; Lafon et al., 2004). The mass concentrations of these compo-  
524 nents (total iron oxides, hematite, goethite, and total elemental iron) for the different analysed samples  
525 are reported in Table 3. There is a considerable variability in the iron and iron oxide content for our  
526 samples. Total iron in the dust samples is in the range from 2.4% (Namib-1) to 10.6% (AustraliaNamib-  
527 2). Iron oxides account for 11% ~~and to~~ 62% of the iron mass (calculated following C17, not reported in  
528 Table 3), whereas the percent of iron oxides to the total dust mass varies between 0.7% (Bodélé De-  
529 pression) and 5.8% (Niger). These data are in the range of values reported in the literature (Reid et al.,



530 2003; Scheuvens et al., 2013; Formenti et al., 2011, 2014a). For the samples from the Sahara and the  
531 Sahel, goethite is the dominant iron oxide species, in agreement with Lafon et al. (2006) and Formenti  
532 et al. (2014a; 2014b). ~~In contrast, over other regions~~ Elsewhere, hematite dominates over goethite, as  
533 ~~already~~ reported by some studies (Arimoto et al., 2002; Shen et al., 2006; Lu et al., 2011).

#### 534 **4.2 Spectral– and time–dependent dust extinction and absorption coefficients, complex refrac-** 535 **tive index, and SSA**

536 Figure 5 illustrates a typical spectral– and time–dependent set of measured optical properties. The  
537 spectral extinction coefficient, absorption coefficient, SSA, and real and imaginary parts of the complex  
538 refractive index obtained at 10–min resolution for the Morocco and Algeria samples are shown at the  
539 peak of the dust injection in CESAM and 30 and 90 min after the peak. Figure 5 shows that absorption  
540 decreases with wavelength, but not extinction. The SSA increases from 370 to 590 nm while it ~~is~~ ~~shows~~  
541 almost constant ~~values~~ between 590 and 950 nm. The imaginary ~~part of the~~ refractive index decreases  
542 with  $\lambda$  following the decrease of  $\beta_{\text{abs}}$ . The real part of the refractive index ~~does not depend on~~ ~~is almost~~  
543 ~~constant with~~ wavelength.

544 The extinction and absorption coefficients decrease in absolute value with time, as already shown in  
545 Fig. 3, ~~but t~~ Their spectral dependence remains quite constant with time, ~~even if it~~ ~~but~~ varies from soil to  
546 soil. The experiment–averaged ~~a~~ Absorption, ~~s~~ Scattering, and ~~e~~ Extinction Ångström ~~e~~ Exponents ~~in the~~  
547 ~~370–950 nm spectral range~~, representing the spectral variation of the absorption, scattering and extinc-  
548 tion coefficients, vary between the values of 1.5 and 2.4 (AAE), –0.4 and 0.4 (SAE), and –0.2 and +0.5  
549 (EAE) for the different samples. These values are in line with those previously reported by Moosmüller  
550 et al. (2012) and C17 for dust from various locations. The retrieved  $n$  and  $k$  also show negligible changes  
551 of their spectral shape with time and their magnitude remains approximately constant. In contrast, the  
552 SSA increases with time, in particular below 600 nm wavelength, and ~~so~~ its spectral shape changes.  
553 This is mostly due to the decrease of the coarse size fraction with residence time in the chamber, as  
554 will be analysed in Sect. 4.5. Similarly to the absorption, scattering, and extinction coefficients, the  
555 spectral shape of  $k$  and SSA is somewhat different between the various samples, with the sharpest  
556 spectral variations observed for the most absorbing samples and a less pronounced spectral variation  
557 for the less absorbing ones, as evident, for example, by comparing the SSA data for Morocco and  
558 Algeria in Fig. 5.

#### 559 **4.3 Spectral complex refractive index and SSA for the different source regions and comparison** 560 **to literature data**

561 Figures 6 and 7 shows the experiment–averaged  $n$ ,  $k$ , and SSA between 370 and 950 nm for the nine-  
562 teen aerosol samples analyzed in this study. Data of  $n$ ,  $k$ , and SSA and their uncertainties ~~for each~~  
563 ~~sample~~ are reported in Tables 4 and 5 ~~for each sample~~ together with the average values for each of the  
564 eight different source regions and for the full dataset. Figures 6 and 7 shows that there are significant  
565 differences, both in magnitude and spectral shape, between the imaginary refractive index and SSA for  
566 the different samples. The highest values of  $k$  (0.0048–0.0088 at 370 nm and 0.0012–0.0021 at 950  
567 nm) (and lowest values of SSA) (0.70–0.75 at 370 nm and 0.95–0.97 at 950 nm) are obtained for the  
568 Niger, Mali, Namib–2 and Australia samples, which also show the highest values of both the iron oxide

569 content between 3.6% and 5.8% and hematite content between 2.0% and 4.8% ~~(k is in the range~~  
570 ~~0.0048–0.0088 at 370 nm and 0.0012–0.0021 at 950 nm, and SSA is in the range 0.70–0.75 at 370 nm~~  
571 ~~and 0.95–0.97 at 950 nm)~~. The lowest values ~~(k is 0.001 at 370 and 0.0003 at 950 nm, and SSA is in~~  
572 ~~the range 0.91–0.96 at 370 nm and 0.97–0.99 at 950 nm)~~ are obtained for the Bodélé, Namib–1, and  
573 Arizona samples, which have iron oxide contents between 0.7% and 1.5% ~~(k is 0.001 at 370 and 0.0003~~  
574 ~~at 950 nm, and SSA is in the range 0.91–0.96 at 370 nm and 0.97–0.99 at 950 nm)~~. Both k and SSA  
575 vary from region to region, with the largest absorptions (highest k, lowest SSA) for the Sahel and Aus-  
576 tralia and the lowest absorption (lowest k, highest SSA) in North and South America and the Middle  
577 East; k and SSA values also vary within the same region, as illustrated ~~in Fig. 6~~ for the Sahelian and  
578 Southern African samples. The real part of the refractive index, on the other hand, is not only almost  
579 wavelength-independent, as anticipated, but also relatively invariant from sample to sample. Its aver-  
580 age over the 370–950 nm spectral range is between 1.48 (Gobi) and 1.55 (Ethiopia and Namib–2).

581 The full envelope of n, k, and SSA obtained for the entire set of analysed samples is shown in Fig. ~~87a~~  
582 ~~and 7b (left panels)~~. The real refractive index is relatively invariant, while the spectral k varies by up to  
583 an order of magnitude (0.001–0.009 at 370 nm and 0.0003–0.002 at 950 nm). The SSA changes ac-  
584 cordingly for the different dust samples at the different wavelengths (30% change at 370 nm corre-  
585 sponding to values between 0.70–0.96 and 4% change at 950 nm for values within 0.95–0.99). The  
586 population mean is 1.52 for n (as spectral average) and varies in the range 0.0033–0.0009 for k and  
587 0.85–0.98 for the SSA between 370 and 950 nm (0.0016 and 0.94 as spectral averages for k and SSA)  
588 (Fig. ~~87~~ and Tables 4 and 5).

589 The comparison between the full envelope of n, k, and SSA in this study with literature data is also  
590 shown in Fig. ~~87a and 7b (right panels)~~. Literature values considered for comparison include estimates  
591 from ground-based, aircraft, and satellite observations, laboratory studies, AERONET inversions, and  
592 estimates from mixing rules based on the dust mineralogical composition. Given that the sample selec-  
593 tion in our experiments fully envelopes the global variability of mineralogy of natural dust, we could  
594 expect that our dataset would also fully envelope the global-scale variability of the dust absorption and  
595 scattering properties in the SW. When comparing with available literature data we found that our n and  
596 SSA datasets very well envelope-encompass the range of values indicated in the literature, with only a  
597 few outlier points. In contrast, for the imaginary refractive index the reported range of variability from  
598 the literature is significantly larger than that found in our study, with our range of k being mostly at the  
599 lower bound of previous results. Nonetheless, our range of k values fully envelopes the ensemble of  
600 remote sensing and field campaign data on airborne dust from the previous literature reported in Fig.  
601 ~~78a~~. The global average spectral values for k in our study (thick black line) perfectly match the Dubovik  
602 et al. (2002) dataset from a synthesis of AERONET observations from various locations worldwide.  
603 Likewise, our k average is also very close to the dataset by Balkanski et al. (2007), estimated from  
604 mineralogical composition assuming 1.5% (byin volume) of hematite in dust ~~(a value similar to our pop-~~  
605 ~~ulation average of 1.8% (in mass) for the dust hematite content)~~, a value shown to allow a reconciliation  
606 of climate modelling and satellite observations of the dust direct SW radiative effect. By comparison,  
607 the average dust hematite content for the ensemble of our analysed samples is 1.8% (in mass), close  
608 to the 1.5% value proposed by Balkanski et al. (2007).

609 Looking at Fig. 87a, the datasets ~~which that~~ show the largest values, which also fall outside ~~deviations~~  
610 ~~from~~ our estimated range of  $k$  over the entire considered wavelength range are the ones by: (i) Volz  
611 (1972), Patterson et al. (1977) and Hess et al. (1998; i.e., the OPAC 3.1 version database, which is the  
612 same  $k$  dataset used in the new OPAC 4.0 version, Koepke et al., 2015) showing larger values than  
613 our dataset over the entire considered wavelength range. These datasets, ~~which~~ ~~are also~~ amongst the  
614 most commonly used references for the dust imaginary refractive index in many climate models; and  
615 (ii) the dataset by Wagner et al. (2012), obtained from laboratory chamber experiments, deviating es-  
616 pecially below 600 nm wavelength from our range of  $k$ . ~~from laboratory chamber experiments;~~ ~~and (iii)~~  
617 ~~the dataset by Steigmann and Yang (2017), estimated from a machine learning technique.~~ The reasons  
618 for these discrepancies in the  $k$  values are difficult to assess, since they ~~could an~~ be related to both  
619 instrumental and analytical aspects. In the studies by Volz (1972) and Patterson et al. (1977), for in-  
620 stance, the complex refractive index was obtained by transmittance and diffuse reflectance on pellet  
621 samples, a technique that requires the dust to be pressed in a matrix of non-absorbing material. In this  
622 case a discrepancy arises from the different optical behaviour between dust compressed in a pellet and  
623 the airborne particles. Moreover, Volz (1972) and Patterson et al. (1977) analyse dust aerosols collected  
624 after mid- to long-range transport, ~~thusse~~ after the dust has ~~ve been~~ possibly been mixed with absorb-  
625 ing species.

626 For the case of Wagner et al. (2012) the imaginary refractive index was retrieved from, ~~laboratory~~  
627 chamber experiments on suspended dust, as in our study. Nonetheless, their approach differs in various  
628 aspects from the one applied here and this can lead to the observed differences in the retrieved  $k$ . First,  
629 the aerosol generation technique is different between the two works and this possibly leads to particles  
630 with different physico-chemical features compared to our study. In Wagner et al. (2012) the dust aerosol  
631 was generated by a rotating brush disperser using only the 20–75  $\mu\text{m}$  sieved fraction of the soils. This  
632 system acts to disaggregate the finest particles of the soil by passing it through a nozzle. Then the  
633 largest aerosol grains were removed by a cyclone system (50% cutoff at 1.2  $\mu\text{m}$  aerodynamic diameter),  
634 so that only the submicron size fraction was measured. We show in Sect. 4.5 that  $k$  is independent of  
635 size for the range of investigated effective coarse diameters between 2 and 4  $\mu\text{m}$ , but the range of sizes  
636 analysed in Wagner et al. (2012) is significantly lower than in our study and a size-effect cannot be  
637 excluded. In fact, the relationship between dust absorption and iron content may vary depending on the  
638 considered size fraction (see C17) due to the fact that iron bearing minerals are more concentrated in  
639 the clay fraction (<2.0  $\mu\text{m}$ ) of the dust (Kandler et al., 2009). Moreover, generating dust in a different  
640 way may lead to differences in the chemical and mineralogical size-dependent composition of the sam-  
641 ple, therefore contributing to the observed differences. The impact of this is however difficult to evaluate.  
642 Another difference concerns the choice of the optical theory to retrieve  $k$  (T-matrix in Wagner et al.  
643 instead of Mie theory as used in our work). This can contribute to the observed differences, even if in a  
644 limited way (Mogili et al., 2007; Sorribas et al., 2015). Third, in their retrieval Wagner et al. fixed the real  
645 refractive index to a wavelength-independent value of 1.53 (as done in several other field and labora-  
646 tory studies in Fig. 8) and this assumption can bias high/low the retrieved  $k$  if the actual  $n$  is higher/lower  
647 than the assumed 1.53 value. So, in summary, while multiple factors could contribute to the discrepancy  
648 it remains however difficult to assess which source of discrepancy is dominant.

649

#### 650 4.4 Imaginary refractive index and SSA versus iron and iron oxide content

651 The sample-to-sample variability of the imaginary part of the refractive index  $k$  and the SSA observed  
652 in Fig. 6 and 7 is related to the dust composition by investigating the dependence on the particle iron  
653 content. In Fig. 89 we show the experiment-averaged  $k$  and SSA at 370, 520, and 950 nm versus the  
654 mass concentration of iron oxides (hematite+goethite,  $MC_{Fe-ox\%}$ ), hematite ( $MC_{Hem\%}$ ), goethite  
655 ( $MC_{Goeth\%}$ ), and total elemental iron ( $MC_{Fe\%}$ ) measured for the different dust samples analyzed in this  
656 study. The data are linearly fitted to relate  $k$  and SSA to  $MC_{Fe-ox\%}$ ,  $MC_{Hem\%}$ ,  $MC_{Goeth\%}$ , and  $MC_{Fe\%}$ . The  
657 results of the fits at all wavelengths between 370 and 950 nm are reported in Table 6, together with the  
658 statistical indicators of the goodness of fit (correlation coefficient,  $R^2$ , and reduced chi square,  $\chi^2_{red}$ , i.e.,  
659 the obtained chi square divided by the number of degrees of freedom). The data in Fig. 8 and Table 6  
660 indicate that there is an excellent correlation between both  $k$  and SSA and  $MC_{Fe-ox\%}$  at the different  
661 wavelengths ( $R^2 > 0.75$ ). A weaker correlation is found when relating  $k$  and SSA to  $MC_{Hem\%}$  and  $MC_{Fe\%}$   
662 ( $R^2$  between 0.40 and 0.74 for  $k$  and between 0.49 and 0.78 for the SSA), and  $MC_{Goeth\%}$  ( $R^2$  between  
663 0.17 and 0.62). The better correlation of  $k$  and SSA to  $MC_{Fe-ox\%}$  compared to  $MC_{Fe\%}$  is expected since  
664 dust optical properties in the visible wavelengths are mostly sensitive to the fraction of iron oxides,  
665 rather than to iron incorporated into the crystal structure of silicates (i.e., Karickhoff and Bailey, 1973;  
666 Lafon et al., 2006; Moosmüller et al., 2012; Klaver et al., 2011; Engelbrecht et al., 2016; C17). The  
667 quantities that most robustly satisfy a linear relationship are  $k$  and  $MC_{Fe-ox\%}$ , as indicated by the reduced  
668 chi square  $\chi^2_{red}$  that is around 1 at all different wavelengths. The  $\chi^2_{red}$  increases to values also larger  
669 than 2 in the other cases, indicating the poorer robustness of the fit in these cases.

670 We also investigated the dependence of the spectral  $k$  and SSA on the mass concentration of other  
671 minerals contained in dust, such as clays, calcite, quartz, and feldspars, and also on the mass concen-  
672 tration of different elements. We found that there is no statistically significant correlation between  $k$  and  
673 or SSA and the mass concentration of any of these compounds (not shown), with  $R^2$  values between  
674 0.002 and 0.46 at the different wavelengths for all cases.

675 These results therefore clearly show that iron, particularly in the form of iron oxides (hematite + goe-  
676 thite), is the main driver of dust shortwave absorption. Measuring only the hematite mass fraction to  
677 estimate the dust absorption, as it is sometimes done, is therefore not sufficient.

#### 678 4.5 Imaginary refractive index and SSA versus dust coarse size fraction

679 The dependence of the spectral  $k$  and SSA on the dust coarse fraction is investigated by relating it to  
680 the  $D_{eff,coarse}$  calculated from the size distribution data behind the SW instruments inlets. The  $k_{10-min}$  and  
681  $SSA_{10-min}$  at 370, 520, and 950 nm versus  $D_{eff,coarse}$  are shown in Fig. 109 for all experimental data,  
682 which we separated into three classes based on their iron oxide content ( $MC_{Fe-ox\%} \leq 1.5\%$ ,  $1.5\% <$   
683  $MC_{Fe-ox\%} < 3\%$ ,  $MC_{Fe-ox\%} \geq 3\%$ ). Figure 109 shows that even if the correlation is not very strong  
684 ( $R^2 < 0.54$ ), there is a clearly decreasing tendency for the  $SSA_{10-min}$  with increasing  $D_{eff,coarse}$ , particularly  
685 at 370 and 520 nm for strongly absorbing samples with iron oxide content larger than 3%. The  $SSA_{10-$

686  $m_{\min}$  is mostly independent of changes of  $D_{\text{eff,coarse}}$  at 950 nm. Conversely,  $k_{10-\min}$  has a very poor corre-  
687 lation with  $D_{\text{eff,coarse}}$  ( $R^2 < 0.35$ ) and thus does not depend on size. Similar results were also obtained for  
688 the real part (not shown).

689

690 These results confirm previous observations (Sokolik and Toon, 1999; McConnell et al., 2008, 2010;  
691 ~~Kandler et al., 2011~~; Ryder et al., 2013a; 2013b) that the refractive index, ~~an intrinsic property of matter,~~  
692 is independent of size. This suggests that size-dependent mineralogical composition is not sufficient to  
693 affect  $k$  (in the limit of our measurement and retrieval procedure precision). It is worth mentioning that  
694 only few past studies evidenced a dependence of  $k$  on the size distribution of the dust aerosols (i.e.,  
695 Kandler et al., 2009, 2011; Otto et al., 2009) maybe because the refractive index was retrieved in these  
696 studies from mixing rules based on the estimated size-dependent mineralogical composition.

697 ~~while~~ Differently from  $k$ , the SSA increases as the coarse dust size fraction decreases. This is due to  
698 the fact that absorption efficiency for a single particle ( $Q_{\text{abs}}$ ) increases with particle diameter while the  
699 scattering efficiency ( $Q_{\text{sca}}$ ) decreases. Ryder et al. (2013a) also showed that the dependence of SSA  
700 on size is linear, but important only when the coarse fraction is high (if particles larger than about 3  $\mu\text{m}$   
701 in diameter are present), otherwise the SSA depends mainly on composition, also in agreement with  
702 more recent field observations by Ryder et al. (2018).

### 703 **5. Summary and concluding remarks**

704 In this paper we presented new measurements of the spectral SW complex refractive index ( $m=n-ik$ )  
705 and single scattering albedo (SSA) for nineteen mineral dust aerosols generated in the laboratory from  
706 natural soil samples from major desert dust source areas in northern Africa, the Sahel, Middle East,  
707 eastern Asia, North and South America, southern Africa, and Australia, and selected to represent the  
708 heterogeneity of the dust composition at the global scale, in particular the range of iron oxide concen-  
709 trations. The envelope of refractive indices and SSA data obtained in this study can thus be taken as  
710 representative of the variability of the global dust aerosol.

711 Experiments described here were conducted in the 4.2  $\text{m}^3$  CESAM chamber, a ~~realistic and~~-dynamic  
712 environment where dust aerosols ~~can be~~ generated and maintained in suspension for ~~few~~-several  
713 hours while monitoring the evolution of their physical, chemical, and optical properties. The generated  
714 dust aerosols are characterized by a realistic size distribution, including both the sub-micron and the  
715 super-micron fraction, and they have an atmospherically representative mass concentration and com-  
716 position, including iron oxides and elemental iron content.

717 Some other laboratory studies have been performed in the past to investigate the shortwave SSA of  
718 dust from different sources worldwide and its dependence on composition (Linke et al., 2006; Moosmül-  
719 ler et al., 2012; Engelbrecht et al., 2016). Conversely, for the refractive index there exists to our  
720 knowledge only one other chamber study (Wagner et al., 2012), that retrieved the imaginary part  $k$   
721 between 305 and 955 nm for dust aerosols from a limited number of source areas in Africa (Burkina  
722 Faso, Egypt and Morocco). As a matter of fact, our work provides the first consistent simulation chamber  
723 study of the complex refractive index of global dust.



724  
725  
726  
727  
728  
729  
730  
731  
732  
733  
734  
735  
736  
737  
738  
739  
740  
741  
742  
743  
744  
745  
746  
747  
748  
749  
750  
751  
752  
753  
754  
755  
756  
757  
758  
759  
760  
761

The results of the present study can be summarized as follows:

1. The spectral  $k$  and SSA retrieved in this study vary from sample to sample within the same region but also from a region to another. For  $k$ , values vary between 0.0011–0.00988 at 370 nm, 0.0006 to 0.0048 at 520 nm, and 0.0003–0.002 at 950 nm. For SSA, values vary from 0.70 to 0.96 at 370 nm, 0.85 to 0.98 at 520 nm, and from 0.95 to 0.99 at 950 nm. In contrast,  $n$  is wavelength-independent and almost uniform for the different sources, with values between 1.48 and 1.55. Values for  $n$  and SSA fall within the range of published literature estimates, while for  $k$  we obtain a much narrower range of variability than the ensemble of literature results, as illustrated in Fig. 87. In particular, we found lower values of  $k$  compared to most of the literature values currently used in climate models, such as Volz et al. (1972), Patterson et al. (1977), and the OPAC database (Hess et al., 1998; Koepke et al., 2015). In their study, Miller et al. (2014) state that the values of Dubovik et al. (2002) from AERONET, Patterson et al. (1977) for far-travelled dust, and OPAC probably bracket the global solar absorption by dust. In contrast, our results indicate that dust absorption is lower than previously thought, and its average is close to the values reported by Dubovik et al. (2002) from AERONET observations and Balkanski et al. (2007) for a dust with a 1.5% volume fraction of hematite. Our range of variability of an order of magnitude for  $k$  and between 4% and 30% for the spectral SSA is actually large enough to change the sign of the global dust direct effect at the TOA (Miller et al., 2004), as well as its regional implications (e.g., Solmon et al., 2008; Jin et al., 2016), and has to be taken into account in climate modelling.
2. The documented changes in  $k$  and SSA also impact remote sensing retrievals. To give an example, following Gasteiger et al. (2011), our observed variability of about 10% for the SSA at 532 nm would translate to about 40% variability in the retrieved extinction profiles and optical depths from lidar observations for dust from varying sources.
3. The sample-to-sample variability observed in this study is mostly related to the iron oxide and elemental iron content in dust. At each investigated wavelength the magnitude of  $k$  and SSA is linearly correlated to the mass concentration of total iron oxides, hematite, goethite, and total elemental iron. Small variations of these compounds translate into large variations of  $k$  and SSA. ~~This suggests that it is sufficient to know the content of iron oxide or elemental iron in dust to predict its spectral  $k$  and SSA, which represents a huge simplification for parameterizing their regional and global variability.~~
4. We also investigated the dependence of  $k$  and SSA on the size distribution of dust. While  $k$  is independent of size (suggesting that a constant value can be used along transport), below 600 nm the SSA linearly decreases for increasing  $D_{\text{eff,coarse}}$  for strongly absorbing samples with more than 3% iron oxide content. ~~The~~ investigated range of  $D_{\text{eff,coarse}}$  is within ~~about 2 and~~ 4  $\mu\text{m}$ , and thus comparable to values obtained along a transport path over the Atlantic Ocean for dust during about 2 to 6 days following emission (Denjean et al., 2016a).



762 5. The observations of points 3 and 4 suggest that while it is sufficient to know the content of iron  
763 oxide (or elemental iron) in dust to predict its spectral k, which means that only one tracer is needed  
764 in models to parametrize its regional and global variability, for the spectral SSA both composition  
765 and size distribution are required.

## 767 6. Concluding remarks

768  
769 Based on our results, we recommend that dust simulations, as well as remote sensing retrievals, use  
770 source-dependent values of the spectral SW refractive index and SSA instead of generic values. We  
771 propose, as a first step, a set of regionally-averaged n, k, and SSA values to represent dust from each  
772 of the eight regions analysed here as well as a global average value from the ensemble of our data  
773 (Tables 4 and 5).- Furthermore, the relationships found between k and SSA and the iron oxides or  
774 elemental iron content in dust open the perspective to establish predictive rules to estimate the spec-  
775 trally-resolved SW absorption of dust based on composition. We recommend the use of iron oxide  
776 content rather than iron content as it is better correlated with k and SSA. The relationship found in this  
777 study, nonetheless, refer to the bulk composition of the dust aerosols and to a size range typical of 2 to  
778 6 days of transport in the atmosphere. As demonstrated in C17 ~~with-for~~ the mass extinction efficiency,  
779 the relationships linking the dust absorption to iron content vary as a function of the analysed size  
780 fraction due to the fact that iron bearing minerals are more concentrated in the clay fraction (<2.0  $\mu\text{m}$ )  
781 than in the coarsest fraction of the dust (Kandler et al., 2009; C17). Further investigation should be  
782 therefore addressed to evaluate the dependence of the spectral k and SSA versus iron content as a  
783 function of the size distribution of the particles, in particular extending to a wider range of  $D_{\text{eff,coarse}}$   
784 compared to the one investigated in the present study. This will allow to determine if the k and SSA  
785 versus iron relationships change or not in different phases of the aerosol lifetime, so if it is valid close-  
786 from the to source areas (when the coarsest fraction is dominant, i.e.  $D_{\text{eff,coarse}}$  up to 15  $\mu\text{m}$ , Ryder et al.  
787 (2013b)), and in to-long-range transport conditions (when most of the coarse particle fraction above  
788 few  $\mu\text{m}$  has settled out (i.e.,  $D_{\text{eff,coarse}}$  of 2–3  $\mu\text{m}$  or lower, Denjean et al. (2016b)).

789 -We point out, however, that the use of mineralogy to estimate k and SSA based on linear relationships,  
790 as obtained in our study, requires ~~nonetheless~~ that the model-predicted dust composition accurately  
791 reflects that of the natural atmospheric aerosols. To this aim, realistic soil mineralogy databases and  
792 accurate modelling of the soil to aerosol size fractionation need to be developed in model schemes. In  
793 this sense we mention the EMIT project (Earth Surface Mineral Dust Source Investigation) as a potential  
794 near-future source of high resolution surface mineralogy data for arid and semi-arid regions based on  
795 imaging spectroscopy satellite data (Green et al., 2018). Also, a realistic representation of the size  
796 distribution, in particular the coarse mode fraction of dust and its retention during atmospheric transport,  
797 should be provided in models given its importance in affecting the SSA, as shown in this study and  
798 previously reported in other papers (Ryder et al., 2013a, 2013b, 2018; Kok et al., 2017).

799 Our study focuses on the dust spectral optical properties between 370 and 950 nm. Further work is  
800 required to extend the range of spectral refractive index and SSA data to wavelengths lower than 370

801 nm or higher than 950 nm given that these data are often required in Global Circulation Models and  
802 Numerical Weather Prediction models.

803 We do not provide any quantification of the uncertainty associated with the assumption of spherical  
804 particles in our study, even if we acknowledge the potential role of non-sphericity in affecting our data  
805 treatment and results. Additional work is foreseen to better investigate the shape of our generated dust  
806 and the impact of non-sphericity on retrieved spectral refractive indices and SSA.

807  
808 Finally, this study had the objective to investigate the variability of the dust SW optical properties at the  
809 global scale ~~in-linked~~ to the global variability of the dust composition. It is noteworthy that observations  
810 over Southern Africa and the Sahel from the present study indicate that the k and SSA ~~variabilitiesvar-~~  
811 ~~iability~~ over these regions ~~are-is~~ comparable to the ones obtained for the global scale. For other regions,  
812 such as North America and Australia, only one sample was analyzed, with no information on the re-  
813 gional-scale variability of k and SSA. Additionally, for some of the analyzed areas, such as the Bodélé  
814 depression, even local scale variability (on the order of few km) may be of relevance, given the docu-  
815 mented local scale changes of the particles' mineralogy and iron content (Bristow et al., 2010). More  
816 efforts should be therefore devoted to better characterize the variability of dust spectral optical proper-  
817 ties at the regional and sub-regional scale with the aim of better assessing the dust impact on the  
818 climate of different areas of the world.

## 821 **Data availability**

822 Complex refractive index and single scattering albedo data for the different analyzed samples are pro-  
823 vided in Tables 4 and 5 and will be compiled together with aerosol properties from other studies within  
824 the Library of Advanced Data Products (LADP) of the EUROCHAMP datacenter (<https://data.euro->  
825 champ.org). ~~Processed-The~~ CESAM data used in this study are immediately available upon request to  
826 the contact author and ~~They~~ will also soon be made available through the Database of Atmospheric  
827 Simulation Chamber Studies (DASCS) of the EUROCHAMP datacenter (<https://data.eurochamp.org>  
828 /)EUROCHAMP-2020 data center (<https://data.eurochamp.org/>). The following IDL routines were used  
829 in the analysis: mpfitexy.pro (available at <https://github.com/williamsmj/mpfitexy>) was used to linearly fit  
830 data taking into account uncertainties on both x and y; mie\_single.pro (available at  
831 [http://www.atm.ox.ac.uk/code/mie/mie\\_single.html](http://www.atm.ox.ac.uk/code/mie/mie_single.html)) was used for optical calculations using Mie theory;  
832 mpcurvefit.pro (available at <http://cow.physics.wisc.edu/~craigm/idl/idl.html>) was used for size lognor-  
833 mal fitting.

## 835 **Author contributions**

836 C. Di Biagio, P. Formenti, Y. Balkanski, and J. F. Doussin designed the experiments and discussed the  
837 results. C. Di Biagio performed the experiments and performed the full data analysis with contributions

838 by P. Formenti, L. Caponi, M. Cazaunau, E. Pangui, and J.F. Doussin. The soil samples used for ex-  
839 periments were collected by M. O. Andreae, K. Kandler, T. Saeed, S. Piketh, D. Seibert, and E. Wil-  
840 liams. E. Journet participated to the selection of the soil samples for experiments. S\_ophie Nowak per-  
841 formed the XRD measurements. C. Di Biagio and P. Formenti wrote the manuscript with comments  
842 from all co-authors.

843

## 844 **Acknowledgements**

845 The RED-DUST project was supported by the French national programme LEFE/INSU, and by the  
846 OSU-EFLUVE (Observatoire des Sciences de l'Univers-Enveloppes Fluides de la Ville à l'Exobiologie)  
847 through dedicated research funding. The authors acknowledge ~~and by~~ the CNRS-INSU ~~by~~for support-  
848 ing the CESAM chamber as national facility and the AERIS datacenter (www.aeris-data.fr) for distrib-  
849 uting and curing the data produced by the CESAM chamber through the hosting of the EUROCHAMP  
850 datacenter.-

851 This work has received funding from the European Union's Horizon 2020 research and innovation pro-  
852 gramme through the EUROCHAMP-2020 Infrastructure Activity under grant agreement no. 730997.

853 This work was granted access to the HPC resources of TGCC under allocation 2018-A0050102201  
854 made by GENCI. C. Di Biagio was supported by the CNRS via the Labex L-IPSL, funded by the ANR  
855 (grant no. ANR-10-LABX-0018). K. Kandler is funded by the Deutsche Forschungsgemeinschaft  
856 (DFG, German Research Foundation) – 264907654; 416816480 (KA 2280). Field sampling in Saudi  
857 Arabia was supported by a grant from King Saud University. The authors thank the LISA staff, who  
858 participated in the collection of the soil samples from Tunisia, Niger, Atacama, Patagonia, and the Gobi  
859 desert used in this study, and S. Caquineau (LOCEAN), S. Chevaillier (LISA) and G. Landrot (synchro-  
860 tron SOLEIL), for their contribution in the XRD, WD-XRF and XANES analyses. C. Di Biagio thanks P.  
861 Stegmann for providing corrected refractive index data shown in Fig. 8. The authors wish also to  
862 acknowledge Claire Ryder and Carlos Pérez Garcia Pando for providing valuable comments that helped  
863 to increase the readability and quality of the paper.

864

865

## 866 **References**

867

868 Anderson, T. L. and Ogren, J. A.: Determining aerosol radiative properties using the TSI 3563 integrating nephe-  
869 lomometer, *Aerosol Sci. Technol.*, 29, 57–69, 1998.

870 Arimoto, R., Balsam, W., and Schloesslin, C.: Visible spectroscopy of aerosol particles collected on filters: iron-  
871 oxide minerals, *Atmos. Environ.*, 36, 89–96, 2002.

872 Arnott, W., Hamasha, K., Moosmüller, H., Sheridan, P. J. , and Ogren, J. A.: Towards aerosol light-absorption  
873 measurements with a 7-wavelength aethalometer: Evaluation with a photoacoustic instrument and 3-wave-  
874 length nephelometer, *Aerosol Sci. Tech.*, 39(1), 17–29, 2005.

875 Balkanski, Y., Schulz, M., Claquin, T., and Guibert, S.: Reevaluation of Mineral aerosol radiative forcings suggests  
876 a better agreement with satellite and AERONET data, *Atmos. Chem. Phys.*, 7, 81–95, doi:10.5194/acp-7-81-  
877 -2007, 2007.

878 Bangalath, H.K. and Stenchikov, G.: Sensitivity of the Middle East-North African Tropical Rainbelt to Dust  
879 Shortwave Absorption: A High-Resolution AGCM Experiment. *J. Climate*, 29, 7103–7126,  
880 <https://doi.org/10.1175/JCLI-D-15-0827.1>, 2016.

- 881 Betzer, P., Carder, K., Duce, R., & Merrill, J.: Long range transport of giant mineral aerosol particles. *Nature*, 336,  
882 568–571, 1988.
- 883 Boucher, O., et al., *Clouds and Aerosols*. Stocker, T., & Qin, D. (eds), *Climate Change 2013: The Physical Science*  
884 *Basis. Contribution of Working Group I to the Fifth Assessment Report of the Intergovernmental Panel on Cli-*  
885 *mate Change*. Cambridge Univ. Press, Cambridge, United Kingdom and New York, NY, USA, 2013.
- 886 Bretl, S., P. Reutter, C. C. Raible, S. Ferrachat, C. Schnadt Poberaj, L. E. Revell, and U. Lohmann: The influence  
887 of absorbed solar radiation by Saharan dust on hurricane genesis, *J. Geophys. Res. Atmos.*, 120,  
888 doi:10.1002/2014JD022441, 2015.
- 889 Bristow, C. S., Hudson-Edwards, K. A., and Chappell, A.: Fertilizing the Amazon and equatorial Atlantic with West  
890 African dust, *Geophys. Res. Lett.*, 37, L14807, doi:10.1029/2010GL043486, 2010.
- 891 Caponi, L., Formenti, P., Massabó, D., Di Biagio, C., Cazaunau, M., Pangui, E., Chevaillier, S., Landrot, G., An-  
892 dreae, M. O., Kandler, K., Piketh, S., Saeed, T., Seibert, D., Williams, E., Balkanski, Y., Prati, P., and Doussin,  
893 J.-F.: Spectral- and size-resolved mass absorption efficiency of mineral dust aerosols in the shortwave  
894 spectrum: a simulation chamber study, *Atmos. Chem. Phys.*, 17, 7175–7191, [https://doi.org/10.5194/acp-17-](https://doi.org/10.5194/acp-17-7175-2017)  
895 [7175-2017](https://doi.org/10.5194/acp-17-7175-2017), 2017.
- 896 Carrico, C. M., P. Kus, M. J. Rood, P. K. Quinn, and T. S. Bates, Mixtures of pollution, dust, sea salt, and volcanic  
897 aerosol during ACE-Asia: Radiative properties as a function of relative humidity, *J. Geophys. Res.*, 108, 8650,  
898 doi: 10.1029/2003JD003405, D23, 2003.
- 899 Cattrall, C., Carder, K. L., and Gordon, H. R.: Columnar aerosol single-scattering albedo and phase function  
900 retrieved from sky radiance over the ocean: Measurements of Saharan dust, *J. Geophys. Res.-Atmos.*,  
901 108(D9), 4287, doi:10.1029/2002JD002497, 2003
- 902 Chen, G., Ziemba, L. D., Chu, D. A., Thornhill, K. L., Schuster, G. L., Winstead, E. L., Diskin, G. S., Ferrare, R. A.,  
903 Burton, S. P., Ismail, S., Kooi, S. A., Omar, A. H., Slusher, D. L., Kleb, M. M., Reid, J. S., Twohy, C. H., Zhang,  
904 H., and Anderson, B. E.: Observations of Saharan dust microphysical and optical properties from the Eastern  
905 Atlantic during NAMMA airborne field campaign, *Atmos. Chem. Phys.*, 11, 723–740,  
906 <https://doi.org/10.5194/acp-11-723-2011>, 2011.
- 907 Chou, C., Formenti, P., Maille, M., Ausset, P., Helas, G., Harrison, M., and Osborne, S.: Size distribution, shape,  
908 and composition of mineral dust aerosols collected during the African Monsoon Multidisciplinary Analysis Spe-  
909 cial Observation Period 0: Dust and Biomass-Burning Experiment field campaign in Niger, January 2006, *J.*  
910 *Geophys. Res.*, 113, D00C10, doi:10.1029/2008jd009897, 2008.
- 911 Claquin, T., Schulz, M., and Balkanski, Y.: Modeling the mineralogy of atmospheric dust sources, *J. Geophys.*  
912 *Res.*, 104, 22 243– 22 256, 1999.
- 913 Clarke, A. D., Shinozuka, Y. V., Kapustin, N., Howell, S., Huebert, B., Doherty, S., Anderson, T., Covert, D., Ander-  
914 son, J., Hua, X., Moore II, K. G., McNaughton, C., Carmichael, G., and Weber, R.: Size distributions and mix-  
915 tures of dust and black carbon aerosol in Asian outflow: Physiochemistry and optical properties, *J. Geophys.*  
916 *Res.*, 109, D15S09, doi:10.1029/2003JD004378, 2004.
- 917 Colarco, P. R., Nowottnick, E. P., Randles, C. A., Yi, B., Yang, P., Kim, K.-M., Smith, J. A., and Bardeen, C. G.:  
918 Impact of radiatively interactive dust aerosols in the NASA GEOS-5 climate model: Sensitivity to dust particle  
919 shape and refractive index, *J. Geophys. Res. Atmos.*, 119, 753–786, doi: 10.1002/2013JD020046, 2014.
- 920 Collaud Coen, M., Weingartner, E., Apituley, A., Ceburnis, D., Fierz-Schmidhauser, R., Flentje, H., Henzing, J.  
921 S., Jennings, S. G., Moerman, M., Petzold, A., Schmid, O., and Baltensperger, U.: Minimizing light absorption  
922 measurement artifacts of the Aethalometer: evaluation of five correction algorithms, *Atmos. Meas. Tech.*, 3,  
923 457–474, doi:10.5194/amt-3-457-2010, 2010.
- 924 d'Almeida, G. A., Koepke, P., and Shettle, E.P.: *Atmospheric Aerosols: Global Climatology and Radiative Charac-*  
925 *teristics*, A. Deepak Publishing, 561 pp., 1991.
- 926 Das, S., S. Dey, S. K. Dash, G. Giuliani, and F. Solmon: Dust aerosol feedback on the Indian summer monsoon:  
927 Sensitivity to absorption property, *J. Geophys. Res. Atmos.*, 120, 9642–9652, doi: 10.1002/2015JD023589,  
928 2015.
- 929 Denjean, C., Formenti, P., Picquet-Varrault, B., Katrib, Y., Pangui, E., Zapf, P., and Doussin, J. F.: A new exper-  
930 imental approach to study the hygroscopic and optical properties of aerosols: application to ammonium sulphate  
931 particles, *Atmos. Meas. Tech.*, 7, 183–197, doi:10.5194/amt-7-183-2014, 2014.
- 932 Denjean, C., Cassola, F., Mazzino, A., Triquet, S., Chevaillier, S., Grand, N., Bourriane, T., Momboisse, G., Sel-  
933 legri, K., Schwarzenbock, A., Freney, E., Mallet, M., and Formenti, P.: Size distribution and optical properties  
934 of mineral dust aerosols transported in the western Mediterranean, *Atmos. Chem. Phys.*, 16, 1081–1104,  
935 <https://doi.org/10.5194/acp-16-1081-2016>, 2016a.
- 936 Denjean, C., Formenti, P., Desboeufs, K., Chevaillier, S., Triquet, S., Maillé, M., Cazaunau, M., Laurent, B., Mayol-  
937 -Bracero, O. L., Vallejo, P., Quiñones, M., Gutierrez-Molina, I. E., Cassola, F., Prati, P., Andrews, E., and

938 Ogren, J.: Size distribution and optical properties of African mineral dust after intercontinental transport, *J.*  
939 *Geophys. Res.—Atmos.*, 121, 7117–7138, <https://doi.org/10.1002/2016JD024783>, 2016b.

940 Derimian, Y., Karnieli, A., Kaufman, Y. J., Andreae, M. O., Andreae, T. W., Dubovik, O., Maenhaut, W., and Koren,  
941 I.: The role of iron and black carbon in aerosol light absorption, *Atmos. Chem. Phys.*, 8, 3623–3637, 2008.

942 Di Biagio, C., Formenti P., Styler S. A., Pangui E., and Doussin J.—F.: Laboratory chamber measurements of the  
943 longwave extinction spectra and complex refractive indices of African and Asian mineral dusts, *Geophys. Res.*  
944 *Lett.*, 41, 6289–6297, doi:10.1002/2014GL060213, 2014a.

945 Di Biagio, C., Boucher, H., Caquineau, S., Chevaillier, S., Cuesta, J., and Formenti, P.: Variability of the infrared  
946 complex refractive index of African mineral dust: experimental estimation and implications for radiative transfer  
947 and satellite remote sensing, *Atmos. Chem. Phys.*, 14, 11093–11116, [https://doi.org/10.5194/acp—14—](https://doi.org/10.5194/acp—14—11093—2014)  
948 11093—2014, 2014b.

949 Di Biagio, C., Formenti, P., Balkanski, Y., Caponi, L., Cazaunau, M., Pangui, E., Journet, E., Nowak, S., Caquineau,  
950 S., Andreae, M. O., Kandler, K., Saeed, T., Piketh, S., Seibert, D., Williams, E., and Doussin, J.—F.: Global  
951 scale variability of the mineral dust long—wave refractive index: a new dataset of in situ measurements for  
952 climate modeling and remote sensing, *Atmos. Chem. Phys.*, 17, 1901–1929, [https://doi.org/10.5194/acp—17—](https://doi.org/10.5194/acp—17—1901—2017)  
953 1901—2017, 2017a.

954 Di Biagio, C., Formenti, P., Cazaunau, M., Pangui, E., Marchand, N., and Doussin, J.—F.: Aethalometer multiple  
955 scattering correction  $C_{ref}$  for mineral dust aerosols, *Atmos. Meas. Tech.*, 10, 2923–2939,  
956 <https://doi.org/10.5194/amt—10—2923—2017>, 2017b.

957 Dubovik, O., Holben, B. N., and Eck, T. F. et al.: Variability of absorption and optical properties of key aerosol types  
958 observed in worldwide locations, *J. Atmos. Sci.*, 59, 590–608, 2002. Dunion, J. P., and C. S. Velden: The impact  
959 of the Saharan air layer on Atlantic tropical cyclone activity, *Bull. Am. Meteorol. Soc.*, 85(3), 353. Meteoro:  
960 10.1175/BAMS—85—3—353, 2004.

961 Engelbrecht, J. P., Moosmüller, H., Pincock, S., Jayanty, R. K. M., Lersch, T., and Casuccio, G.: Technical note:  
962 Mineralogical, chemical, morphological, and optical interrelationships of mineral dust re—suspensions, *Atmos.*  
963 *Chem. Phys.*, 16, 10809–10830, <https://doi.org/10.5194/acp—16—10809—2016>, 2016. Feng, Q., P. Yang, G.  
964 W. Kattawar, C. N. Hsu, S.—C. Tsay, and I. Laszlo: Effects of particle nonsphericity and radiation polarization  
965 on retrieving dust properties from MODIS observations, *J. Aerosol Sci.*, 40(9), 776–789, doi:10.1016/j.jaero-  
966 sci.2009.05.001, 2009.

967 Flores, J. M., Trainic, M., Borrmann, S., and Rudich, Y.: Effective broadband refractive index retrieval by a white  
968 light optical particle counter, *Phys. Chem. Chem. Phys.*, 11, 7943–7950, 2009.

969 Formenti, P., Andreae, M. O., Lange, L., Roberts, G., Cafmeyer, J., Rajta, I., Maenhaut, W., Holben, B. N., Artaxo,  
970 P., and Lelieveld, J.: Saharan dust in Brazil and Suriname during the Large—Scale Biosphere—Atmosphere  
971 Experiment in Amazonia (LBA) – Cooperative LBA Regional Experiment (CLAIRE) in March 1998, *J. Geophys.*  
972 *Res.*, 106, 14919–14934, <https://doi.org/10.1029/2000jd900827>, 2001.

973 Formenti, P., Rajot, J. L., Desboeufs, K., Said, F., Grand, N., Chevaillier, S., and Schmechtig, C.: Airborne obser-  
974 vations of mineral dust over western Africa in the summer Monsoon season: spatial and vertical variability of  
975 physico—chemical and optical properties, *Atmos. Chem. Phys.*, 11, 6387–6410, doi:10.5194/acp—11—6387-  
976 2011, 2011.

977 Formenti, P., Caquineau, S., Desboeufs, K., Klaver, A., Chevaillier, S., Journet, E., and Rajot, J. L.: Mapping the  
978 physicochemical properties of mineral dust in western Africa: mineralogical composition, *Atmos. Chem. Phys.*,  
979 14, 10663–10686, <https://doi.org/10.5194/acp—14—10663—2014>, 2014a.

980 Formenti, P., Caquineau, S., Chevaillier, S., Klaver, A., Desboeufs, K., Rajot, J. L., Belin, S., and Briois, V.: Domi-  
981 nance of goethite over hematite in iron oxides of mineral dust from western Africa: quantitative partitioning by  
982 X—ray Absorption Spectroscopy, *J. Geophys. Res.—Atmos.*, 119, 12740–12754,  
983 <https://doi.org/10.1002/2014JD021668>, 2014b.

984 Gasteiger, J., Wiegner, M., Groß, S., Freudenthaler, V., Toledano, C., Tesche, M., and Kandler, K.: Modelling lidar-  
985 relevant optical properties of complex mineral dust aerosols, *Tellus B*, 63, 725–741,  
986 <https://doi.org/10.1111/j.1600—0889.2011.00559.x>, 2011.

987 Ginoux, P., Prospero, J. M., Gill, T. E., Hsu, N. C., and Zhao, M.: Global—scale attribution of anthropogenic and  
988 natural dust sources and their emission rates based on MODIS Deep Blue aerosol products, *Rev. Geophys.*,  
989 50, RG3005, doi:10.1029/2012RG000388, 2012.

990

991 [Green, R. O.; Mahowald, N. M.; Clark, R. N.; Ehlmann, B. L.; Ginoux, P. A.; Kalashnikova, O. V.; Miller, R. L.; Okin,](#)  
992 [G.; Painter, T. H.; Pérez García-Pando, C.; Realmuto, V. J.; Swayze, G. A.; Thompson, D. R.; Middleton, E.;](#)  
993 [Guanter, L.; Ben Dor, E.; Phillips, B. R. \(2018\) NASA's Earth Surface Mineral Dust Source Investigation. Amer-](#)  
994 [ican Geophysical Union, Fall Meeting 2018, abstract #A24D—01.](#)



995 Haywood, J., Francis, P., Osborne, S., Glew, M., Loeb, N., Highwood, E., Tanré, D., Myhre, G., Formenti, P., and  
 996 Hirst, E.: Radiative properties and direct radiative effect of Saharan dust measured by the C-130 aircraft during  
 997 SHADE: 1. Solar spectrum, *J. Geophys. Res.*, 108(D18), 8577, doi:10.1029/2002JD002687, 2003.  
 998 Hess, M., Koepke, P., and Schult, I.: Optical properties of aerosols and clouds: The software package OPAC, *Bull.*  
 999 *Am. Meteorol. Soc.*, 79, 831–844, 1998.  
 1000 Highwood, E. J., and Ryder, C. L.: Radiative effects of dust. In *Mineral Dust: A Key Player in the Earth System*. P.  
 1001 Knippertz, and J.-B.W. Stuut, Eds. Springer, 267–286, doi:10.1007/978-94-017-8978-3\_13, 2014.  
 1002 Hsu, N. C., Tsay, S.-C., King, M. D., and Herman, J. R.: Aerosol properties over bright-reflecting source regions,  
 1003 *IEEE T. Geosci. Remote Sens.*, 42, 557–569, 2004.  
 1004 Iwasaka, Y., Shi, G.-Y., Shen, Z., Kim, Y. S., Trochkin, D., Matsuki, A., Zhang, D., Shibata, T., Nagatani, M., and  
 1005 Nakata, H.: Nature of atmospheric aerosols over the desert area in the Asian continent: chemical state and  
 1006 number concentration of particles measured at Dunhuang, China, *Water Air Soil Poll.*, 3, 129–145, 2003  
 1007 Jeong, G. Y., J. Y. Kim, J. Seo, G. M. Kim, H. C. Jin, and Y. Chun: Long-range transport of giant particles in Asian  
 1008 dust identified by physical, mineralogical, and meteorological analysis, *Atmos. Chem. Phys.*, 14(1), 505–521,  
 1009 doi:10.5194/acp-14-505-2014, 2014.  
 1010 Jin, Q., Zang, Z.-L., and Wei, J.: High sensitivity of Indian summer monsoon to Middle East dust absorptive prop-  
 1011 erties, *Sci. Rep.*, 6:30690, doi: 10.1038/srep30690, 2016.  
 1012 Johnson, B. T. and Osborne, S. R.: Physical and optical properties of mineral dust aerosol measured by aircraft  
 1013 during the GERBILS campaign. *Q.J.R. Meteorol. Soc.*, 137: 1117–1130. doi:10.1002/qj.777, 2011.  
 1014 Journet, E., Balkanski, Y., and Harrison, S. P.: A new data set of soil mineralogy for dust-cycle modeling, *Atmos.*  
 1015 *Chem. Phys.*, 14, 3801–3816, doi:10.5194/acp-14-3801-2014, 2014.  
 1016 Kalashnikova, O. V. and Sokolik, I. N.: Modeling the radiative properties of nonspherical soil-derived mineral aer-  
 1017 osols, *J. Quant. Spectrosc. Ra.*, 87, 137–166, 2004.  
 1018 Kandler, K., Schütz, L., Deutscher, C., Ebert, M., Hofmann, H., Jäckel, S., Jaenicke, R., Knippertz, P., Lieke, K.,  
 1019 Massling, A., Petzold, A., Schladitz, A., Weinzierl, B., Wiedensohler, A., Zorn, S., and Weinbruch, S.: Size dis-  
 1020 tribution, mass concentration, chemical and mineralogical composition and derived optical parameters of the  
 1021 boundary layer aerosol at Tinfou, Morocco, during SAMUM 2006, *Tellus B*, 61, 32–50, doi:10.1111/j.1600-  
 1022 0889.2008.00385.x, 2009.  
 1023 Karickhoff, S.W. and Bailey, G.W. 1973. Optical absorption spectra of clay minerals. *Clay Clay Miner.*, 21, 59–  
 1024 70. Kaufman, Y. J.: Satellite sensing of aerosol absorption, *J. Geophys. Res.*, 92, 4307–4317, 1987.  
 1025 Kaufman, Y. J., Tanré, D., Dubovik, O., Karnieli, A., and Remer, L. A.: Absorption of sunlight by dust as inferred  
 1026 from satellite and ground-based remote sensing, *Geophys. Res. Lett.*, 28, 1479–1482, 2001.  
 1027 Koepke, P., Gasteiger, J., and Hess, M.: Technical Note: Optical properties of desert aerosol with non-spherical  
 1028 mineral particles: data incorporated to OPAC, *Atmos. Chem. Phys.*, 15, 5947–5956,  
 1029 <https://doi.org/10.5194/acp-15-5947-2015>, 2015.  
 1030 Kok, J.F., D.A. Ridley, Q. Zhou, R.L. Miller, C. Zhao, C.L. Heald, D.S. Ward, S. Albani, and K. Haustein: Smaller  
 1031 desert dust cooling effect estimated from analysis of dust size and abundance. *Nature Geosci.*, 10, no. 4, 274-  
 1032 -278, doi:10.1038/ngeo2912, 2017.  
 1033 Konaré, A., Zakey, A. S., Solmon, F., Giorgi, F., Rauscher, S., Ibrah, S., and Bi, X.: A regional climate modeling  
 1034 study of the effect of desert dust on the West African monsoon, *J. Geophys. Res.*, 113, D12206,  
 1035 doi:10.1029/2007JD009322, 2008.  
 1036 Koven, C.D., and Fung, I.: Inferring dust composition from wavelength-dependent absorption in Aerosol Robotic  
 1037 Network (AERONET) data. *J Geophys Res* 111, D14205. doi:10.1029/2005JD006678, 2006.  
 1038 Lafon, S., Sokolik, I. N., Rajot, J. L., Caquineau, S., and Gaudichet, A.: Characterization of iron oxides in mineral  
 1039 dust aerosols: Implications for light absorption, *J. Geophys. Res.*, 111, D21207, doi:10.1029/2005jd007016, 2006.  
 1040 Liao, H. and Seinfeld, J. H.: Radiative forcing by mineral dust aerosols: sensitivity to key variables, *J. Geophys.*  
 1041 *Res.*, 103(D24), 31 637–31 646, doi:10.1029/1998JD200036, 1998.  
 1042 Lide, D. R.: *CRC Handbook of Chemistry and Physics 1991–1992*, CRC Press, Boca Raton, Florida, 1992.  
 1043 Linke, C., Möhler, O., Veres, A., Mohácsi, A., Bozóki, Z., Szabó, G., and Schnaiter, M., Optical properties and  
 1044 mineralogical composition of different Saharan mineral dust samples: a laboratory study, *Atmos. Chem. Phys.*,  
 1045 6, 3315–3323, 2006.  
 1046 Lu, H., Wei, W., Liu, M., Wu, X., Mou, S., and Han, Q.: Quantification and semi-quantification of iron-oxide  
 1047 minerals in aerosol particles in the hinterland of Taklimakan Desert, *Scientia Geographica Sinica*, 31, 969–975,  
 1048 2011.  
 1049 Maring, H., Savoie, D. L., Izaguirre, M. A., McCormick, C., Arimoto, R., Prospero, J. M., and Pilinis, C.: Aerosol  
 1050 physical and optical properties and their relationship to aerosol composition in the free troposphere at izana,  
 1051 tenerife, canary islands, during July 1995, *J. Geophys. Res.—Atmos.*, 105, 14677–14700, 2000.



1052 Maring, H., Savoie, D. L., Izaguirre, M. A., Custals, L., and Reid, J. S.: Mineral dust aerosol size distribution change  
1053 during atmospheric transport, *J. Geophys. Res.*, 108, 8592, doi:10.1029/2002jd002536, 2003.

1054 McConnell, C. L., Highwood, E. J., Coe, H., Formenti, P., Anderson, B., Osborne, S., Nava, S., Desboeufs, K.,  
1055 Chen, G., and Harrison, M. A. J.: Seasonal variations of the physical and optical characteristics of Saharan  
1056 dust: Results from the Dust Outflow and Deposition to the Ocean (DODO) experiment, *J. Geophys. Res.*, 113,  
1057 D14S05, doi:10.1029/2007jd009606, 2008.

1058 McConnell, C. L., Formenti, P., Highwood, E. J., and Harrison, M. A. J.: Using aircraft measurements to determine  
1059 the refractive index of Saharan dust during the DODO Experiments, *Atmos. Chem. Phys.*, 10, 3081–3098,  
1060 doi:10.5194/acp-10-3081-2010, 2010.

1061 Miller, R. L., I. Tegen, and J. Perlwitz: Surface radiative forcing by soil dust aerosols and the hydrologic cycle, *J.*  
1062 *Geophys. Res.*, 109, D04203, doi:10.1029/2003JD004085, 2004.

1063 Miller, R. L., Knippertz, P., Pérez García-Pando, C., Perlwitz, J. P., and Tegen, I.: Impact of dust radiative forcing  
1064 upon climate. In *Mineral Dust: A Key Player in the Earth System*. P. Knippertz, and J.-B.W. Stuut, Eds.  
1065 Springer, 327–357, doi:10.1007/978-94-017-8978-3\_13, 2014.

1066 Mishchenko, M., A. Lacis, B. Carlson, and L. Travis: Nonsphericity of dust-like tropospheric aerosols—Implica-  
1067 tions for aerosol remotesensing and climate modeling, *Geophys. Res. Lett.*, 22(9), 1077–1080, 1995.

1068 Mogili, P. K., Yang, K. H., Young, M. A., Kleiber, P. D., and Grassian, V. H.: Environmental aerosol chamber studies  
1069 of extinction spectra of mineral dust aerosol components: Broadband IR–UV extinction spectra, *J. Geophys.*  
1070 *Res.–Atmos.*, 112, D21204, doi:10.1029/2007JD008890, 2007.

1071 Moosmüller, H., Engelbrecht, J. P., Skiba, M., Frey, G., Chakrabarty, R.K., and Arnott, W.P., Single scattering  
1072 albedo of fine mineral dust aerosols controlled by iron concentration, *J. Geophys. Res.*, 117, D11210,  
1073 doi:10.1029/2011JD016909, 2012.

1074 Müller, T., Schladitz, A., Massling, A., Kaaden, N., Kandler, K., and coauthors: Spectral absorption coefficients and  
1075 imaginary parts of refractive indices of Saharan dust during SAMUM-1. *Tellus* 61B, 79–95, 2009.

1076 Müller, T., Schladitz, A., Kandler, K., and Wiedensohler, A.: Spectral particle absorption coefficients, single scat-  
1077 tering albedos and imaginary parts of refractive indices from ground based in situ measurements at Cape Verde  
1078 Island during SAMUM-2, *Tellus* B, 63, 573–588, doi:10.1111/j.1600-0889.2011.00572.x, 2011.

1079 Myhre, G. and Stordal, F.: Global sensitivity experiments of the radiative forcing due to mineral aerosols, *J. Ge-*  
1080 *ophys. Res.*, 106(D16), 18 193–18 204, doi:10.1029/2000JD900536, 2001.

1081 Nickovic, S., Vukovic, A., Vujadinovic, M., Djurdjevic, V., and Pejanovic, G.: Technical Note: High-resolution min-  
1082 eralogical database of dust-productive soils for atmospheric dust modeling, *Atmos. Chem. Phys.*, 12, 845–  
1083 855, doi:10.5194/acp-12-845-2012, 2012.

1084 Nousiainen, T. and Kandler, K.: Light scattering by atmospheric mineral dust particles, in: *Light Scattering Reviews*  
1085 9, edited by: Kokhanovsky, A. A., Springer Praxis Books, Springer, Berlin, Heidelberg, 3–52, doi:10.1007/978-  
1086 3-642-37985-7, 2015. ~~16863, 16864, 16866~~

1087 Okada, K., Heintzenberg, J., Kai, K., Qin, Y., 2001. Shape of atmospheric mineral particles collected in three Chi-  
1088 nese arid-regions. *Geophys. Res. Lett.* 28 (16), 3123–3126

1089 Osborne, S.R., Johnson, B.T., Haywood, J.M., Baran, A.J., Harrison, M.A.J., and McConnell, C.L.: Physical and  
1090 optical properties of mineral dust aerosol during the Dust and Biomass-burning Experiment, *J. Geophys. Res.*,  
1091 113, D00C03, doi:10.1029/2007jd009551, 2008.

1092 Otto, S., Bierwirth, E., Weinzierl, B., Kandler, K., Esselborn, M., Tesche, M., Schladitz, A., Wendisch, M., and Tra-  
1093 utmann, T.: Solar radiative effects of a Saharan dust plume observed during SAMUM assuming spheroidal  
1094 model particles, *Tellus* B, 61, 270–296, doi:10.1111/j.1600-0889.2008.00389.x, 2009.

1095 Patterson, E.M., Filette, D. A., and Stockton, B. H.: Complex index of refraction between 300 and 700 nm for  
1096 Saharan aerosols, *J. Geophys. Res.*, 82, 3153–3160, 1977.

1097 Perlwitz, J. P., Pérez García-Pando, C., and Miller, R. L.: Predicting the mineral composition of dust aerosols –  
1098 Part 1: Representing key processes, *Atmos. Chem. Phys.*, 15, 11593–11627, https://doi.org/10.5194/acp-15-  
1099 11593-2015, 2015a.

1100 Perlwitz, J. P., Pérez García-Pando, C., and Miller, R. L.: Predicting the mineral composition of dust aerosols –  
1101 Part 2: Model evaluation and identification of key processes with observations, *Atmos. Chem. Phys.*, 15, 11629-  
1102 11652, https://doi.org/10.5194/acp-15-11629-2015, 2015b.

1103 Petzold, A., Schloesser, H., Sheridan, P. J., Arnott, W. P., Ogren, J. A., and Virkkula, A.: Evaluation of Multi-angle  
1104 Absorption Photometry for Measuring Aerosol Light Absorption, *Aerosol Sci. Technol.*, 39, 40–51, 2005.

1105 Petzold, A., Rasp, K., Weinzierl, B., Esselborn, M., Hamburger, T., Dornbrack, A., Kandler, K., Schutz, L., Knip-  
1106 pertz, P., Fiebig, M., Virkkula, A., Saharan dust absorption and refractive index from aircraft-based observa-  
1107 tions during SAMUM 2006, *Tellus* B 61: 118–130, 2009.

1108 Petzold, A., Onasch, T., Kebejian, P., and Freedman, A.: Intercomparison of a Cavity Attenuated Phase Shift–  
1109 based extinction monitor (CAPS PMex) with an integrating nephelometer and a filter–based absorption moni-  
1110 tor, *Atmos. Meas. Tech.*, 6, 1141–1151, doi:10.5194/amt–6–1141–2013, 2013. Räsänen, P., P. Haapanala,  
1111 C. E. Chung, M. Kahnert, R. Makkonen, J. Tonttila, and T. Nousiainen: Impact of dust particle non–  
1112 sphericity on climate simulations, *Q. J. R. Meteorol. Soc.*, 139, 2222–2232, doi:10.1002/qj.2084, 2012.  
1113  
1114 [Räsänen, P., P. Haapanala, C. E. Chung, M. Kahnert, R. Makkonen, J. Tonttila, and T. Nousiainen: Impact of dust  
1115 particle non–sphericity on climate simulations, \*Q. J. R. Meteorol. Soc.\*, 139, 2222–2232, doi:10.1002/qj.2084,  
1116 2012.](#)  
1117 Rajot, J. L., Formenti, P., Alfaro, S., Desboeufs, K., Chevaillier, S., Chatenet, B., Gaudichet, A., Journet, E., Marti-  
1118 corena, B., Triquet, S., Maman, A., Mouget, N., and Zakou, A.: AMMA dust experiment: an overview of meas-  
1119 urements performed during the dry season special observation period (SOP0) at the Banizoumbou (Niger)  
1120 supersite, *J. Geophys. Res.*, 113, D00C14, doi:10.1029/2008jd009906, 2008.  
1121 Redmond, H. E., Dial, K. D., and Thompson, J.E.: Light scattering and absorption by wind–blown dust: theory,  
1122 measurement and recent data, *Aeolian Res.*, 2, 5–26, 2010.  
1123 Reid, E. A., Reid, J. S., Meier, M. M., Dunlap, M. R., Cliff, S. S., Broumas, A., Perry, K., and Maring, H.: Charac-  
1124 terization of African dust transported to Puerto Rico by individual particle and size segregated bulk analysis, *J.*  
1125 *Geophys. Res.*, 108, 8591, doi:10.1029/2002jd002935, 2003.  
1126 Ridley, D. A., Heald, C. L., Kok, J. F., and Zhao, C.: An observationally constrained estimate of global dust aerosol  
1127 optical depth, *Atmos. Chem. Phys.*, 16, 15097–15117, https://doi.org/10.5194/acp–16–15097–2016, 2016.  
1128 Rocha–Lima, A., Martins, J. V., Remer, L. A., Todd, M., Marsham, J. H., Engelstaedter, S., Ryder, C. L., Cavazos–  
1129 Guerra, C., Artaxo, P., Colarco, P., and Washington, R.: A detailed characterization of the Saharan dust col-  
1130 lected during the Fennec campaign in 2011: in situ ground–based and laboratory measurements, *Atmos.*  
1131 *Chem. Phys.*, 18, 1023–1043, https://doi.org/10.5194/acp–18–1023–2018, 2018.  
1132 Ryder, C. L., Highwood, E. J., Rosenberg, P. D., Trembath, J., Brooke, J. K., Bart, M., Dean, A., Crosier, J., Dorsey,  
1133 J., Brindley, H., Banks, J., Marsham, J. H., McQuaid, J. B., Sodemann, H., and Washington, R.: Optical prop-  
1134 erties of Saharan dust aerosol and contribution from the coarse mode as measured during the Fennec 2011  
1135 aircraft campaign, *Atmos. Chem. Phys.*, 13, 303–325, doi:10.5194/acp–13–303–2013, 2013a.  
1136 Ryder, C. L., Highwood, E. J., Lai, T. M., Sodemann, H., and Marsham J. H.: Impact of atmospheric transport on  
1137 the evolution of microphysical and optical properties of Saharan dust, *Geophys. Res. Lett.*, 40, 2433–2438, doi:  
1138 10.1002/grl.50482, 2013b.  
1139 [Ryder, C. L., Marenco, F., Brooke, J. K., Estelles, V., Cotton, R., Formenti, P., McQuaid, J. B., Price, H. C., Liu, D.,  
1140 Ausset, P., Rosenberg, P. D., Taylor, J. W., Choularton, T., Bower, K., Coe, H., Gallagher, M., Crosier, J., Lloyd,  
1141 G., Highwood, E. J., and Murray, B. J.: Coarse–mode mineral dust size distributions, composition and optical  
1142 properties from AER–D aircraft measurements over the tropical eastern Atlantic, \*Atmos. Chem. Phys.\*, 18,  
1143 17225–17257, https://doi.org/10.5194/acp–18–17225–2018, 2018.](#)  
1144 Samset, B. H., Stjern, C. W., Andrews, E., Kahn, R. A., Myhre, G., Schulz, M., and Schuster, G. L.: Aerosol Ab-  
1145 sorption: Progress Towards Global and Regional Constraints, *Curr. Clim. Change Rep.*, 4, 65–83, 2018.  
1146 Saturno, J., Pöhlker, C., Massabo, D., Brito, J., Carbone, S., Cheng, Y. F., Chi, X. G., Ditas, F., de Angelis, I. H.,  
1147 Moran–Zuloaga, D., Pöhlker, M. L., Rizzo, L. V., Walter, D., Wang, Q. Q., Artaxo, P., Prati, P., and Andreae,  
1148 M. O.: Comparison of different Aethalometer correction schemes and a reference multi–wavelength absorption  
1149 technique for ambient aerosol data: *Atmos. Meas. Tech.*, 10, 2837–2850, doi:10.5194/amt–10–2837–2017,  
1150 2017.  
1151 Scanza, R. A., Mahowald, N., Ghan, S., Zender, C. S., Kok, J. F., Liu, X., Zhang, Y., and Albani, S.: Modeling dust  
1152 as component minerals in the Community Atmosphere Model: development of framework and impact on radi-  
1153 ative forcing, *Atmos. Chem. Phys.*, 15, 537–561, doi:10.5194/acp–15–537–2015, 2015.  
1154 Scheuvsens, D., Schütz, L., Kandler, K., Ebert, M., and Weinbruch, S.: Bulk composition of northern African dust  
1155 and its source sediments – A compilation, *Earth–Sci. Rev.*, 116, 170–194, https://doi.org/10.1016/j.earsci-  
1156 rev.2012.08.005, 2013.  
1157 Schladitz, A., Müller, T., Kaaden, N., Massling, A., Kandler, K., Ebert, M., Weinbruch, S., Deutscher, C., and  
1158 Wiedensohler, A.: In situ measurements of optical properties at Tinfou (Morocco) during the Saharan Mineral  
1159 Dust Experiment SAMUM 2006, *Tellus B*, 61, 64–78, doi:10.1111/j.1600–0889.2008.00397.x, 2009.  
1160 Shen, Z., Cao, J., Zhang, X., Arimoto, R., Ji, J., Balsam, W., Wang, Y., Zhang, R., and Li, X.: Spectroscopic analysis  
1161 of iron–oxide minerals in aerosol particles from northern China, *Sci. Total Environ.*, 367, 899–907, 2006.  
1162 Shettle, E. P., and Fenn, R.W.: Models for the Aerosols of the Lower Atmosphere and the Effects of Humidity  
1163 Variations on Their Optical Properties, AFGL–TR–79–0214, ADA085951, 1979.

1164 Shin, S.-K., Tesche, M., Kim, K., Kezoudi, M., Tatarov, B., Müller, D., and Noh, Y.: On the spectral depolarisation  
1165 and lidar ratio of mineral dust provided in the AERONET version 3 inversion product, *Atmos. Chem. Phys.*, 18,  
1166 12735–12746, <https://doi.org/10.5194/acp-18-12735-2018>, 2018.

1167 Sinyuk, A., Torres, O., and Dubovik, O., Combined use of satellite and surface observations to infer the imaginary  
1168 part of refractive index of Saharan dust, *Geophys. Res. Lett.*, 30(2), 1081, doi:10.1029/2002GL016189, 2003.

1169 Sokolik, I., and Toon, O.: Incorporation of mineralogical composition into models of the radiative properties of min-  
1170 eral aerosol from UV to IR wavelengths, *J. Geophys. Res.*, 104(D8), 9423–9444, 1999.

1171 Sokolik, I.N., Andronova, A.V., and Jonhson, T.C.: Complex refractive index of atmospheric dust aerosols, *Atmos.*  
1172 *Environ.*, 16, 2495–2502, 1993.

1173 Solmon, F., Mallet, M., Elguindi, N., Giorgi, F., Zakey, A. and Konaré, A.: Dust aerosol impact on regional precipi-  
1174 tation over western Africa, mechanisms and sensitivity to absorption properties, *Geophys. Res. Lett.*, 35,  
1175 L24705, doi:10.1029/2008GL035900, 2008.

1176 [Sorribas, M., Olmo, F. J., Quirantes, A., Lyamani, H., Gil-Ojeda, M., Alados-Arboledas, L. and Horvath, H. \(2015\).  
1177 \[Role of spheroidal particles in closure studies for aerosol microphysical–optical properties. Q.J.R. Meteorol.  
1178 \\[Soc.\\]\\(#\\), 141: 2700–2707. doi:10.1002/qj.2557.\]\(#\)](#)

1179 Stegmann, P. G., Yang, P., A regional, size-dependent, and causal effective medium model for Asian and Sa-  
1180 haran mineral dust refractive index spectra, *J. Aer. Sci.*, 114, 327–341, 2017.

1181 Strong, J. D. O., Vecchi, G. A., & Ginoux, P.: The climatological effect of Saharan dust on global tropical cyclones  
1182 in a fully coupled GCM. *Journal of Geophysical Research: Atmospheres*, 123, 5538–5559. [https://doi-  
1184 org.insu.bib.cnrs.fr/10.1029/2017JD027808](https://doi-<br/>
1183 org.insu.bib.cnrs.fr/10.1029/2017JD027808), 2018

1184 Su, L., and Toon O.B.: Saharan and Asian dust: similarities and differences determined by CALIPSO, AERONET,  
1185 and a coupled climate–aerosol microphysical model, *Atmos. Chem. Phys.*; 11, 3263–3280, 2011.

1186 Todd, M. C., R. Washington, J. V. Martins, O. Dubovik, G. Lizcano, S. M'Bainayel, and S. Engelstaedter, Mineral  
1187 dust emission from the Bodélé´ Depression, northern Chad, during BoDEx 2005, *J. Geophys. Res.*, 112,  
1188 D06207, doi:10.1029/2006JD007170, 2007.

1189 Toon, O. B., Pollack, J. B., and Khare, B. N.: The optical constants of several atmospheric aerosol species: am-  
1190 monium sulphate, aluminum oxide, and sodium chloride, *J. Geophys. Res.*, 81, 5733–5748, 1976.

1191 Uno, I., K. Eguchi, K. Yumimoto, T. Takemura, A. Shimizu, M. Uematsu, Z. Liu, Z. Wang, Y. Hara, and N. Sugimoto,  
1192 Asian dust transported one full circuit around the globe, *Nat. Geosci.*, 2, 557–560, doi:10.1038/ngeo583, 2009.

1193 Vinoj, V. et al. Short-term modulation of Indian summer monsoon rainfall by West Asian dust. *Nature Geoscience*  
1194 7, 308–313, 2014.

1195 Volz, F. E.: Longwave refractive index of atmospheric aerosol substances, *Appl. Optics*, 11, 755–759, 1972.

1196 Wang, J., Doussin, J. F., Perrier, S., Perraudin, E., Katrib, Y., Pangui, E., and Picquet-Varrault, B.: Design of a  
1197 new multi-phase experimental simulation chamber for atmospheric photo-smog, aerosol and cloud chemistry  
1198 research, *Atmos. Meas. Tech.*, 4, 2465–2494, 2011.

1199 Wagner, R., Ajtai, T., Kandler, K., Lieke, K., Linke, C., Müller, T., Schnaiter, M., and Vragel, M.: Complex refractive  
1200 indices of Saharan dust samples at visible and near UV wavelengths: a laboratory study, *Atmos. Chem. Phys.*,  
1201 12, 2491–2512, doi:10.5194/acp-12-2491-2012, 2012.

1202 Weingartner, E., Saathoff, H., Schnaiter, M., Streit, N., Bitnar, B., and Baltensperger, U.: Absorption of light by soot  
1203 particles: determination of the absorption coefficient by means of aethalometers, *J. Aerosol Sci.*, 34, 1445–  
1204 1463, 2003.

1205

1206 Weinzierl, B., Petzold, A., Esselborn, M., Wirth, M., Rasp, K., Kandler, K., Schutz, L., Koepke, P., and Fiebig, M.:  
1207 Airborne measurements of dust layer properties, particle size distribution and mixing state of Saharan dust  
1208 during SAMUM 2006, *Tellus*, 61B, 96–117, doi:10.1111/j.1600-0889.2008.00392.x, 2009.

1209

1210 Weinzierl, B., Sauer, D., Esselborn, M., Petzold, A., Veira, A., Rose, M., Mund, S., Wirth, M., Ansmann, A., Tesche,  
1211 M., Gross, S., and Freudenthaler, V.: Microphysical and optical properties of dust and tropical biomass burning  
1212 aerosol layers in the Cape Verde region—an overview of the airborne in situ and lidar measurements during  
1213 SAMUM-2, *Tellus B*, 63, 589–618, doi:10.1111/j.1600-0889.2011.00566.x, 2011.

1214

1215 [Weinzierl, B. et al. \(2009\). Airborne measurements of dust layer properties, particle size distribution and mixing  
1216 \[state of Saharan dust during SAMUM 2006. Tellus- 61B, 96–117.\]\(#\)](#)

1217 Yi, B., C. N. Hsu, P. Yang, and S.-C. Tsay: Radiative transfer simulation of dust-like aerosols uncertainties from  
1218 particle shape and refractive index, *J. Aerosol Sci.*, 42(10), 631–644, doi:10.1016/j.jaerosci.2011.06.008, 2011.

1219

1220 Yoshida, M. and Murakami, H.: Dust absorption averaged over the Sahara inferred from moderate resolution im-  
1221 aging spectroradiometer data, *Appl. Opt.*, 47, 1995–2003, 2008.

1222  
1223  
1224  
1225  
1226  
1227  
1228  
1229  
1230  
1231  
1232  
1233  
1234  
1235  
1236  
1237  
1238  
1239  
1240  
1241  
1242  
1243  
1244  
1245  
1246  
1247  
1248  
1249  
1250  
1251  
1252  
1253  
1254  
1255  
1256  
1257  
1258  
1259

Yoshioka, M., Mahowald, N.M., Conley, A.J., Collins, W.D., Fillmore, D.W., Zender, C.S., and Coleman, D.B.: Impact of desert dust radiative forcing on sahel precipitation: Relative importance of dust compared to sea surface temperature variations, vegetation changes, and greenhouse gas warming, *J. Clim.*, 20, 1445– 1467, 2007.

1260 **Table 1.** Measured and retrieved quantities and their estimated relative uncertainties. For further de-  
 1261 tails, refer to Sect. 2, as well DB17 and C17.

1262

| Parameter                                                                                                                                 | Time resolution     | Relative uUncertainty                | Uncertainty calculation                                                                                                                                                                                                                                                                                                            | Comments                                                                                                                                                                    |
|-------------------------------------------------------------------------------------------------------------------------------------------|---------------------|--------------------------------------|------------------------------------------------------------------------------------------------------------------------------------------------------------------------------------------------------------------------------------------------------------------------------------------------------------------------------------|-----------------------------------------------------------------------------------------------------------------------------------------------------------------------------|
| Scattering coefficient at 450, 550, and 700 nm, $\beta_{\text{sca}}(\lambda)$                                                             | 10-min data         | 5–12%                                | Quadratic combination of photon counting and gas calibration uncertainty (5%), angular corrections uncertainty (<5%) and standard deviation over 10-min intervals (2–10%).                                                                                                                                                         | The uncertainty on $\beta_{\text{sca}}(\lambda)$ usually decreases with increasing dust residence time in the chamber as a result of the reduction of the coarse component. |
| Absorption coefficient at 370, 470, 520, 590, 660, 880, and 950 nm, $\beta_{\text{abs}}(\lambda)$                                         | 10-min data         | 22–30% at 370 nm<br>23–87% at 950 nm | Error propagation formula <sup>1</sup> on Eq. (2) considering the uncertainties on $\beta_{\text{ATT}}(\lambda)$ from 10-min fitting procedure (error propagation formula <sup>1</sup> on Eq. 1, ~20%), and uncertainties on $\alpha(\lambda)$ (1%), $\beta_{\text{sca}}(\lambda)$ (5–12%), $C_{\text{ref}}$ (10%), and R (1–10%). |                                                                                                                                                                             |
| Extinction coefficient, $\beta_{\text{ext}}(\lambda) = \beta_{\text{sca}}(\lambda) + \beta_{\text{abs}}(\lambda)$                         | 10-min data         | ~25%                                 | Sum of $\beta_{\text{sca}}(\lambda)$ and $\beta_{\text{abs}}(\lambda)$ uncertainties                                                                                                                                                                                                                                               |                                                                                                                                                                             |
| Single Scattering Albedo, SSA ( $\lambda$ ) = $\beta_{\text{sca}}(\lambda) / (\beta_{\text{sca}}(\lambda) + \beta_{\text{abs}}(\lambda))$ | 10-min data         | 9–12%                                | Error propagation formula <sup>1</sup> considering single uncertainties on $\beta_{\text{sca}}$ and $\beta_{\text{abs}}$ .                                                                                                                                                                                                         |                                                                                                                                                                             |
| Single Scattering Albedo, SSA ( $\lambda$ ) = $(1+1/m(\lambda))^{-1}$                                                                     | Experiment averaged | 1–12% at 370 nm<br>1–3% at 950 nm    | Error propagation formula <sup>1</sup> on Eq. (6) considering the uncertainty on $m(\lambda)$ , i.e., the slope of the linear fit between $\beta_{\text{sca}}$ and $\beta_{\text{abs}}$ over the whole duration of each experiment.                                                                                                |                                                                                                                                                                             |
| Complex refractive index ( $n-ik$ )                                                                                                       | 10-min data         | <5% for n <50% for k                 | Deviations of the values of n and k retrieved in the sensitivity study (see Sect. 3.2) with respect to those obtained in the first inversions were assumed to correspond to the one standard deviation uncertainty to 10-min retrieved values.                                                                                     |                                                                                                                                                                             |
| Complex refractive index ( $n-ik$ )                                                                                                       | Experiment averaged | <8% for n 13–75 % for k              | Quadratic combination of the standard deviation of n and k over the experiment and the deviation on the experiment-averaged values between those obtained from central inversions and inversions using input data $\pm$ their uncertainty.                                                                                         |                                                                                                                                                                             |
| Size distribution<br>SMPS geometrical diameter ( $D_g$ ),<br>$D_g = D_m / \chi$                                                           | –                   | ~6%                                  | Error propagation formula <sup>1</sup> considering the uncertainty on the estimated shape factor $\chi$ (~6%)                                                                                                                                                                                                                      | The electrical mobility to geometrical diameter conversion was performed by assuming for dust a dynamic shape factor of $1.75 \pm 0.10$ , as                                |



|                           |                                                        |                     |         |                                                                                                                                                                                                                      |                                                                                                                                                                                                                                                                                                                                                                                                                                                                                                                                                                                                                                                                                                                                                                                                                                                                      |
|---------------------------|--------------------------------------------------------|---------------------|---------|----------------------------------------------------------------------------------------------------------------------------------------------------------------------------------------------------------------------|----------------------------------------------------------------------------------------------------------------------------------------------------------------------------------------------------------------------------------------------------------------------------------------------------------------------------------------------------------------------------------------------------------------------------------------------------------------------------------------------------------------------------------------------------------------------------------------------------------------------------------------------------------------------------------------------------------------------------------------------------------------------------------------------------------------------------------------------------------------------|
|                           |                                                        |                     |         |                                                                                                                                                                                                                      | determined by SMPS–SkyGrimm comparison in their overlapping range (see DB17)                                                                                                                                                                                                                                                                                                                                                                                                                                                                                                                                                                                                                                                                                                                                                                                         |
|                           | SkyGrimm geometrical diameter (D <sub>g</sub> )        | –                   | <15.2%  | Standard deviation of the D <sub>g</sub> values obtained for different refractive indices values used in the optical to geometrical conversion                                                                       | The conversion of optical to geometrical diameters for the SkyGrimm and the WELAS was performed by <a href="#">taking into account the visible complex refractive index of dust aerosols. Optical calculations were computed at the SkyGrimm operating wavelength (0.655 μm) and over the spectral range of the WELAS (0.35 to 0.7 μm) using Mie theory for spherical particles by fixing n at 1.47, 1.50, and 1.53, and by varying k in steps of 0.001 between 0.001 and 0.005. Mie calculations by varying the dust refractive index in the range 1.47–1.53 for the real part and 0.001–0.005 for the imaginary part. Then D<sub>g</sub> is set at the mean ± 1 standard deviation of the values obtained for the different values of n and k (see DB17) (see DB17). Refractive index is assumed to be constant with particle size and wavelength-independent.</a> |
|                           | WELAS geometrical diameter (D <sub>g</sub> )           | –                   | <7%     | The same as for the SkyGrimm                                                                                                                                                                                         |                                                                                                                                                                                                                                                                                                                                                                                                                                                                                                                                                                                                                                                                                                                                                                                                                                                                      |
|                           | (dN/dlogD) <sub>SWoptics</sub>                         | 10–min data         | ~20–90% | Error propagation formula <sup>1</sup> considering the dN/dlogD <sub>g</sub> st. dev. over 10–min and the uncertainty on particle loss function along sampling tubes L(D <sub>g</sub> ) (~50% at 2 μm, ~10% at 8 μm) | The uncertainty of L(D <sub>g</sub> ) was estimated with a sensitivity study by varying the values of the input parameters to the Particle Loss Calculator software within their uncertainties (see DB17)                                                                                                                                                                                                                                                                                                                                                                                                                                                                                                                                                                                                                                                            |
|                           | D <sub>eff, fine</sub>                                 | 10–min data         | <5%     | Deviation obtained by repeating the calculations by using the size distribution ± its uncertainty.                                                                                                                   |                                                                                                                                                                                                                                                                                                                                                                                                                                                                                                                                                                                                                                                                                                                                                                                                                                                                      |
|                           | D <sub>eff, coarse</sub>                               | 10–min data         | 5–40%   |                                                                                                                                                                                                                      |                                                                                                                                                                                                                                                                                                                                                                                                                                                                                                                                                                                                                                                                                                                                                                                                                                                                      |
| Mineralogical composition | Elemental iron mass concentration (MC <sub>Fe%</sub> ) | Experiment averaged | 10%     | Uncertainties calculated as discussed in DB17 and C17                                                                                                                                                                |                                                                                                                                                                                                                                                                                                                                                                                                                                                                                                                                                                                                                                                                                                                                                                                                                                                                      |
|                           | Iron oxides mass concentration (MC <sub>Fe-ox%</sub> ) | Experiment averaged | 15%     |                                                                                                                                                                                                                      |                                                                                                                                                                                                                                                                                                                                                                                                                                                                                                                                                                                                                                                                                                                                                                                                                                                                      |
|                           | Goethite mass concentration (MC <sub>Goet%</sub> )     | Experiment averaged | <10%    |                                                                                                                                                                                                                      |                                                                                                                                                                                                                                                                                                                                                                                                                                                                                                                                                                                                                                                                                                                                                                                                                                                                      |
|                           | Hematite mass concentration (MC <sub>Hem%</sub> )      | Experiment averaged | <10%    |                                                                                                                                                                                                                      |                                                                                                                                                                                                                                                                                                                                                                                                                                                                                                                                                                                                                                                                                                                                                                                                                                                                      |

1263 
$$^1 \sigma_f = \sqrt{\sum_{i=1}^n \left( \frac{\partial f}{\partial x_i} \sigma_{x_i} \right)^2}$$

1264

1265

1266  
1267  
1268  
1269  
1270  
1271  
1272  
1273  
1274  
1275  
1276  
1277  
1278  
1279  
1280  
1281

**Table 2.** Summary of information on the soil samples and sediments used in this study.

| Geographical area                  | Sample       | Coordinates        | Desert area              |
|------------------------------------|--------------|--------------------|--------------------------|
| Northern Africa – Sahara           | Tunisia      | 33.02°N, 10.67°E   | Maouna                   |
|                                    | Morocco      | 31.97°N, 3.28°W    | east of Ksar Sahli       |
|                                    | Libya        | 27.01°N, 14.50°E   | Sebha                    |
|                                    | Algeria      | 23.95°N, 5.47°E    | Ti-n-Tekraouit           |
|                                    | Mauritania   | 20.16°N, 12.33°W   | east of Aouinet Nchir    |
| Sahel                              | Niger        | 13.52°N, 2.63°E    | Banizoumbou              |
|                                    | Mali         | 17.62°N, 4.29°W    | Dar el Beida             |
|                                    | Bodélé       | 17.23°N, 19.03°E   | Bodélé depression        |
| Eastern Africa and the Middle East | Ethiopia     | 7.50°N, 38.65°E    | Lake Shala National Park |
|                                    | Saudi Arabia | 27.49°N, 41.98°E   | Nefud                    |
|                                    | Kuwait       | 29.42°N, 47.69°E   | Kuwaiti                  |
| Eastern Asia                       | Gobi         | 39.43°N, 105.67°E  | Gobi                     |
|                                    | Taklimakan   | 41.83°N, 85.88°E   | Taklimakan               |
| North America                      | Arizona      | 33.15 °N, 112.08°W | Sonoran                  |
| South America                      | Atacama      | 23.72°S, 70.40°W   | Atacama                  |
|                                    | Patagonia    | 50.26°S, 71.50°W   | Patagonia                |
| Southern Africa                    | Namib--1     | 21.24°S, 14.99°E   | Namib                    |
|                                    | Namib--2     | 19.00°S, 13.00°E   | Namib                    |
| Australia                          | Australia    | 31.33°S, 140.33°E  | Strzelecki               |

1282  
1283  
1284  
1285  
1286  
1287  
1288  
1289  
1290  
1291

**Table 3.** Chemical characterization of the dust aerosols in the PM<sub>10.6</sub> size fraction. Column 3 shows MC<sub>Fe%</sub>, the fractional mass of elemental iron with respect to the total dust mass concentration ( $\pm 10\%$  relative uncertainty), and column 4 reports MC<sub>Fe-ox%</sub>, the mass fraction of iron oxides with respect to the total dust mass concentration ( $\pm 15\%$  relative uncertainty) and its speciation in hematite MC<sub>Hem%</sub> and goethite MC<sub>Goeth%</sub> ( $< \pm 10\%$  relative uncertainty). The iron oxide measurements were not made on the Taklimakan sample. Mean values and standard deviations based on single sample data are reported for the full dataset.

| Geographical area        | Sample     | MC <sub>Fe%</sub> | MC <sub>Fe-ox%</sub> | MC <sub>Hem%</sub> | MC <sub>Goeth%</sub> |
|--------------------------|------------|-------------------|----------------------|--------------------|----------------------|
| Northern Africa – Sahara | Tunisia    | 4.1               | 2.2                  | 1.2                | 1.1                  |
|                          | Morocco    | 3.6               | 1.4                  | 0.4                | 1.0                  |
|                          | Libya      | 5.2               | 3.1                  | 0.9                | 2.2                  |
|                          | Algeria    | 6.6               | 2.7                  | 1.4                | 1.4                  |
|                          | Mauritania | 8.1               | 3.3                  | 3.3                | 0.0                  |

|                                     |                    |                  |                  |                  |                  |
|-------------------------------------|--------------------|------------------|------------------|------------------|------------------|
| Sahel                               | Niger              | 6.1              | 5.8              | 2.3              | 3.5              |
|                                     | Mali               | 6.6              | 3.7              | 2.0              | 1.7              |
|                                     | Bodélé             | 4.1              | 0.7              | 0.7              | 0.0              |
| Eastern Africa and the Middle East  | Ethiopia           | 6.8              | 2.0              | 2.0              | 0.0              |
|                                     | Saudi Arabia       | 3.8              | 2.6              | 1.8              | 0.8              |
|                                     | Kuwait             | 5.0              | 1.5              | 1.5              | 0.0              |
| Eastern Asia                        | Gobi               | 4.8              | 0.9              | 0.9              | 0.0              |
|                                     | Taklimakan         | 5.8              | –                | –                | –                |
| North America                       | Arizona            | 5.3              | 1.5              | 1.5              | 0.0              |
| South America                       | Atacama            | 4.7              | 1.6              | 1.6              | 0.0              |
|                                     | Patagonia          | 5.1              | 1.5              | 0.9              | 0.6              |
| Southern Africa                     | Namib <sub>1</sub> | 2.4              | 1.1              | 0.8              | 0.3              |
|                                     | Namib <sub>2</sub> | 10.6             | 4.8              | 4.8              | 0.0              |
| Australia                           | Australia          | 7.2              | 3.6              | 3.6              | 0.0              |
| <b>Full dataset mean (st. dev.)</b> |                    | <b>5.6 (1.9)</b> | <b>2.4 (1.4)</b> | <b>1.8 (1.1)</b> | <b>0.7 (1.0)</b> |

1292

1293 **Table 4.** Real (n) and imaginary (k) parts of the refractive index estimated for the nineteen analysed  
1294 dust samples and mean values calculated for the eight regions and for the full dataset. Data for single  
1295 soils are reported as experiment-averaged values and their uncertainty is calculated as indicated in  
1296 Table 1. Mean values and standard deviations at each wavelength based on single sample data are  
1297 reported for the eight regions and the full dataset. The median and 10% and 90% percentile values are  
1298 also reported for the full dataset. For North America and Australia, for which only one dust sample was  
1299 analysed, the reported data correspond to the single sample available from these regions. For the real  
1300 part, the average over the whole shortwave range ( $n_{sw}$ ) is indicated.

1301

| Sample/Region                                                 | $n_{sw}$    | $\sigma_{nsw}$ | k                  |                    |                    |                    |                    |                    |                    | $\sigma_k$         |                    |                    |                    |                    |                    |                    |
|---------------------------------------------------------------|-------------|----------------|--------------------|--------------------|--------------------|--------------------|--------------------|--------------------|--------------------|--------------------|--------------------|--------------------|--------------------|--------------------|--------------------|--------------------|
|                                                               |             |                | 0.37<br>$\mu m$    | 0.47<br>$\mu m$    | 0.52<br>$\mu m$    | 0.59<br>$\mu m$    | 0.66<br>$\mu m$    | 0.88<br>$\mu m$    | 0.95<br>$\mu m$    | 0.37<br>$\mu m$    | 0.47<br>$\mu m$    | 0.52<br>$\mu m$    | 0.59<br>$\mu m$    | 0.66<br>$\mu m$    | 0.88<br>$\mu m$    | 0.95<br>$\mu m$    |
| Tunisia                                                       | 1.51        | 0.06           | 0.00<br>45         | 0.00<br>35         | 0.00<br>26         | 0.00<br>18         | 0.00<br>15         | 0.00<br>13         | 0.00<br>12         | 0.00<br>30         | 0.00<br>26         | 0.00<br>18         | 0.00<br>12         | 0.00<br>10         | 0.00<br>08         | 0.00<br>07         |
| Morocco                                                       | 1.49        | 0.03           | 0.00<br>23         | 0.00<br>16         | 0.00<br>12         | 0.00<br>08         | 0.00<br>07         | 0.00<br>06         | 0.00<br>07         | 0.00<br>06         | 0.00<br>04         | 0.00<br>03         | 0.00<br>02         | 0.00<br>02         | 0.00<br>02         | 0.00<br>02         |
| Lybia                                                         | 1.5         | 0.04           | 0.00<br>29         | 0.00<br>19         | 0.00<br>14         | 0.00<br>07         | 0.00<br>06         | 0.00<br>07         | 0.00<br>07         | 0.00<br>06         | 0.00<br>04         | 0.00<br>02         | 0.00<br>01         | 0.00<br>02         | 0.00<br>02         | 0.00<br>02         |
| Algeria                                                       | 1.52        | 0.04           | 0.00<br>25         | 0.00<br>16         | 0.00<br>12         | 0.00<br>07         | 0.00<br>05         | 0.00<br>06         | 0.00<br>06         | 0.00<br>10         | 0.00<br>06         | 0.00<br>04         | 0.00<br>03         | 0.00<br>03         | 0.00<br>03         | 0.00<br>03         |
| Mauritania                                                    | 1.5         | 0.03           | 0.00<br>43         | 0.00<br>33         | 0.00<br>26         | 0.00<br>14         | 0.00<br>13         | 0.00<br>10         | 0.00<br>10         | 0.00<br>10         | 0.00<br>09         | 0.00<br>08         | 0.00<br>03         | 0.00<br>03         | 0.00<br>04         | 0.00<br>03         |
| <b>Northern Africa – Sahara (mean and st. dev.)</b>           | <b>1.51</b> | <b>0.03</b>    | <b>0.00<br/>33</b> | <b>0.00<br/>24</b> | <b>0.00<br/>18</b> | <b>0.00<br/>11</b> | <b>0.00<br/>09</b> | <b>0.00<br/>08</b> | <b>0.00<br/>08</b> | <b>0.00<br/>10</b> | <b>0.00<br/>10</b> | <b>0.00<br/>07</b> | <b>0.00<br/>05</b> | <b>0.00<br/>04</b> | <b>0.00<br/>03</b> | <b>0.00<br/>03</b> |
| Niger                                                         | 1.51        | 0.04           | 0.00<br>88         | 0.00<br>61         | 0.00<br>48         | 0.00<br>34         | 0.00<br>31         | 0.00<br>28         | 0.00<br>21         | 0.00<br>43         | 0.00<br>31         | 0.00<br>23         | 0.00<br>18         | 0.00<br>15         | 0.00<br>10         | 0.00<br>13         |
| Mali                                                          | 1.52        | 0.05           | 0.00<br>48         | 0.00<br>38         | 0.00<br>30         | 0.00<br>23         | 0.00<br>24         | 0.00<br>21         | 0.00<br>21         | 0.00<br>08         | 0.00<br>06         | 0.00<br>04         | 0.00<br>03         | 0.00<br>03         | 0.00<br>03         | 0.00<br>03         |
| Bodélé                                                        | 1.49        | 0.03           | 0.00<br>11         | 0.00<br>07         | 0.00<br>06         | 0.00<br>04         | 0.00<br>04         | 0.00<br>03         | 0.00<br>03         | 0.00<br>06         | 0.00<br>04         | 0.00<br>03         | 0.00<br>02         | 0.00<br>02         | 0.00<br>01         | 0.00<br>01         |
| <b>Sahel (mean and st. dev.)</b>                              | <b>1.51</b> | <b>0.03</b>    | <b>0.00<br/>49</b> | <b>0.00<br/>35</b> | <b>0.00<br/>28</b> | <b>0.00<br/>20</b> | <b>0.00<br/>20</b> | <b>0.00<br/>17</b> | <b>0.00<br/>15</b> | <b>0.00<br/>38</b> | <b>0.00<br/>27</b> | <b>0.00<br/>21</b> | <b>0.00<br/>15</b> | <b>0.00<br/>14</b> | <b>0.00<br/>13</b> | <b>0.00<br/>11</b> |
| Ethiopia                                                      | 1.55        | 0.06           | 0.00<br>26         | 0.00<br>20         | 0.00<br>16         | 0.00<br>13         | 0.00<br>11         | 0.00<br>07         | 0.00<br>06         | 0.00<br>09         | 0.00<br>08         | 0.00<br>07         | 0.00<br>05         | 0.00<br>04         | 0.00<br>02         | 0.00<br>02         |
| Saudi Arabia                                                  | 1.54        | 0.06           | 0.00<br>28         | 0.00<br>21         | 0.00<br>15         | 0.00<br>07         | 0.00<br>06         | 0.00<br>06         | 0.00<br>06         | 0.00<br>06         | 0.00<br>05         | 0.00<br>04         | 0.00<br>02         | 0.00<br>01         | 0.00<br>01         | 0.00<br>01         |
| Kuwait                                                        | 1.50        | 0.04           | 0.00<br>16         | 0.00<br>10         | 0.00<br>08         | 0.00<br>06         | 0.00<br>05         | 0.00<br>05         | 0.00<br>04         | 0.00<br>05         | 0.00<br>03         | 0.00<br>03         | 0.00<br>02         | 0.00<br>02         | 0.00<br>03         | 0.00<br>02         |
| <b>Eastern Africa and the Middle East (mean and st. dev.)</b> | <b>1.53</b> | <b>0.05</b>    | <b>0.00<br/>23</b> | <b>0.00<br/>17</b> | <b>0.00<br/>13</b> | <b>0.00<br/>09</b> | <b>0.00<br/>07</b> | <b>0.00<br/>06</b> | <b>0.00<br/>05</b> | <b>0.00<br/>07</b> | <b>0.00<br/>06</b> | <b>0.00<br/>05</b> | <b>0.00<br/>04</b> | <b>0.00<br/>03</b> | <b>0.00<br/>01</b> | <b>0.00<br/>01</b> |
| Gobi                                                          | 1.48        | 0.05           | 0.00<br>41         | 0.00<br>25         | 0.00<br>18         | 0.00<br>12         | 0.00<br>11         | 0.00<br>12         | 0.00<br>12         | 0.00<br>17         | 0.00<br>09         | 0.00<br>06         | 0.00<br>04         | 0.00<br>04         | 0.00<br>05         | 0.00<br>05         |
| Taklimakan                                                    | 1.54        | 0.07           | 0.00<br>18         | 0.00<br>12         | 0.00<br>09         | 0.00<br>06         | 0.00<br>05         | 0.00<br>05         | 0.00<br>05         | 0.00<br>08         | 0.00<br>05         | 0.00<br>04         | 0.00<br>02         | 0.00<br>02         | 0.00<br>02         | 0.00<br>02         |
| <b>Eastern Asia (mean and st. dev.)</b>                       | <b>1.51</b> | <b>0.05</b>    | <b>0.00<br/>30</b> | <b>0.00<br/>19</b> | <b>0.00<br/>14</b> | <b>0.00<br/>09</b> | <b>0.00<br/>08</b> | <b>0.00<br/>08</b> | <b>0.00<br/>09</b> | <b>0.00<br/>16</b> | <b>0.00<br/>09</b> | <b>0.00<br/>06</b> | <b>0.00<br/>05</b> | <b>0.00<br/>05</b> | <b>0.00<br/>05</b> | <b>0.00<br/>05</b> |
| Arizona                                                       | 1.51        | 0.05           | 0.00<br>11         | 0.00<br>09         | 0.00<br>07         | 0.00<br>05         | 0.00<br>05         | 0.00<br>05         | 0.00<br>04         | 0.00<br>05         | 0.00<br>04         | 0.00<br>03         | 0.00<br>02         | 0.00<br>02         | 0.00<br>02         | 0.00<br>02         |
| <b>North America (mean and st. dev.)</b>                      | <b>1.51</b> | <b>0.05</b>    | <b>0.00<br/>11</b> | <b>0.00<br/>09</b> | <b>0.00<br/>07</b> | <b>0.00<br/>05</b> | <b>0.00<br/>05</b> | <b>0.00<br/>05</b> | <b>0.00<br/>04</b> | <b>0.00<br/>05</b> | <b>0.00<br/>04</b> | <b>0.00<br/>03</b> | <b>0.00<br/>02</b> | <b>0.00<br/>02</b> | <b>0.00<br/>02</b> | <b>0.00<br/>02</b> |
| Atacama                                                       | 1.54        | 0.07           | 0.00<br>16         | 0.00<br>15         | 0.00<br>12         | 0.00<br>08         | 0.00<br>06         | 0.00<br>06         | 0.00<br>06         | 0.00<br>05         | 0.00<br>04         | 0.00<br>03         | 0.00<br>02         | 0.00<br>02         | 0.00<br>02         | 0.00<br>02         |
| Patagonia                                                     | 1.53        | 0.07           | 0.00<br>24         | 0.00<br>16         | 0.00<br>11         | 0.00<br>09         | 0.00<br>06         | 0.00<br>07         | 0.00<br>06         | 0.00<br>08         | 0.00<br>05         | 0.00<br>03         | 0.00<br>03         | 0.00<br>03         | 0.00<br>03         | 0.00<br>02         |
| <b>South America (mean and st. dev.)</b>                      | <b>1.54</b> | <b>0.06</b>    | <b>0.00<br/>20</b> | <b>0.00<br/>15</b> | <b>0.00<br/>11</b> | <b>0.00<br/>08</b> | <b>0.00<br/>06</b> | <b>0.00<br/>07</b> | <b>0.00<br/>06</b> | <b>0.00<br/>06</b> | <b>0.00<br/>01</b> | <b>0.00<br/>01</b> | <b>0.00<br/>01</b> | <b>0.00<br/>00</b> | <b>0.00<br/>01</b> | <b>0.00<br/>00</b> |
| Namib-1                                                       | 1.53        | 0.06           | 0.00<br>12         | 0.00<br>09         | 0.00<br>06         | 0.00<br>04         | 0.00<br>03         | 0.00<br>04         | 0.00<br>04         | 0.00<br>06         | 0.00<br>04         | 0.00<br>03         | 0.00<br>02         | 0.00<br>01         | 0.00<br>02         | 0.00<br>01         |
| Namib-2                                                       | 1.55        | 0.07           | 0.00<br>72         | 0.00<br>54         | 0.00<br>44         | 0.00<br>25         | 0.00<br>18         | 0.00<br>14         | 0.00<br>14         | 0.00<br>27         | 0.00<br>19         | 0.00<br>16         | 0.00<br>09         | 0.00<br>07         | 0.00<br>06         | 0.00<br>06         |
| <b>Southern Africa (mean and st. dev.)</b>                    | <b>1.54</b> | <b>0.06</b>    | <b>0.00<br/>42</b> | <b>0.00<br/>31</b> | <b>0.00<br/>25</b> | <b>0.00<br/>14</b> | <b>0.00<br/>11</b> | <b>0.00<br/>09</b> | <b>0.00<br/>09</b> | <b>0.00<br/>42</b> | <b>0.00<br/>32</b> | <b>0.00<br/>27</b> | <b>0.00<br/>15</b> | <b>0.00<br/>10</b> | <b>0.00<br/>07</b> | <b>0.00<br/>07</b> |
| Australia                                                     | 1.54        | 0.06           | 0.00<br>58         | 0.00<br>42         | 0.00<br>33         | 0.00<br>17         | 0.00<br>13         | 0.00<br>13         | 0.00<br>12         | 0.00<br>22         | 0.00<br>11         | 0.00<br>10         | 0.00<br>06         | 0.00<br>06         | 0.00<br>04         | 0.00<br>03         |
| <b>Australia (mean and st. dev.)</b>                          | <b>1.54</b> | <b>0.06</b>    | <b>0.00<br/>58</b> | <b>0.00<br/>42</b> | <b>0.00<br/>33</b> | <b>0.00<br/>17</b> | <b>0.00<br/>13</b> | <b>0.00<br/>13</b> | <b>0.00<br/>12</b> | <b>0.00<br/>22</b> | <b>0.00<br/>11</b> | <b>0.00<br/>10</b> | <b>0.00<br/>06</b> | <b>0.00<br/>06</b> | <b>0.00<br/>04</b> | <b>0.00<br/>03</b> |
| <b>Full dataset (mean and st. dev.)</b>                       | <b>1.52</b> | <b>0.04</b>    | <b>0.00<br/>33</b> | <b>0.00<br/>24</b> | <b>0.00<br/>18</b> | <b>0.00<br/>12</b> | <b>0.00<br/>10</b> | <b>0.00<br/>09</b> | <b>0.00<br/>09</b> | <b>0.00<br/>21</b> | <b>0.00<br/>16</b> | <b>0.00<br/>13</b> | <b>0.00<br/>08</b> | <b>0.00<br/>07</b> | <b>0.00<br/>06</b> | <b>0.00<br/>05</b> |
| <b>Full dataset median</b>                                    | <b>1.52</b> |                | <b>0.00<br/>26</b> | <b>0.00<br/>19</b> | <b>0.00<br/>14</b> | <b>0.00<br/>08</b> | <b>0.00<br/>06</b> | <b>0.00<br/>07</b> | <b>0.00<br/>06</b> |                    |                    |                    |                    |                    |                    |                    |
| <b>Full dataset 10% percentile</b>                            | <b>1.49</b> |                | <b>0.00<br/>12</b> | <b>0.00<br/>09</b> | <b>0.00<br/>07</b> | <b>0.00<br/>05</b> | <b>0.00<br/>04</b> | <b>0.00<br/>04</b> | <b>0.00<br/>04</b> |                    |                    |                    |                    |                    |                    |                    |

|                             |      |  |            |            |            |            |            |            |            |  |  |  |  |  |  |  |  |
|-----------------------------|------|--|------------|------------|------------|------------|------------|------------|------------|--|--|--|--|--|--|--|--|
| Full dataset 90% percentile | 1.54 |  | 0.00<br>61 | 0.00<br>44 | 0.00<br>35 | 0.00<br>23 | 0.00<br>19 | 0.00<br>15 | 0.00<br>15 |  |  |  |  |  |  |  |  |
|-----------------------------|------|--|------------|------------|------------|------------|------------|------------|------------|--|--|--|--|--|--|--|--|

1302

1303

**Table 5.** As in Table 4 for the single scattering albedo (SSA) data.

| Sample/Region                                                 | SSA                |                    |                    |                    |                    |                    |                    | $\sigma_{SSA}$     |                    |                    |                    |                    |                    |                    |
|---------------------------------------------------------------|--------------------|--------------------|--------------------|--------------------|--------------------|--------------------|--------------------|--------------------|--------------------|--------------------|--------------------|--------------------|--------------------|--------------------|
|                                                               | 0.37 $\mu\text{m}$ | 0.47 $\mu\text{m}$ | 0.52 $\mu\text{m}$ | 0.59 $\mu\text{m}$ | 0.66 $\mu\text{m}$ | 0.88 $\mu\text{m}$ | 0.95 $\mu\text{m}$ | 0.37 $\mu\text{m}$ | 0.47 $\mu\text{m}$ | 0.52 $\mu\text{m}$ | 0.59 $\mu\text{m}$ | 0.66 $\mu\text{m}$ | 0.88 $\mu\text{m}$ | 0.95 $\mu\text{m}$ |
| Tunisia                                                       | 0.85               | 0.90               | 0.93               | 0.95               | 0.95               | 0.97               | 0.97               | 0.03               | 0.02               | 0.02               | 0.01               | 0.01               | 0.01               | 0.01               |
| Morocco                                                       | 0.92               | 0.95               | 0.96               | 0.98               | 0.98               | 0.98               | 0.99               | 0.01               | 0.01               | 0.01               | 0.00               | 0.00               | 0.00               | 0.00               |
| Lybia                                                         | 0.89               | 0.93               | 0.95               | 0.98               | 0.98               | 0.98               | 0.98               | 0.02               | 0.01               | 0.01               | 0.00               | 0.00               | 0.00               | 0.00               |
| Algeria                                                       | 0.87               | 0.92               | 0.94               | 0.97               | 0.97               | 0.98               | 0.98               | 0.02               | 0.01               | 0.01               | 0.00               | 0.00               | 0.00               | 0.00               |
| Mauritania                                                    | 0.85               | 0.90               | 0.94               | 0.96               | 0.97               | 0.98               | 0.98               | 0.02               | 0.01               | 0.01               | 0.01               | 0.01               | 0.00               | 0.00               |
| <b>Northern Africa – Sahara (mean and st. dev.)</b>           | <b>0.88</b>        | <b>0.92</b>        | <b>0.94</b>        | <b>0.97</b>        | <b>0.97</b>        | <b>0.98</b>        | <b>0.98</b>        | <b>0.03</b>        | <b>0.02</b>        | <b>0.02</b>        | <b>0.01</b>        | <b>0.01</b>        | <b>0.01</b>        | <b>0.01</b>        |
| Niger                                                         | 0.72               | 0.85               | 0.89               | 0.91               | 0.92               | 0.94               | 0.95               | 0.09               | 0.09               | 0.07               | 0.05               | 0.05               | 0.03               | 0.02               |
| Mali                                                          | 0.75               | 0.85               | 0.89               | 0.93               | 0.95               | 0.96               | 0.96               | 0.04               | 0.03               | 0.02               | 0.02               | 0.02               | 0.01               | 0.01               |
| Bodélé                                                        | 0.96               | 0.98               | 0.98               | 0.99               | 0.99               | 0.99               | 0.99               | 0.04               | 0.02               | 0.02               | 0.01               | 0.01               | 0.01               | 0.01               |
| <b>Sahel (mean and st. dev.)</b>                              | <b>0.81</b>        | <b>0.89</b>        | <b>0.92</b>        | <b>0.94</b>        | <b>0.95</b>        | <b>0.96</b>        | <b>0.97</b>        | <b>0.13</b>        | <b>0.07</b>        | <b>0.05</b>        | <b>0.04</b>        | <b>0.04</b>        | <b>0.03</b>        | <b>0.02</b>        |
| Ethiopia                                                      | 0.80               | 0.86               | 0.90               | 0.92               | 0.94               | 0.97               | 0.97               | 0.03               | 0.03               | 0.02               | 0.02               | 0.01               | 0.01               | 0.01               |
| Saudi Arabia                                                  | 0.88               | 0.93               | 0.96               | 0.98               | 0.98               | 0.98               | 0.98               | 0.03               | 0.02               | 0.01               | 0.01               | 0.01               | 0.00               | 0.00               |
| Kuwait                                                        | 0.95               | 0.97               | 0.98               | 0.98               | 0.99               | 0.99               | 0.99               | 0.02               | 0.01               | 0.01               | 0.01               | 0.01               | 0.01               | 0.00               |
| <b>Eastern Africa and the Middle East (mean and st. dev.)</b> | <b>0.88</b>        | <b>0.92</b>        | <b>0.94</b>        | <b>0.96</b>        | <b>0.97</b>        | <b>0.98</b>        | <b>0.98</b>        | <b>0.07</b>        | <b>0.05</b>        | <b>0.04</b>        | <b>0.03</b>        | <b>0.03</b>        | <b>0.01</b>        | <b>0.01</b>        |
| Gobi                                                          | 0.88               | 0.92               | 0.94               | 0.96               | 0.97               | 0.97               | 0.97               | 0.04               | 0.03               | 0.02               | 0.01               | 0.01               | 0.01               | 0.01               |
| Taklimakan                                                    | 0.82               | 0.88               | 0.92               | 0.95               | 0.96               | 0.96               | 0.96               | 0.03               | 0.02               | 0.02               | 0.01               | 0.01               | 0.01               | 0.01               |
| <b>Eastern Asia (mean and st. dev.)</b>                       | <b>0.85</b>        | <b>0.90</b>        | <b>0.93</b>        | <b>0.96</b>        | <b>0.96</b>        | <b>0.97</b>        | <b>0.97</b>        | <b>0.04</b>        | <b>0.03</b>        | <b>0.02</b>        | <b>0.01</b>        | <b>0.01</b>        | <b>0.01</b>        | <b>0.01</b>        |
| Arizona                                                       | 0.93               | 0.96               | 0.97               | 0.98               | 0.98               | 0.99               | 0.99               | 0.01               | 0.01               | 0.01               | 0.00               | 0.00               | 0.00               | 0.00               |
| <b>North America (mean and st. dev.)</b>                      | <b>0.93</b>        | <b>0.96</b>        | <b>0.97</b>        | <b>0.98</b>        | <b>0.98</b>        | <b>0.99</b>        | <b>0.99</b>        | <b>0.01</b>        | <b>0.01</b>        | <b>0.01</b>        | <b>0.00</b>        | <b>0.00</b>        | <b>0.00</b>        | <b>0.00</b>        |
| Atacama                                                       | 0.89               | 0.93               | 0.94               | 0.97               | 0.97               | 0.98               | 0.98               | 0.03               | 0.02               | 0.02               | 0.01               | 0.01               | 0.01               | 0.01               |
| Patagonia                                                     | 0.88               | 0.91               | 0.94               | 0.96               | 0.97               | 0.98               | 0.98               | 0.02               | 0.02               | 0.01               | 0.01               | 0.01               | 0.00               | 0.01               |
| <b>South America (mean and st. dev.)</b>                      | <b>0.89</b>        | <b>0.92</b>        | <b>0.94</b>        | <b>0.96</b>        | <b>0.97</b>        | <b>0.98</b>        | <b>0.98</b>        | <b>0.00</b>        | <b>0.01</b>        | <b>0.00</b>        | <b>0.00</b>        | <b>0.00</b>        | <b>0.00</b>        | <b>0.00</b>        |
| Namib <sub>-1</sub>                                           | 0.91               | 0.95               | 0.96               | 0.98               | 0.98               | 0.99               | 0.99               | 0.02               | 0.01               | 0.01               | 0.00               | 0.00               | 0.00               | 0.00               |
| Namib <sub>-2</sub>                                           | 0.74               | 0.82               | 0.86               | 0.92               | 0.94               | 0.96               | 0.97               | 0.03               | 0.02               | 0.02               | 0.01               | 0.01               | 0.01               | 0.01               |
| <b>Southern Africa (mean and st. dev.)</b>                    | <b>0.83</b>        | <b>0.88</b>        | <b>0.91</b>        | <b>0.95</b>        | <b>0.96</b>        | <b>0.98</b>        | <b>0.98</b>        | <b>0.12</b>        | <b>0.09</b>        | <b>0.07</b>        | <b>0.04</b>        | <b>0.03</b>        | <b>0.02</b>        | <b>0.02</b>        |
| Australia                                                     | 0.70               | 0.81               | 0.85               | 0.91               | 0.93               | 0.96               | 0.97               | 0.04               | 0.03               | 0.02               | 0.01               | 0.01               | 0.01               | 0.01               |
| <b>Australia (mean and st. dev.)</b>                          | <b>0.70</b>        | <b>0.81</b>        | <b>0.85</b>        | <b>0.91</b>        | <b>0.93</b>        | <b>0.96</b>        | <b>0.97</b>        | <b>0.04</b>        | <b>0.03</b>        | <b>0.02</b>        | <b>0.01</b>        | <b>0.01</b>        | <b>0.01</b>        | <b>0.01</b>        |
|                                                               |                    |                    |                    |                    |                    |                    |                    |                    |                    |                    |                    |                    |                    |                    |
| <b>Full dataset (mean and st. dev.)</b>                       | <b>0.85</b>        | <b>0.91</b>        | <b>0.93</b>        | <b>0.96</b>        | <b>0.96</b>        | <b>0.97</b>        | <b>0.98</b>        | <b>0.08</b>        | <b>0.05</b>        | <b>0.04</b>        | <b>0.03</b>        | <b>0.02</b>        | <b>0.01</b>        | <b>0.01</b>        |
| <b>Full dataset median</b>                                    | <b>0.88</b>        | <b>0.92</b>        | <b>0.94</b>        | <b>0.96</b>        | <b>0.97</b>        | <b>0.98</b>        | <b>0.98</b>        |                    |                    |                    |                    |                    |                    |                    |
| <b>Full dataset 10% percentile</b>                            | <b>0.74</b>        | <b>0.84</b>        | <b>0.88</b>        | <b>0.92</b>        | <b>0.94</b>        | <b>0.96</b>        | <b>0.96</b>        |                    |                    |                    |                    |                    |                    |                    |
| <b>Full dataset 90% percentile</b>                            | <b>0.93</b>        | <b>0.96</b>        | <b>0.97</b>        | <b>0.98</b>        | <b>0.99</b>        | <b>0.99</b>        | <b>0.99</b>        |                    |                    |                    |                    |                    |                    |                    |

1304



1305 **Table 6.** Results of the linear fit between  $k$  and SSA and the mass concentration of iron oxides,  $MC_{Fe-ox\%}$ ,  
1306  $MC_{Hem\%}$ , hematite,  $MC_{Hem\%}$ , goethite,  $MC_{Goeth\%}$ , and elemental iron,  $MC_{Fe\%}$  in dust. Column 1 indicates the  
1307 wavelength;  $(a \pm \sigma_a)$  indicates the retrieved slope and its estimated uncertainty;  $(b \pm \sigma_b)$  indicates the  
1308 retrieved intercept and its estimated uncertainty;  $R^2$  denotes the correlation coefficient and  $\chi^2_{red}$  is the  
1309 reduced chi-square of the fit.

| $k = a MC_{Fe-ox\%} + b$ |                          |                         |                     |                            |                   |                     | $SSA = a MC_{Fe-ox\%} + b$ |                         |                         |                     |                           |                   |                     |
|--------------------------|--------------------------|-------------------------|---------------------|----------------------------|-------------------|---------------------|----------------------------|-------------------------|-------------------------|---------------------|---------------------------|-------------------|---------------------|
| Wavelength (nm)          | $a \pm \sigma_a$         | $b \pm \sigma_b$        | $R^2; \chi^2_{red}$ | $a \pm \sigma_a$           | $b \pm \sigma_b$  | $R^2; \chi^2_{red}$ | Wavelength (nm)            | $a \pm \sigma_a$        | $b \pm \sigma_b$        | $R^2; \chi^2_{red}$ | $a \pm \sigma_a$          | $b \pm \sigma_b$  | $R^2; \chi^2_{red}$ |
| 370                      | $(11.9 \pm 2.4) 10^{-4}$ | $(2.4 \pm 4.6) 10^{-4}$ | 0.88 ; 0.6          | $(-5.8 \pm 0.8) 10^{-2}$   | $(1.00 \pm 0.02)$ | 0.83 ; 1.7          | 370                        | $(9.7 \pm 2.7) 10^{-4}$ | $(2.7 \pm 4.0) 10^{-4}$ | 0.67 ; 1.9          | $(-4.4 \pm 0.6) 10^{-2}$  | $(0.95 \pm 0.01)$ | 0.73 ; 3.5          |
| 470                      | $(9.0 \pm 1.7) 10^{-4}$  | $(1.7 \pm 3.2) 10^{-4}$ | 0.89 ; 0.8          | $(-3.8 \pm 0.6) 10^{-2}$   | $(1.00 \pm 0.01)$ | 0.78 ; 1.8          | 470                        | $(8.3 \pm 1.9) 10^{-4}$ | $(1.9 \pm 2.7) 10^{-4}$ | 0.72 ; 1.9          | $(-3.0 \pm 0.4) 10^{-2}$  | $(0.97 \pm 0.01)$ | 0.76 ; 3.2          |
| 520                      | $(6.8 \pm 1.3) 10^{-4}$  | $(1.3 \pm 2.4) 10^{-4}$ | 0.90 ; 0.9          | $(-2.9 \pm 0.4) 10^{-2}$   | $(1.01 \pm 0.01)$ | 0.76 ; 2.0          | 520                        | $(6.9 \pm 1.5) 10^{-4}$ | $(1.5 \pm 2.0) 10^{-4}$ | 0.74 ; 2.0          | $(-2.2 \pm 0.3) 10^{-2}$  | $(0.98 \pm 0.00)$ | 0.78 ; 3.3          |
| 590                      | $(4.5 \pm 0.9) 10^{-4}$  | $(0.9 \pm 1.6) 10^{-4}$ | 0.85 ; 1.4          | $(-1.8 \pm 0.3) 10^{-2}$   | $(1.00 \pm 0.01)$ | 0.75 ; 2.3          | 590                        | $(3.7 \pm 0.8) 10^{-4}$ | $(0.9 \pm 1.2) 10^{-4}$ | 0.61 ; 2.1          | $(-1.3 \pm 0.2) 10^{-2}$  | $(0.99 \pm 0.00)$ | 0.71 ; 2.7          |
| 660                      | $(4.3 \pm 0.8) 10^{-4}$  | $(0.8 \pm 1.4) 10^{-4}$ | 0.81 ; 1.6          | $(-1.3 \pm 0.2) 10^{-2}$   | $(1.00 \pm 0.00)$ | 0.75 ; 2.2          | 660                        | $(3.7 \pm 0.8) 10^{-4}$ | $(0.8 \pm 1.1) 10^{-4}$ | 0.51 ; 2.6          | $(-0.9 \pm 0.2) 10^{-2}$  | $(0.99 \pm 0.00)$ | 0.62 ; 2.5          |
| 880                      | $(3.4 \pm 0.6) 10^{-4}$  | $(0.6 \pm 1.2) 10^{-4}$ | 0.79 ; 1.0          | $(-0.76 \pm 0.16) 10^{-2}$ | $(1.00 \pm 0.00)$ | 0.79 ; 1.4          | 880                        | $(2.9 \pm 0.7) 10^{-4}$ | $(0.7 \pm 1.1) 10^{-4}$ | 0.43 ; 2.1          | $(-0.6 \pm 0.1) 10^{-2}$  | $(0.99 \pm 0.00)$ | 0.57 ; 1.8          |
| 950                      | $(3.2 \pm 0.6) 10^{-4}$  | $(0.6 \pm 1.0) 10^{-4}$ | 0.77 ; 1.1          | $(-0.62 \pm 0.13) 10^{-2}$ | $(0.99 \pm 0.00)$ | 0.78 ; 1.1          | 950                        | $(2.6 \pm 0.6) 10^{-4}$ | $(0.6 \pm 0.9) 10^{-4}$ | 0.46 ; 2.1          | $(-0.5 \pm 0.1) 10^{-2}$  | $(0.99 \pm 0.00)$ | 0.49 ; 1.7          |
| $k = a MC_{Hem\%} + b$   |                          |                         |                     |                            |                   |                     | $SSA = a MC_{Hem\%} + b$   |                         |                         |                     |                           |                   |                     |
| Wavelength (nm)          | $a \pm \sigma_a$         | $b \pm \sigma_b$        | $R^2; \chi^2_{red}$ | $a \pm \sigma_a$           | $b \pm \sigma_b$  | $R^2; \chi^2_{red}$ | Wavelength (nm)            | $a \pm \sigma_a$        | $b \pm \sigma_b$        | $R^2; \chi^2_{red}$ | $a \pm \sigma_a$          | $b \pm \sigma_b$  | $R^2; \chi^2_{red}$ |
| 370                      | $(9.7 \pm 2.7) 10^{-4}$  | $(2.7 \pm 4.0) 10^{-4}$ | 0.67 ; 1.9          | $(-4.4 \pm 0.6) 10^{-2}$   | $(0.95 \pm 0.01)$ | 0.73 ; 3.5          | 370                        | $(9.0 \pm 2.5) 10^{-4}$ | $(2.5 \pm 2.2) 10^{-4}$ | 0.47 ; 1.8          | $(-13.4 \pm 6.9) 10^{-3}$ | $(0.90 \pm 0.01)$ | 0.32 ; 6.8          |
| 470                      | $(8.3 \pm 1.9) 10^{-4}$  | $(1.9 \pm 2.7) 10^{-4}$ | 0.72 ; 1.9          | $(-3.0 \pm 0.4) 10^{-2}$   | $(0.97 \pm 0.01)$ | 0.76 ; 3.2          | 470                        | $(5.5 \pm 1.7) 10^{-4}$ | $(1.7 \pm 1.5) 10^{-4}$ | 0.43 ; 2.3          | $(-8.3 \pm 4.7) 10^{-3}$  | $(0.94 \pm 0.00)$ | 0.21 ; 6.2          |
| 520                      | $(6.9 \pm 1.5) 10^{-4}$  | $(1.5 \pm 2.0) 10^{-4}$ | 0.74 ; 2.0          | $(-2.2 \pm 0.3) 10^{-2}$   | $(0.98 \pm 0.00)$ | 0.78 ; 3.3          | 520                        | $(3.4 \pm 1.1) 10^{-4}$ | $(1.1 \pm 1.2) 10^{-4}$ | 0.41 ; 2.5          | $(-4.9 \pm 3.2) 10^{-3}$  | $(0.96 \pm 0.00)$ | 0.17 ; 6.4          |
| 590                      | $(3.7 \pm 0.8) 10^{-4}$  | $(0.9 \pm 1.2) 10^{-4}$ | 0.61 ; 2.1          | $(-1.3 \pm 0.2) 10^{-2}$   | $(0.99 \pm 0.00)$ | 0.71 ; 2.7          | 590                        | $(0.5 \pm 0.6) 10^{-4}$ | $(0.6 \pm 0.8) 10^{-4}$ | 0.50 ; 3.2          | $(0.9 \pm 2.0) 10^{-3}$   | $(0.97 \pm 0.00)$ | 0.23 ; 5.5          |
| 660                      | $(3.7 \pm 0.8) 10^{-4}$  | $(0.8 \pm 1.1) 10^{-4}$ | 0.51 ; 2.6          | $(-0.9 \pm 0.2) 10^{-2}$   | $(0.99 \pm 0.00)$ | 0.62 ; 2.5          | 660                        | $(2.2 \pm 0.8) 10^{-4}$ | $(0.8 \pm 0.7) 10^{-4}$ | 0.55 ; 3.6          | $(0.2 \pm 1.6) 10^{-3}$   | $(0.98 \pm 0.00)$ | 0.34 ; 4.4          |
| 880                      | $(2.9 \pm 0.7) 10^{-4}$  | $(0.7 \pm 1.1) 10^{-4}$ | 0.43 ; 2.1          | $(-0.6 \pm 0.1) 10^{-2}$   | $(0.99 \pm 0.00)$ | 0.57 ; 1.8          | 880                        | $(2.6 \pm 0.8) 10^{-4}$ | $(0.8 \pm 0.6) 10^{-4}$ | 0.62 ; 2.4          | $(-1.1 \pm 1.4) 10^{-3}$  | $(0.98 \pm 0.00)$ | 0.47 ; 3.0          |
| 950                      | $(2.6 \pm 0.6) 10^{-4}$  | $(0.6 \pm 0.9) 10^{-4}$ | 0.46 ; 2.1          | $(-0.5 \pm 0.1) 10^{-2}$   | $(0.99 \pm 0.00)$ | 0.49 ; 1.7          | 950                        | $(2.6 \pm 0.8) 10^{-4}$ | $(0.8 \pm 0.6) 10^{-4}$ | 0.55 ; 2.5          | $(-2.1 \pm 1.4) 10^{-3}$  | $(0.98 \pm 0.00)$ | 0.54 ; 2.6          |
| $k = a MC_{Goeth\%} + b$ |                          |                         |                     |                            |                   |                     | $SSA = a MC_{Goeth\%} + b$ |                         |                         |                     |                           |                   |                     |
| Wavelength (nm)          | $a \pm \sigma_a$         | $b \pm \sigma_b$        | $R^2; \chi^2_{red}$ | $a \pm \sigma_a$           | $b \pm \sigma_b$  | $R^2; \chi^2_{red}$ | Wavelength (nm)            | $a \pm \sigma_a$        | $b \pm \sigma_b$        | $R^2; \chi^2_{red}$ | $a \pm \sigma_a$          | $b \pm \sigma_b$  | $R^2; \chi^2_{red}$ |
| 370                      | $(9.0 \pm 2.5) 10^{-4}$  | $(2.5 \pm 2.2) 10^{-4}$ | 0.47 ; 1.8          | $(-13.4 \pm 6.9) 10^{-3}$  | $(0.90 \pm 0.01)$ | 0.32 ; 6.8          | 370                        | $(6.0 \pm 1.4) 10^{-4}$ | $(1.4 \pm 0.7) 10^{-4}$ | 0.60 ; 1.5          | $(-2.7 \pm 0.4) 10^{-2}$  | $(1.02 \pm 0.02)$ | 0.67 ; 3.1          |
| 470                      | $(5.5 \pm 1.7) 10^{-4}$  | $(1.7 \pm 1.5) 10^{-4}$ | 0.43 ; 2.3          | $(-8.3 \pm 4.7) 10^{-3}$   | $(0.94 \pm 0.00)$ | 0.21 ; 6.2          | 470                        | $(4.7 \pm 1.0) 10^{-4}$ | $(1.0 \pm 0.5) 10^{-4}$ | 0.62 ; 1.7          | $(-1.8 \pm 0.3) 10^{-2}$  | $(1.02 \pm 0.01)$ | 0.72 ; 2.8          |
| 520                      | $(3.4 \pm 1.1) 10^{-4}$  | $(1.1 \pm 1.2) 10^{-4}$ | 0.41 ; 2.5          | $(-4.9 \pm 3.2) 10^{-3}$   | $(0.96 \pm 0.00)$ | 0.17 ; 6.4          | 520                        | $(3.9 \pm 0.8) 10^{-4}$ | $(0.8 \pm 3.9) 10^{-4}$ | 0.65 ; 1.6          | $(-1.3 \pm 0.2) 10^{-2}$  | $(1.01 \pm 0.01)$ | 0.72 ; 2.9          |
| 590                      | $(0.5 \pm 0.6) 10^{-4}$  | $(0.6 \pm 0.8) 10^{-4}$ | 0.50 ; 3.2          | $(0.9 \pm 2.0) 10^{-3}$    | $(0.97 \pm 0.00)$ | 0.23 ; 5.5          | 590                        | $(2.5 \pm 0.5) 10^{-4}$ | $(0.5 \pm 2.4) 10^{-4}$ | 0.56 ; 1.7          | $(-0.8 \pm 0.1) 10^{-2}$  | $(1.01 \pm 0.01)$ | 0.70 ; 2.4          |
| 660                      | $(2.2 \pm 0.8) 10^{-4}$  | $(0.8 \pm 0.7) 10^{-4}$ | 0.55 ; 3.6          | $(0.2 \pm 1.6) 10^{-3}$    | $(0.98 \pm 0.00)$ | 0.34 ; 4.4          | 660                        | $(2.0 \pm 0.4) 10^{-4}$ | $(0.4 \pm 1.7) 10^{-4}$ | 0.48 ; 1.9          | $(-0.5 \pm 0.1) 10^{-2}$  | $(1.00 \pm 0.00)$ | 0.62 ; 2.0          |
| 880                      | $(2.6 \pm 0.8) 10^{-4}$  | $(0.8 \pm 0.6) 10^{-4}$ | 0.62 ; 2.4          | $(-1.1 \pm 1.4) 10^{-3}$   | $(0.98 \pm 0.00)$ | 0.47 ; 3.0          | 880                        | $(1.8 \pm 0.4) 10^{-4}$ | $(0.4 \pm 2.0) 10^{-4}$ | 0.40 ; 1.8          | $(-0.4 \pm 0.1) 10^{-2}$  | $(1.00 \pm 0.00)$ | 0.54 ; 1.6          |
| 950                      | $(2.6 \pm 0.8) 10^{-4}$  | $(0.8 \pm 0.6) 10^{-4}$ | 0.55 ; 2.5          | $(-2.1 \pm 1.4) 10^{-3}$   | $(0.98 \pm 0.00)$ | 0.54 ; 2.6          |                            |                         |                         |                     |                           |                   |                     |
| $k = a MC_{Fe\%} + b$    |                          |                         |                     |                            |                   |                     | $SSA = a MC_{Fe\%} + b$    |                         |                         |                     |                           |                   |                     |
| Wavelength (nm)          | $a \pm \sigma_a$         | $b \pm \sigma_b$        | $R^2; \chi^2_{red}$ | $a \pm \sigma_a$           | $b \pm \sigma_b$  | $R^2; \chi^2_{red}$ | Wavelength (nm)            | $a \pm \sigma_a$        | $b \pm \sigma_b$        | $R^2; \chi^2_{red}$ | $a \pm \sigma_a$          | $b \pm \sigma_b$  | $R^2; \chi^2_{red}$ |
| 370                      | $(6.0 \pm 1.4) 10^{-4}$  | $(1.4 \pm 0.7) 10^{-4}$ | 0.60 ; 1.5          | $(-2.7 \pm 0.4) 10^{-2}$   | $(1.02 \pm 0.02)$ | 0.67 ; 3.1          | 370                        | $(6.0 \pm 1.4) 10^{-4}$ | $(1.4 \pm 0.7) 10^{-4}$ | 0.60 ; 1.5          | $(-2.7 \pm 0.4) 10^{-2}$  | $(1.02 \pm 0.02)$ | 0.67 ; 3.1          |
| 470                      | $(4.7 \pm 1.0) 10^{-4}$  | $(1.0 \pm 0.5) 10^{-4}$ | 0.62 ; 1.7          | $(-1.8 \pm 0.3) 10^{-2}$   | $(1.02 \pm 0.01)$ | 0.72 ; 2.8          | 470                        | $(4.7 \pm 1.0) 10^{-4}$ | $(1.0 \pm 0.5) 10^{-4}$ | 0.62 ; 1.7          | $(-1.8 \pm 0.3) 10^{-2}$  | $(1.02 \pm 0.01)$ | 0.72 ; 2.8          |
| 520                      | $(3.9 \pm 0.8) 10^{-4}$  | $(0.8 \pm 3.9) 10^{-4}$ | 0.65 ; 1.6          | $(-1.3 \pm 0.2) 10^{-2}$   | $(1.01 \pm 0.01)$ | 0.72 ; 2.9          | 520                        | $(3.9 \pm 0.8) 10^{-4}$ | $(0.8 \pm 3.9) 10^{-4}$ | 0.65 ; 1.6          | $(-1.3 \pm 0.2) 10^{-2}$  | $(1.01 \pm 0.01)$ | 0.72 ; 2.9          |
| 590                      | $(2.5 \pm 0.5) 10^{-4}$  | $(0.5 \pm 2.4) 10^{-4}$ | 0.56 ; 1.7          | $(-0.8 \pm 0.1) 10^{-2}$   | $(1.01 \pm 0.01)$ | 0.70 ; 2.4          | 590                        | $(2.5 \pm 0.5) 10^{-4}$ | $(0.5 \pm 2.4) 10^{-4}$ | 0.56 ; 1.7          | $(-0.8 \pm 0.1) 10^{-2}$  | $(1.01 \pm 0.01)$ | 0.70 ; 2.4          |
| 660                      | $(2.0 \pm 0.4) 10^{-4}$  | $(0.4 \pm 1.7) 10^{-4}$ | 0.48 ; 1.9          | $(-0.5 \pm 0.1) 10^{-2}$   | $(1.00 \pm 0.00)$ | 0.62 ; 2.0          | 660                        | $(2.0 \pm 0.4) 10^{-4}$ | $(0.4 \pm 1.7) 10^{-4}$ | 0.48 ; 1.9          | $(-0.5 \pm 0.1) 10^{-2}$  | $(1.00 \pm 0.00)$ | 0.62 ; 2.0          |
| 880                      | $(1.8 \pm 0.4) 10^{-4}$  | $(0.4 \pm 2.0) 10^{-4}$ | 0.40 ; 1.8          | $(-0.4 \pm 0.1) 10^{-2}$   | $(1.00 \pm 0.00)$ | 0.54 ; 1.6          | 880                        | $(1.8 \pm 0.4) 10^{-4}$ | $(0.4 \pm 2.0) 10^{-4}$ | 0.40 ; 1.8          | $(-0.4 \pm 0.1) 10^{-2}$  | $(1.00 \pm 0.00)$ | 0.54 ; 1.6          |

|     |                         |                         |            |                          |                   |            |
|-----|-------------------------|-------------------------|------------|--------------------------|-------------------|------------|
| 950 | $(1.4 \pm 0.3) 10^{-4}$ | $(0.3 \pm 1.4) 10^{-4}$ | 0.45 ; 2.0 | $(-0.3 \pm 0.1) 10^{-2}$ | $(1.00 \pm 0.00)$ | 0.49 ; 1.5 |
|-----|-------------------------|-------------------------|------------|--------------------------|-------------------|------------|

1310  
1311  
1312  
1313  
1314  
1315  
1316  
1317  
1318  
1319  
1320  
1321  
1322  
1323

**Figure 1.** Flowchart illustrating the procedure for data treatment and retrieval of physical and chemical (size, composition) and spectral optical properties (single scattering albedo, SSA, and complex refractive index) of mineral dust aerosols. In red we mention the different corrections performed and the values adopted in the calculations.

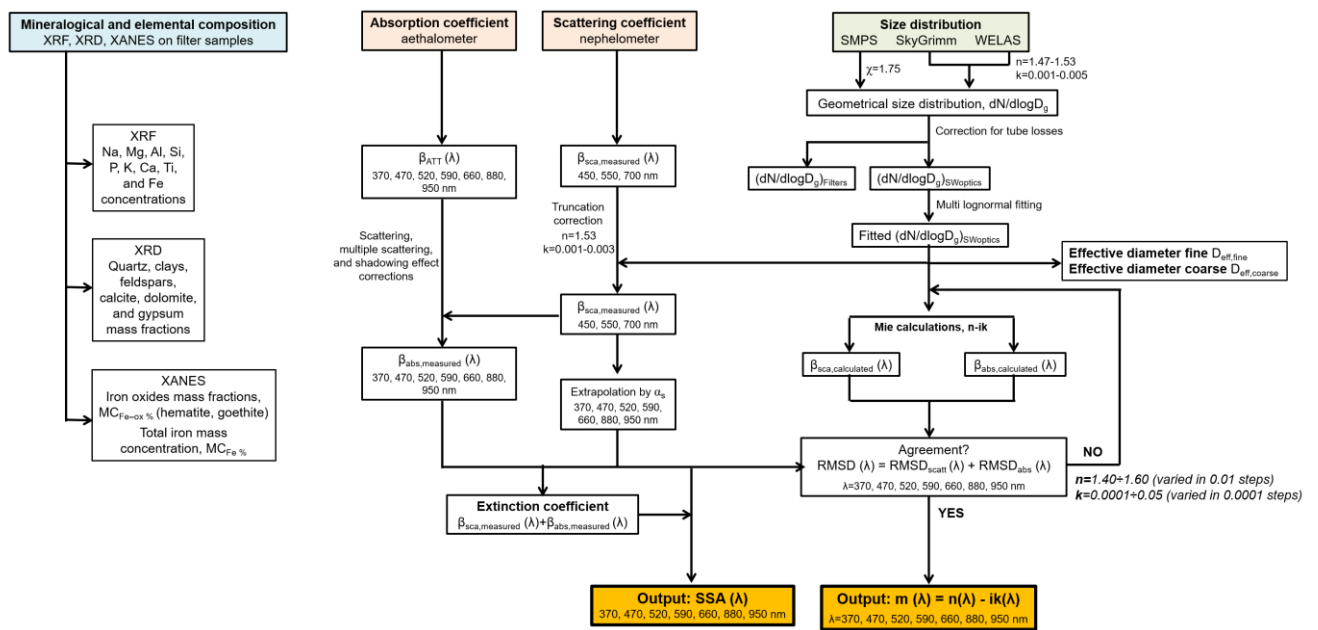

1325

1326

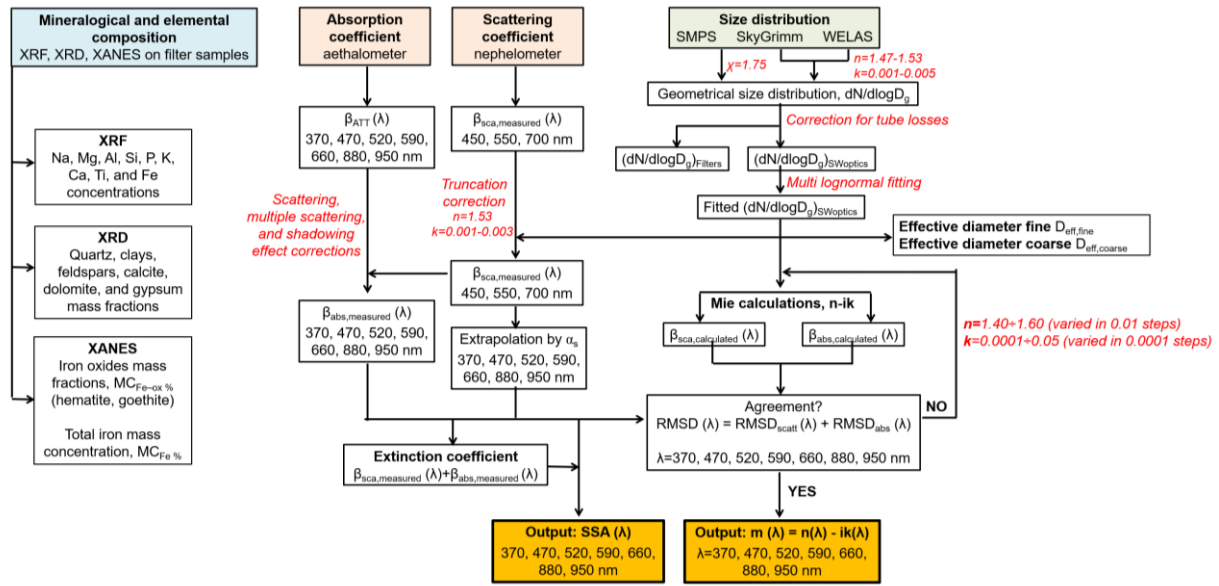

1327

1328

1329

1330

1331

1332

1333

1334

1335

1336

1337

1338

1339

1340

1341

**Figure 2.** Box and whisker plot showing the full variability of hematite and goethite mass fractions in the soils for the clay-sized (<2  $\mu\text{m}$  diameter) and silt-sized (<60  $\mu\text{m}$  diameter) soil fractions as retrieved from the global soil mineralogical database by Journet et al. (2014). The box and whisker plot include data for the nine desert source areas depicted in Ginoux et al. (2012) and DB17 (Northern Africa, Sahel, Eastern Africa and the Middle East, Central Asia, Eastern Asia, North America, South America, Southern Africa, and Australia). from the soil mineralogical database by Journet et al. (2014). in the dust source regions at the global scale by considering desert source areas as reported in Ginoux et al. (2012) and DB17. Data are from the soil mineralogical database by Journet et al. (2014). Dots indicate hematite and goethite soil content in clay-sized and silt-sized soils (always extracted from Journet et al.) extracted in correspondence to the geographical coordinates where the for the nineteen soils used in the CESAM experiments were collected. The Journet et al. database assumes that the iron oxides in the silt fraction consist only of goethite.

1342

1343

1344

1345

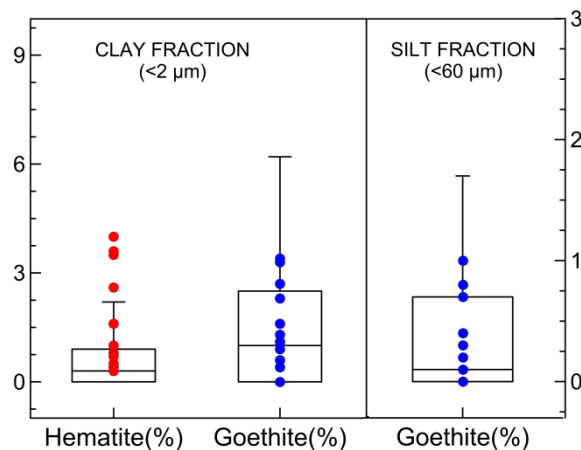

1342

1343

1344

1345

1346 **Figure 3.** Top panel: time series of the aerosol mass concentration (cross symbols) and effective fine  
1347 ( $D_{\text{eff, fine}}$ , open dots) and coarse diameter ( $D_{\text{eff, coarse}}$ , open squares) measured inside the CESAM cham-  
1348 ber (red symbols) and at the input of the SW instruments (black symbols) for one experiment (Morocco  
1349 dust). Bottom panel: time series of the scattering  $\beta_{\text{sca}}$  and absorption  $\beta_{\text{abs}}$  coefficients at 370 nm for the  
1350 same experiment. Mass concentrations are reported as 6-sec data, while all other quantities are 10-  
1351 min averages.

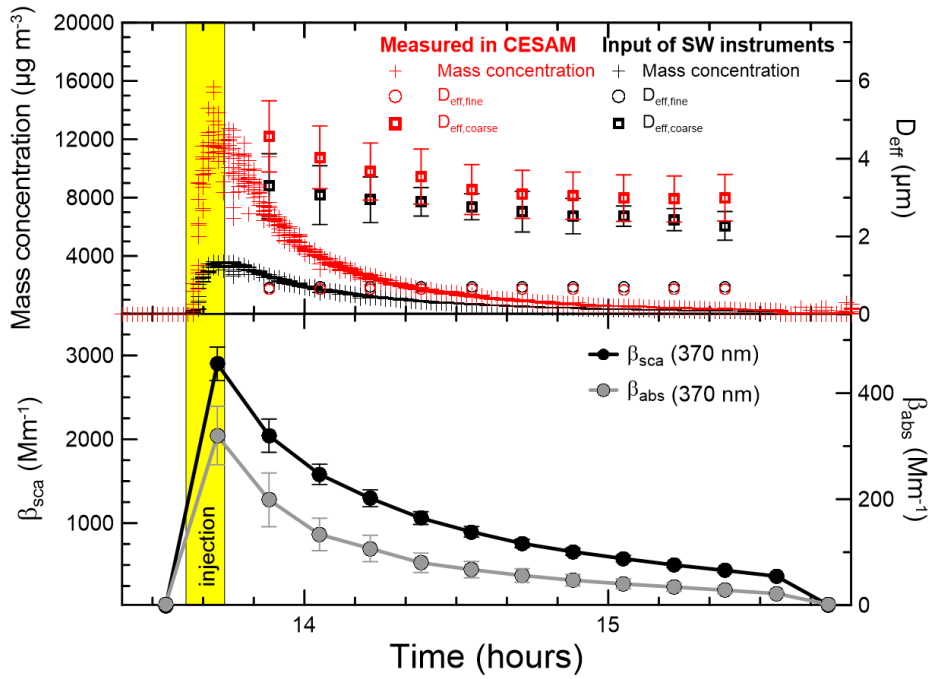

1352

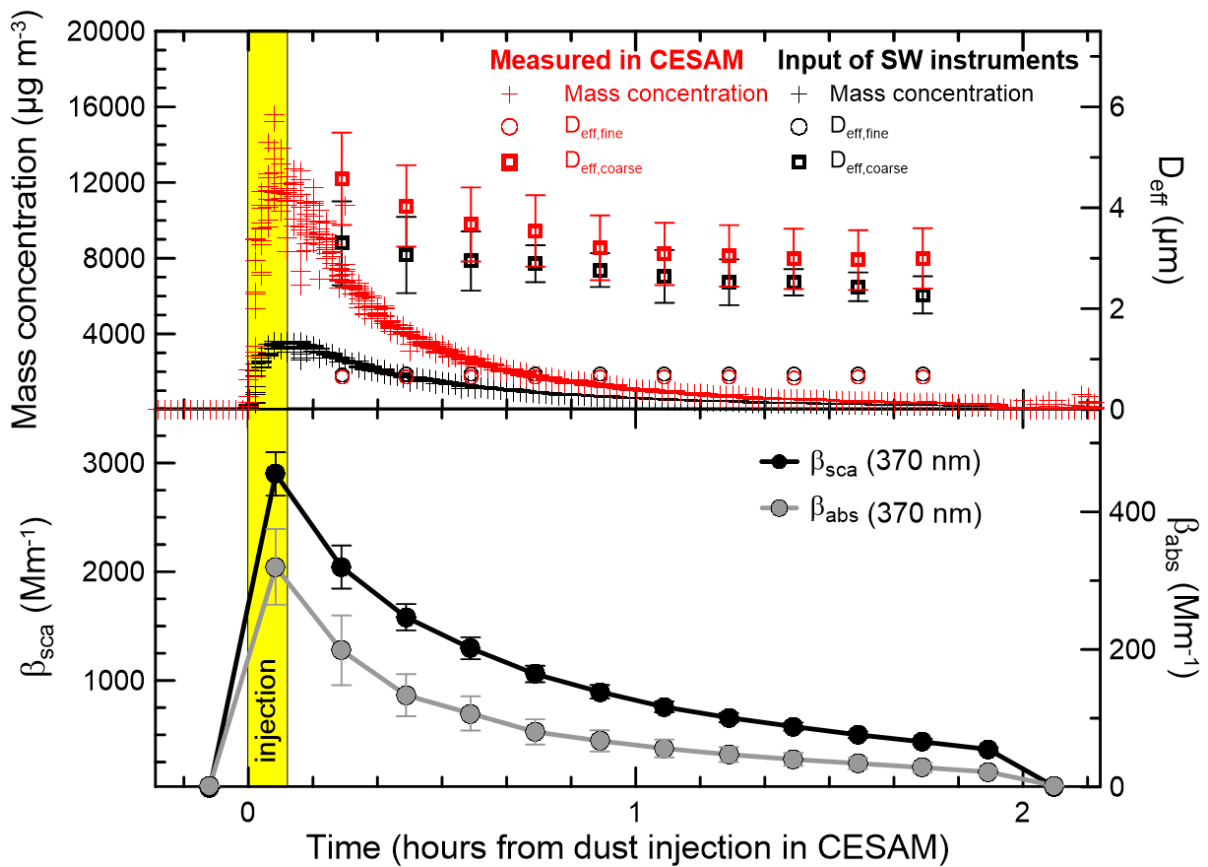

1353

1354

1355

1356

1357

1358



1359  
1360  
1361  
1362  
1363  
1364  
1365  
1366  
1367  
1368  
1369  
1370  
1371  
1372  
1373  
1374  
1375  
1376  
1377  
1378  
1379  
1380  
1381  
1382  
1383  
1384  
1385  
1386  
1387  
1388  
1389  
1390  
1391  
1392

**Figure 4.** Comparison of dust size distributions sensed by the SW optical instruments (behind the SW instruments inlet  $(dV/d\log D_g)_{SWoptics}$ ), with field data for long-range transported dust. The thick black line represents the mean value of  $(dV/d\log D_g)_{SWoptics}$  at the peak of the dust injection in CESAM for experiments with the different samples. The grey shaded area indicates the range of  $(dV/d\log D_g)_{SWoptics}$  for all samples. The dotted black line shows the average of the dust size distribution at the peak of the injection inside the CESAM chamber from DB17. Field data are from: Formenti et al. (2001) (CLAIRE campaign in Suriname, South America), Maring et al. (2003) and Denjean et al. (2016b) (PRIDE and DUST-ATTACK campaigns in Puerto Rico, Caribes), Müller et al. (2011), ~~and~~ Chen et al. (2011) and (Ryder et al. (2018) (SAMUM2, ~~and~~ NAMMA, and AER-D campaigns in Cape Verde, eastern Atlantic), and Weinzierl et al. (2017) (SALTRACE campaign, data from Barbados). For comparison, data taken close to the source in Niger from Formenti et al. (2011) during the AMMA campaign are also shown. SAL stands for Saharan Air Layer. All data are reported as volume size distributions normalised at the maximum.

*(The different acronyms spell out as: AER-D= AERosol Properties – Dust; AMMA = African Monsoon Multidisciplinary Analysis; CLARE= Cooperative LBA Airborne Regional Experiment; DUST-ATTACK+ Dust Aging and Transport from Africa to the Caribbean; NAMMA = NASA African Monsoon Multidisciplinary Analysis; PRIDE = Puerto Rico Dust Experiment; SALTRACE= Saharan Aerosol Long-range Transport and Aerosol-Cloud-Interaction Experiment; SAMUM = Saharan Mineral Dust Experiment).*

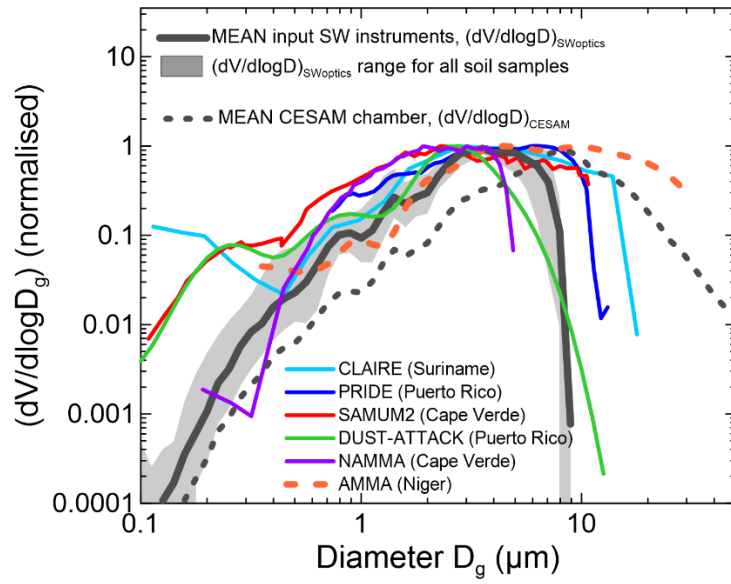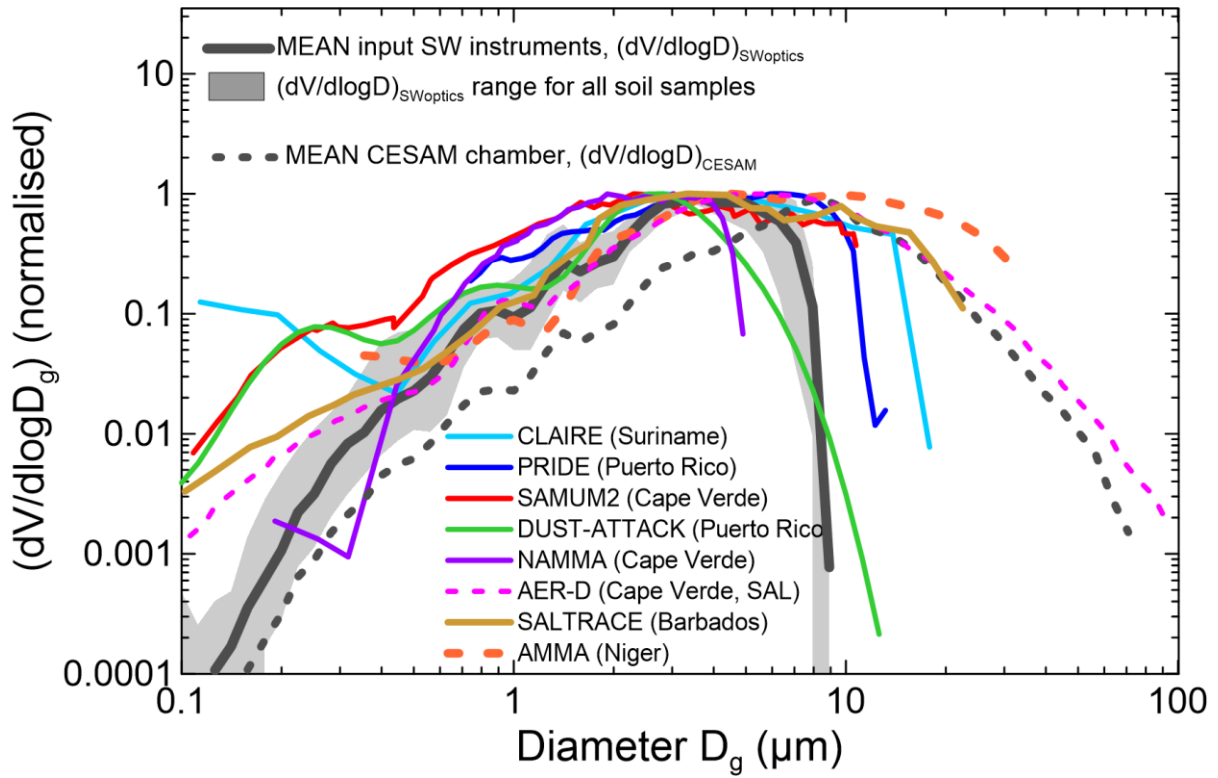

1405  
 1406  
 1407  
 1408  
 1409  
 1410  
 1411  
 1412  
 1413  
 1414  
 1415  
 1416  
 1417

**Figure 5.** Spectral extinction coefficient, absorption coefficient, SSA, and real (n) and imaginary (k) parts of the refractive index at the peak of the dust injection in the chamber and after 30 and 90 minutes for Morocco and Algeria dust samples. Data are reported at the seven aethalometer wavelengths (370, 470, 520, 590, 660, 880, and 950 nm) as 10-min averages. In the top panel we report the extinction calculated as the sum of scattering and absorption coefficients. For the sake of clarity error bars are not shown for SSA, n, and k data.

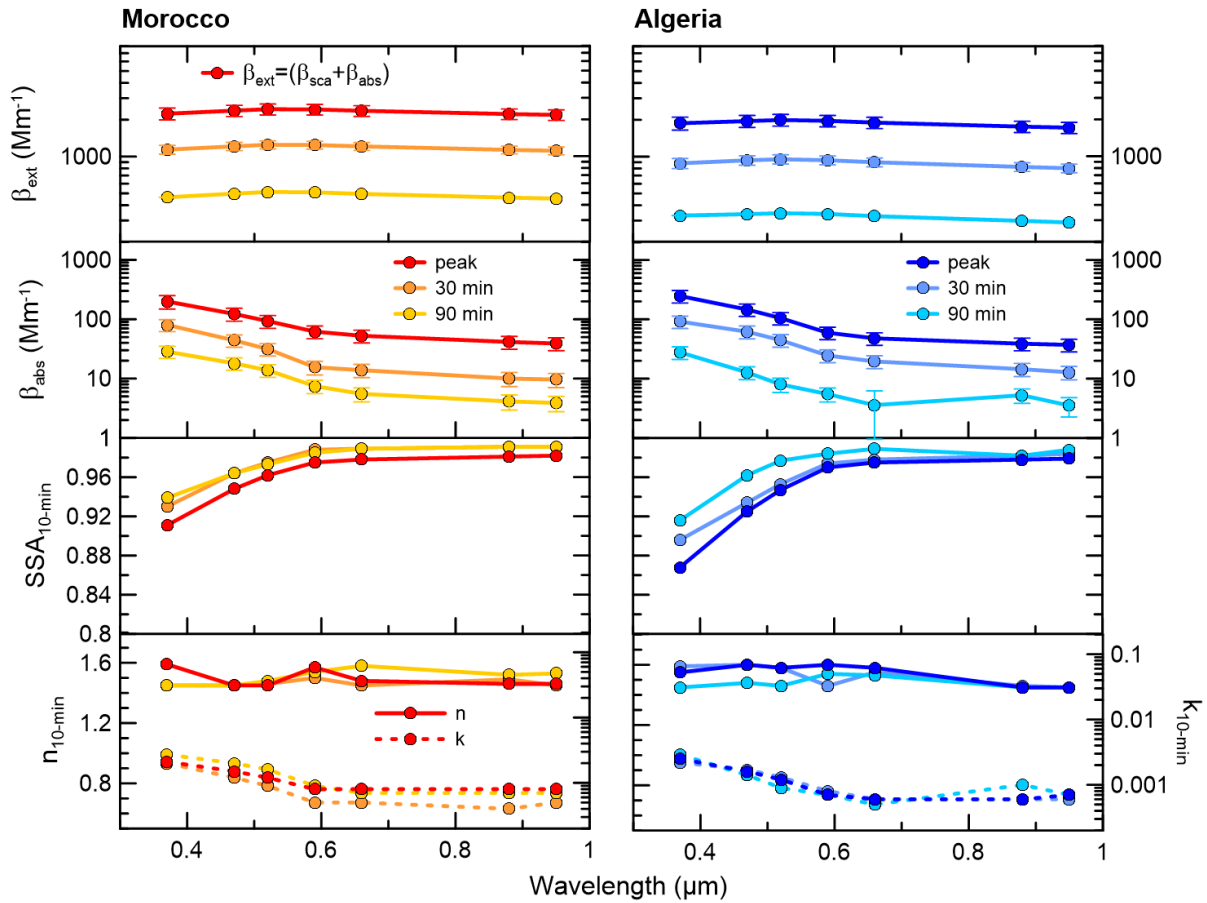

1418  
 1419  
 1420  
 1421  
 1422  
 1423  
 1424  
 1425

1426  
1427  
1428  
1429  
1430  
1431  
1432  
1433  
1434  
1435  
1436  
1437  
1438  
1439

**Figure 6.** ~~(a)~~ Real (n) and imaginary (k) parts of the dust complex refractive index ~~and (b) single scattering albedo ( $SSA_{AVG}$ )~~ at seven wavelengths between 370 and 950 nm obtained for the 19 aerosol samples analyzed in this study. Data ~~for the refractive index~~ correspond to the time average of the 10 min values obtained between the peak of the injection and 120 min later. The error bar corresponds to the absolute uncertainty in n and k, estimated to be <8% for n and between 13 and 75 % for k.  ~~$SSA_{AVG}$  data correspond to the fit of the 10 min values of  $\beta_{sca}$  versus  $\beta_{abs}$ , and the uncertainty is between 1% and 12% at 370 nm and between 1% and 3% at 950 nm.~~

a)

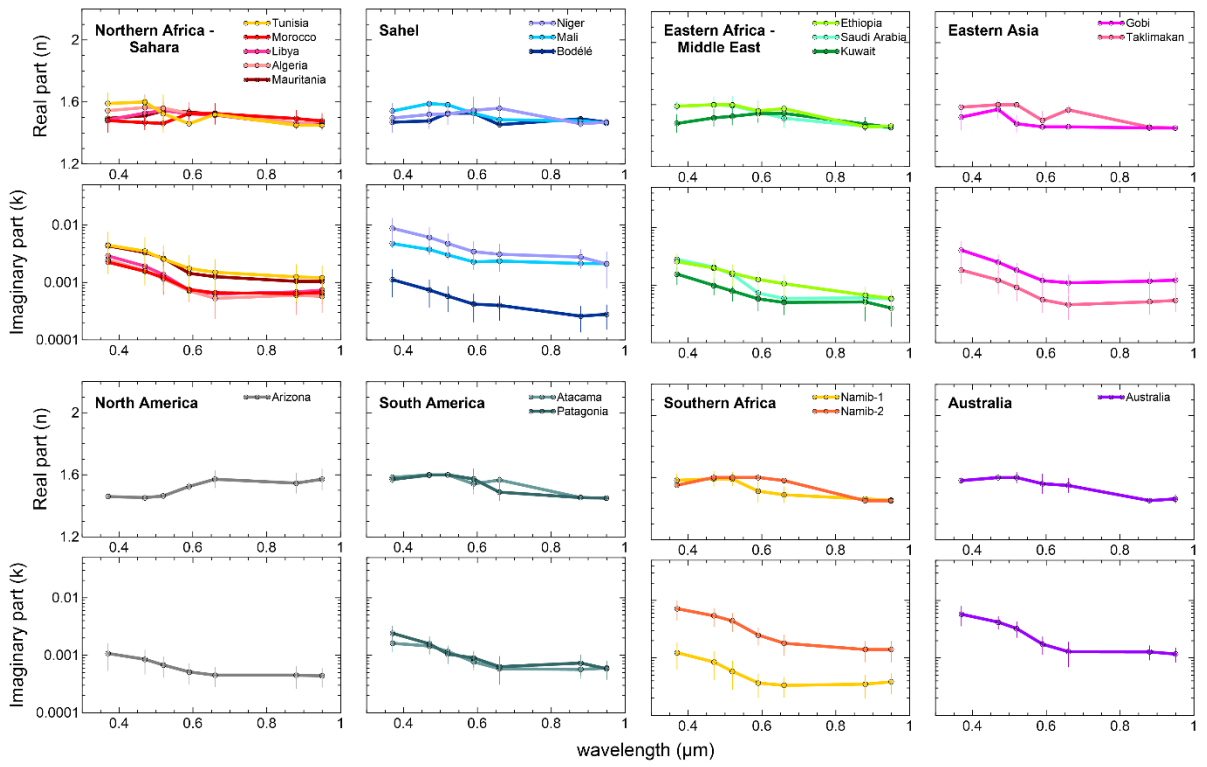

b)

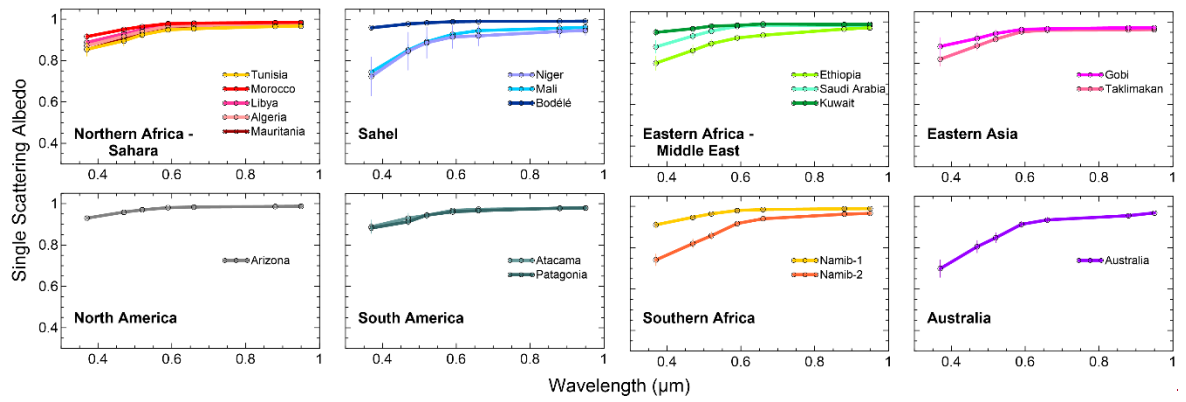



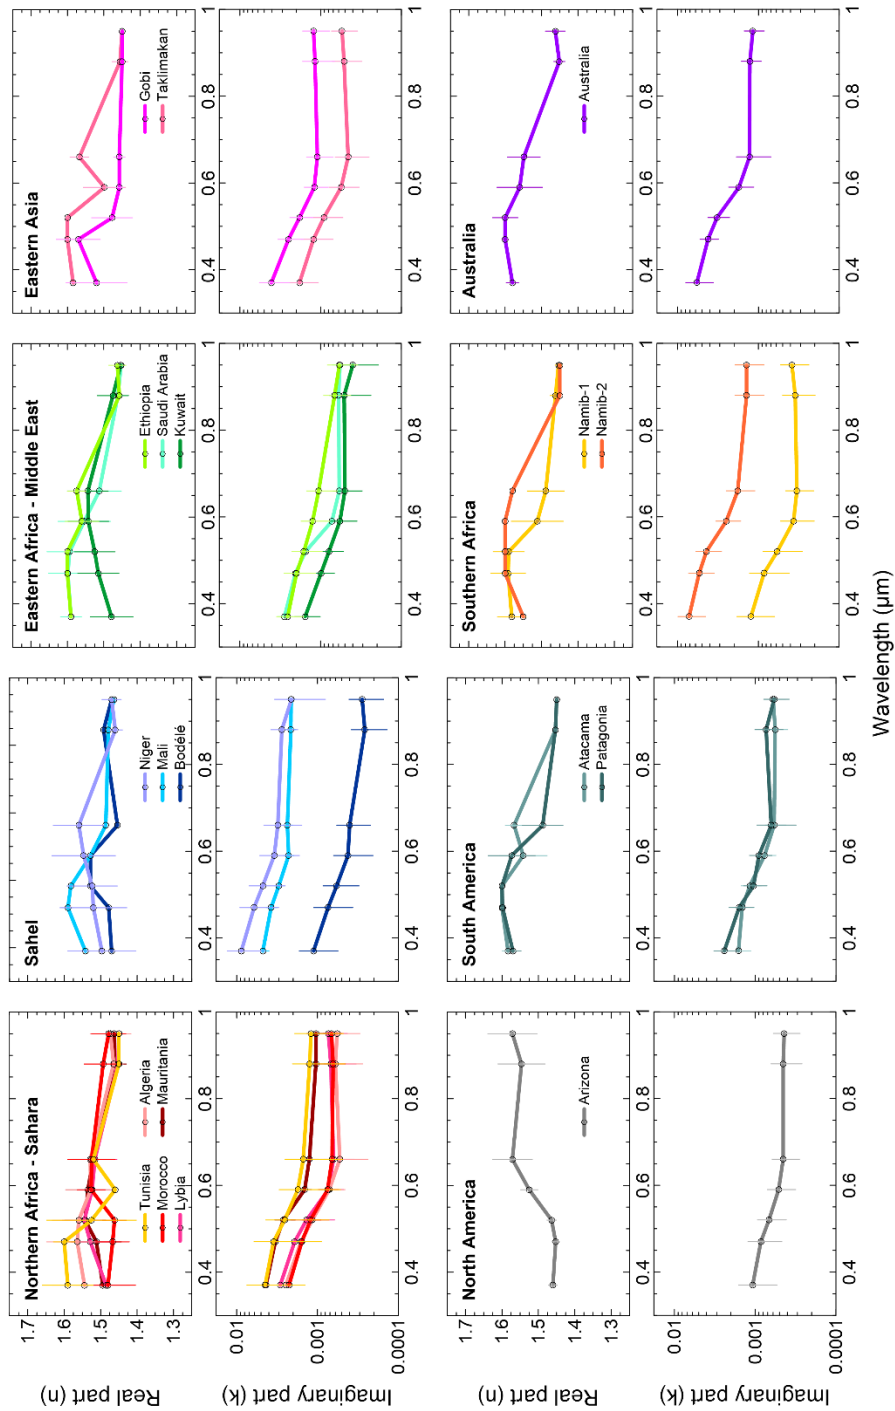

1441

1442

1443

1444

1445

1446

1447

1448

**Figure 7.** Single scattering albedo (SSA) at seven wavelengths between 370 and 950 nm obtained for the 19 aerosol samples analyzed in this study. Data correspond for each sample (with the exception of Tunisia and Namib-2, see Sect. 3.1) to the fit of the 10 min values of  $\beta_{\text{sca}}$  versus  $\beta_{\text{abs}}$ , and the uncertainty is between 1% and 12% at 370 nm and between 1% and 3% at 950 nm.

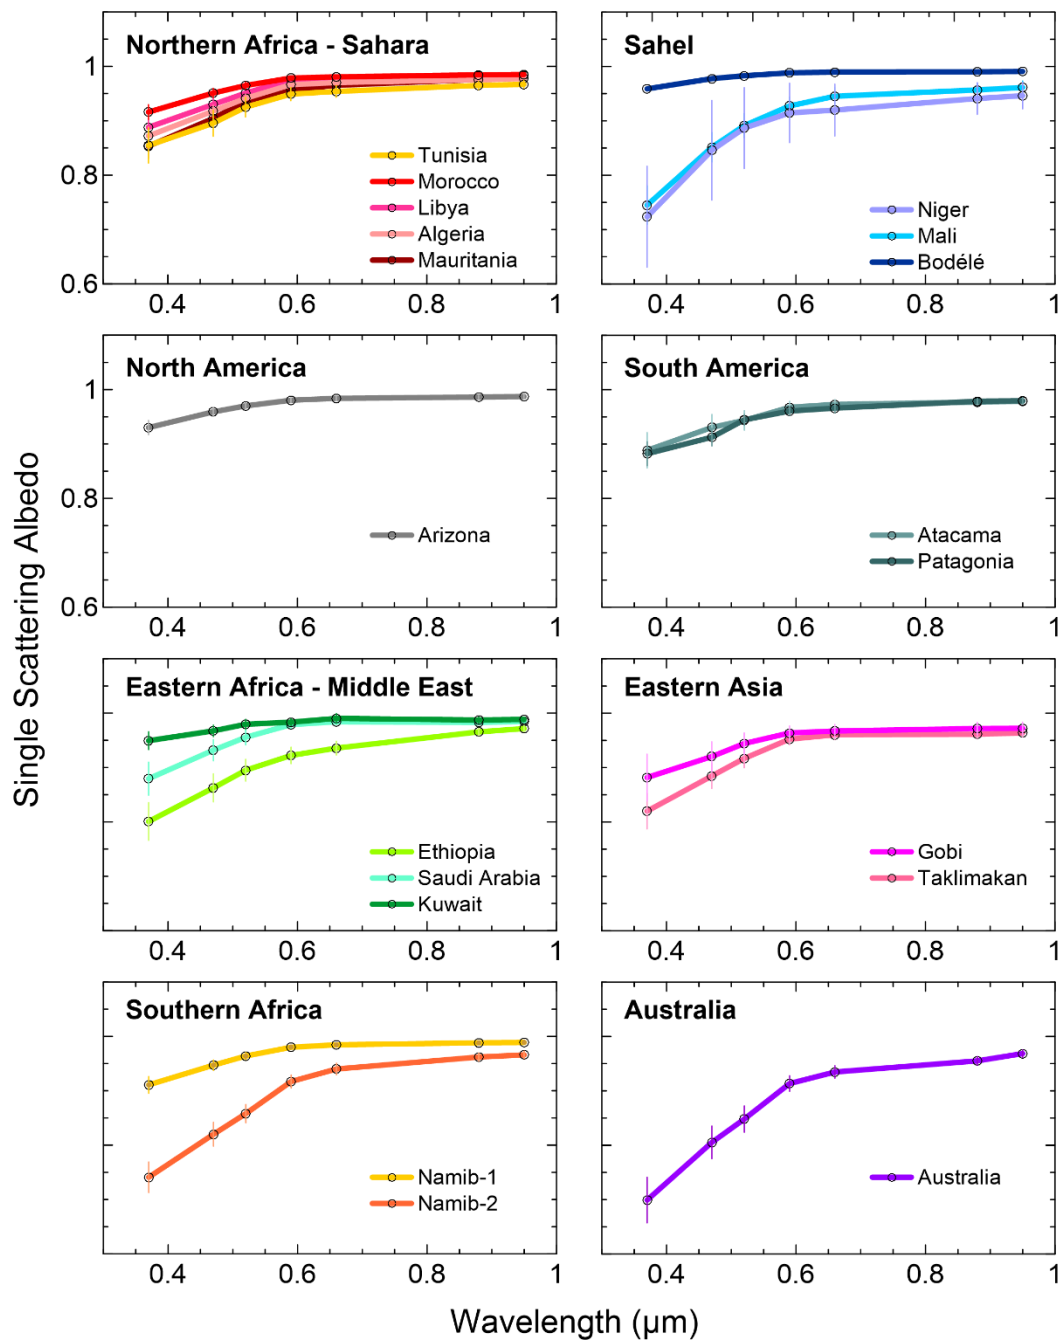

1449

1450

1451

1452

1453

1454 **Figure 87.** Comparison of results obtained in this study (a) with literature-compiled values (b) of the (a)  
 1455 dust real- and imaginary parts of the refractive index ( $n$ ,  $k$ ) and (b) single scattering albedo (SSA) in the  
 1456 SW spectral range. The regions in gray in panel (a) indicate the full range of variability obtained in  
 1457 this study, and the thick black lines are the means of  $n$ ,  $k$  and SSA obtained for the different aerosol  
 1458 samples. Literature values in panel (b) include estimates from ground-based and aircraft observations

1459 during field campaigns, laboratory studies, AERONET inversions, and estimates from dust mineralogi-  
1460 cal composition. Data are in some cases for the full dust size distribution, while in other only the fine  
1461 fraction below about 2  $\mu\text{m}$  is ~~measured-represented~~ (identified with \*).

1462 The main provenance of the dust and datasets from the literature is provided in the following: Volz et  
1463 al. (1972) is data for rainout dust collected in Germany; Patterson et al. (1977) is Saharan dust; Hess  
1464 et al. (1998) is data from the OPAC database; Colarco et al. (2002) is data for dust from Dakar, Sal,  
1465 and Tenerife; Dubovik et al. (2002) included data from Bahrain--Persian Gulf and Solar Village--Saudi  
1466 Arabia AERONET stations; Haywood et al. (2003) is dust from Mauritania; Sinyuk et al. (2003) is data  
1467 from Cape Verde, Dakar, and Burkina Faso; Clarke et al. (2004) is Asian dust offshore of China, Japan,  
1468 and Korea; Linke et al. (2006)--A is dust from Cairo; Linke et al. (2006)--B is dust from Morocco; Bal-  
1469 kanski et al (2007) is calculated from mineralogical composition assuming a 1.5% hematite mass frac-  
1470 tion in dust; Todd et al. (2007) is from Bodélé; Osborne et al. (2008) is from Niger; Otto et al. (2009),  
1471 Petzold et al. (2009), Schladitz et al. (2009), and Muller et al. (2010, 2011) is dust originated mostly in  
1472 Morocco; McConnell et al. (2008, 2010) is dust from Niger/Senegal; Chen et al. (2011) is dust from  
1473 Western Sahara; Formenti et al. (2011) in the k plot is an average of airborne observations for the  
1474 AMMA campaign in Niger, while for the SSA plot, Formenti et al. (2011)--A is from observations in the  
1475 Saharan Air Layer, --B is from Bodélé/Sudan, and --C is a Sahelian uplift episode; Johnson et al. (2011)  
1476 is dust from Western Sahara; Moosmüller et al. (2012) analysed samples from Middle East, Mali and  
1477 Spain, and here we report the average of their obtained values; Wagner et al. (2012) obtained k values  
1478 for several samples from ~~Cairo and Burkina Faso~~, Cairo and the SAMUM campaign and here we report  
1479 and the values for the maximum of their spectral k average of its results (Burkina Faso) and the mini-  
1480 mum (Cairo); Ryder et al. (2013) is dust from Western Sahara and Mauritania and we report in both k  
1481 and SSA plots the average of their observations; Engelbrecht et al. (2016) analysed many dust samples  
1482 from all over the world, here we report their ~~measured-estimated~~ minimum and maximum of the dust  
1483 SSA that are --A from California and --B from the Etosha Pan in Namibia; Steigmann and Yang (2017)  
1484 modelled the refractive index of dust based on assumed mineralogical compositions typical for Northern  
1485 and Southern Sahara and Western and Eastern Asia dust, and here we report the average of their  
1486 results for both n and k. Uncertainties in the field observations have been omitted for the sake of clarity.  
1487 The legend identifies the line styles used in the plots.

1488 *(The different acronyms spell out as (see also the caption of Fig. 4): AERONET = Aerosol Robotic*  
1489 *Network; OPAC = Optical Properties of Aerosols and Clouds; SHADE = Saharan Dust Experiment;*  
1490 *BODEX = The Bodélé Dust Experiment; DABEX = Dust and Biomass Experiment; SAMUM1 and*  
1491 *SAMUM2 refers to the two SAMUM campaigns in Morocco and Cape Verde, respectively, SAMUM =*  
1492 *Saharan Mineral Dust Experiment; DODO = Dust Outflow and Deposition to the Ocean; AMMA = Afri-*  
1493 *can Monsoon Multidisciplinary Analysis; NAMMA = NASA African Monsoon Multidisciplinary Analysis;*  
1494 *ACE--Asia = Asian Pacific Regional Aerosol Characterization Experiment; GERBILS = Geostationary*  
1495 *Earth Radiation Budget Intercomparison of Longwave and Shortwave radiation).*

1496  
1497

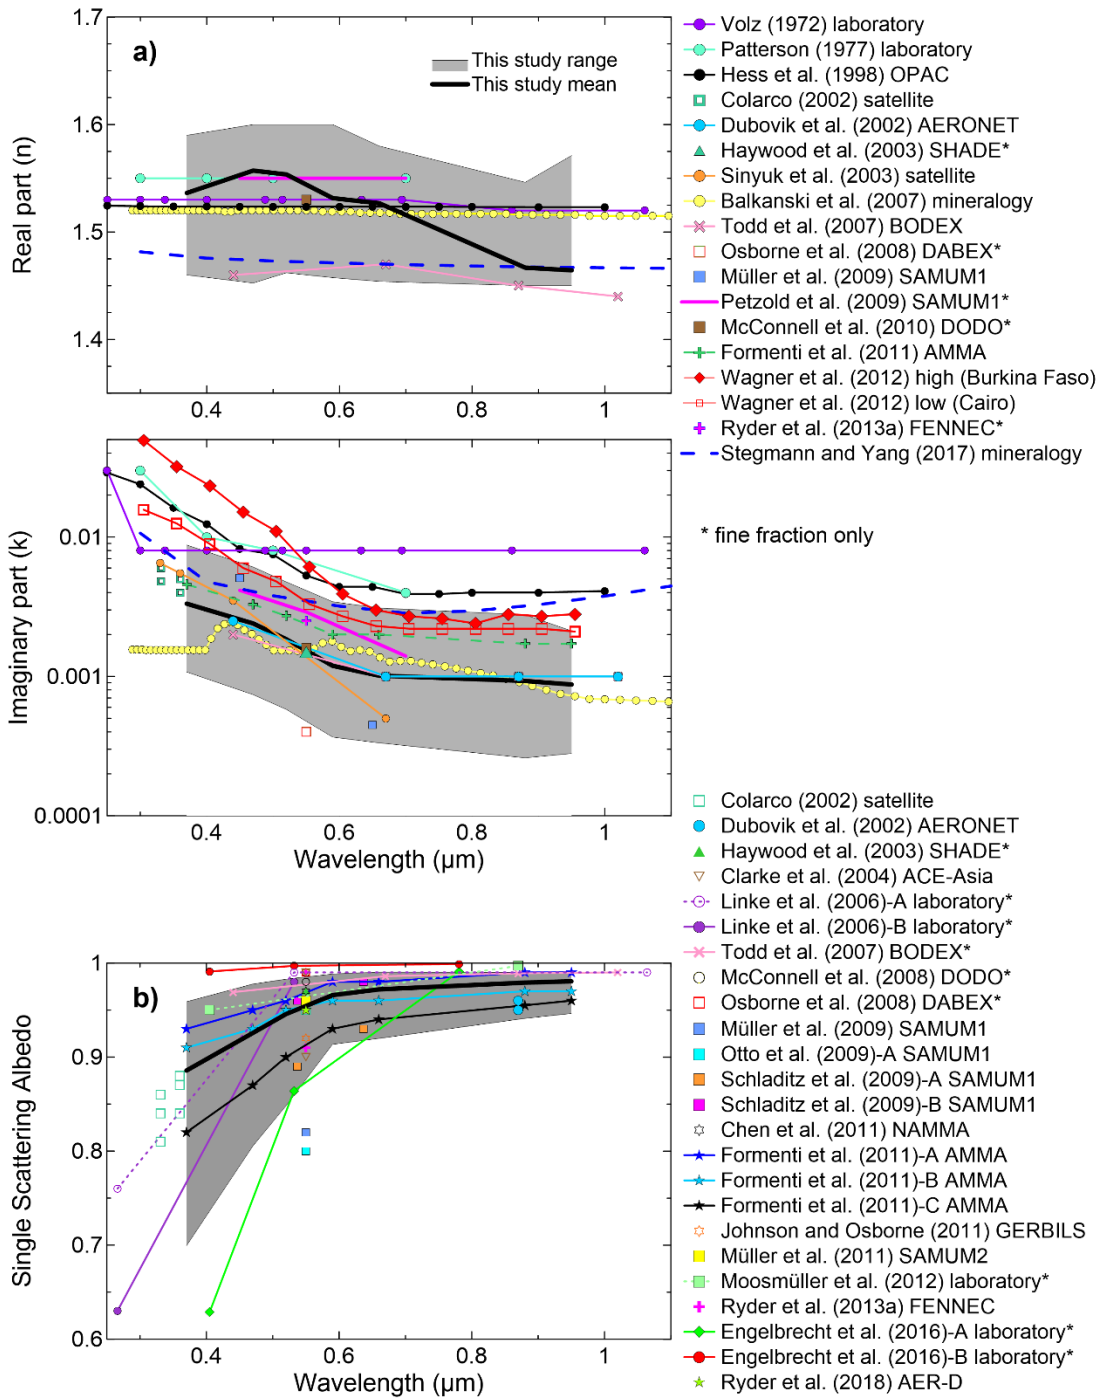

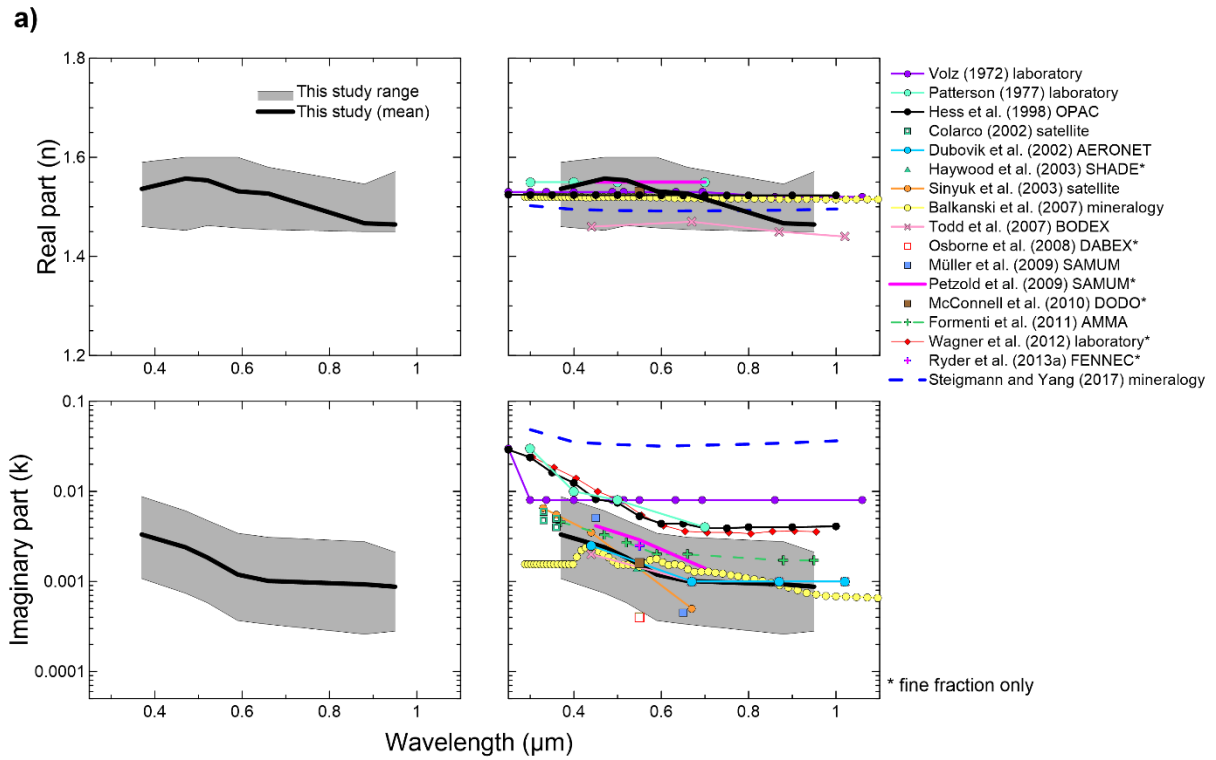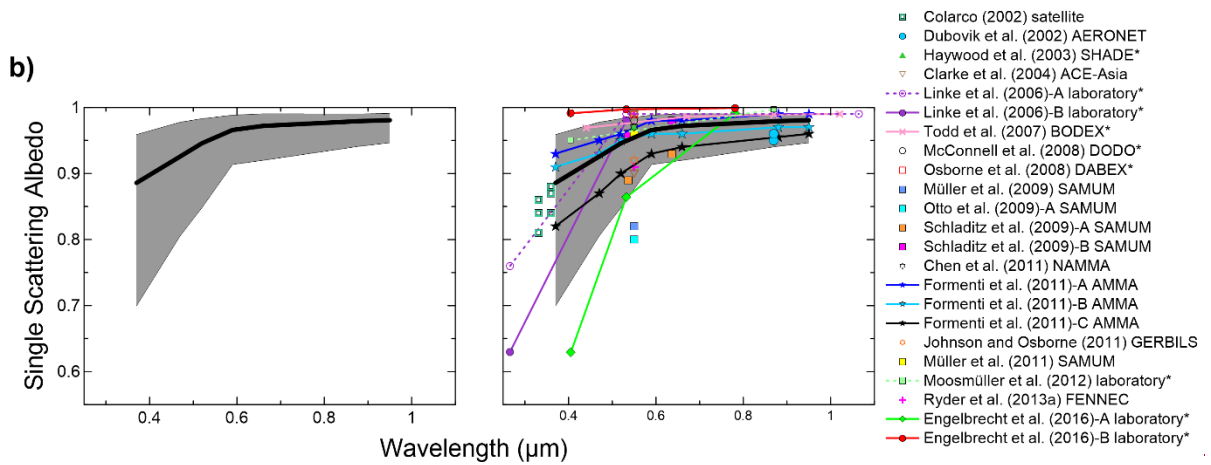

1499  
1500  
1501  
1502  
1503  
1504  
1505  
1506  
1507  
1508  
1509  
1510  
1511

1512 **Figure 98.** Experiment-averaged imaginary part of the refractive index ( $k$ , top panels) and single scattering  
 1513 albedo (SSA, bottom panels) at 370, 520, and 950 nm versus the mass concentration of iron  
 1514 oxides ( $MC_{Fe-ox\%}$ ), hematite ( $MC_{Hem\%}$ ), goethite ( $MC_{Goeth\%}$ ), and elemental iron ( $MC_{Fe\%}$ ) measured for  
 1515 the different dust samples analysed in this study. The calculated linear fit regression lines are shown,  
 1516 together with the correlation coefficients of the fits ( $R^2$ ). The legend indicates the line styles used in the  
 1517 plots. Data for the Taklimakan sample were excluded from the  $k$  and SSA plots versus  $MC_{Fe-ox\%}$ ,  
 1518  $MC_{Hem\%}$ , and  $MC_{Goeth\%}$  due to the absence of data for this sample.

1519  
 1520

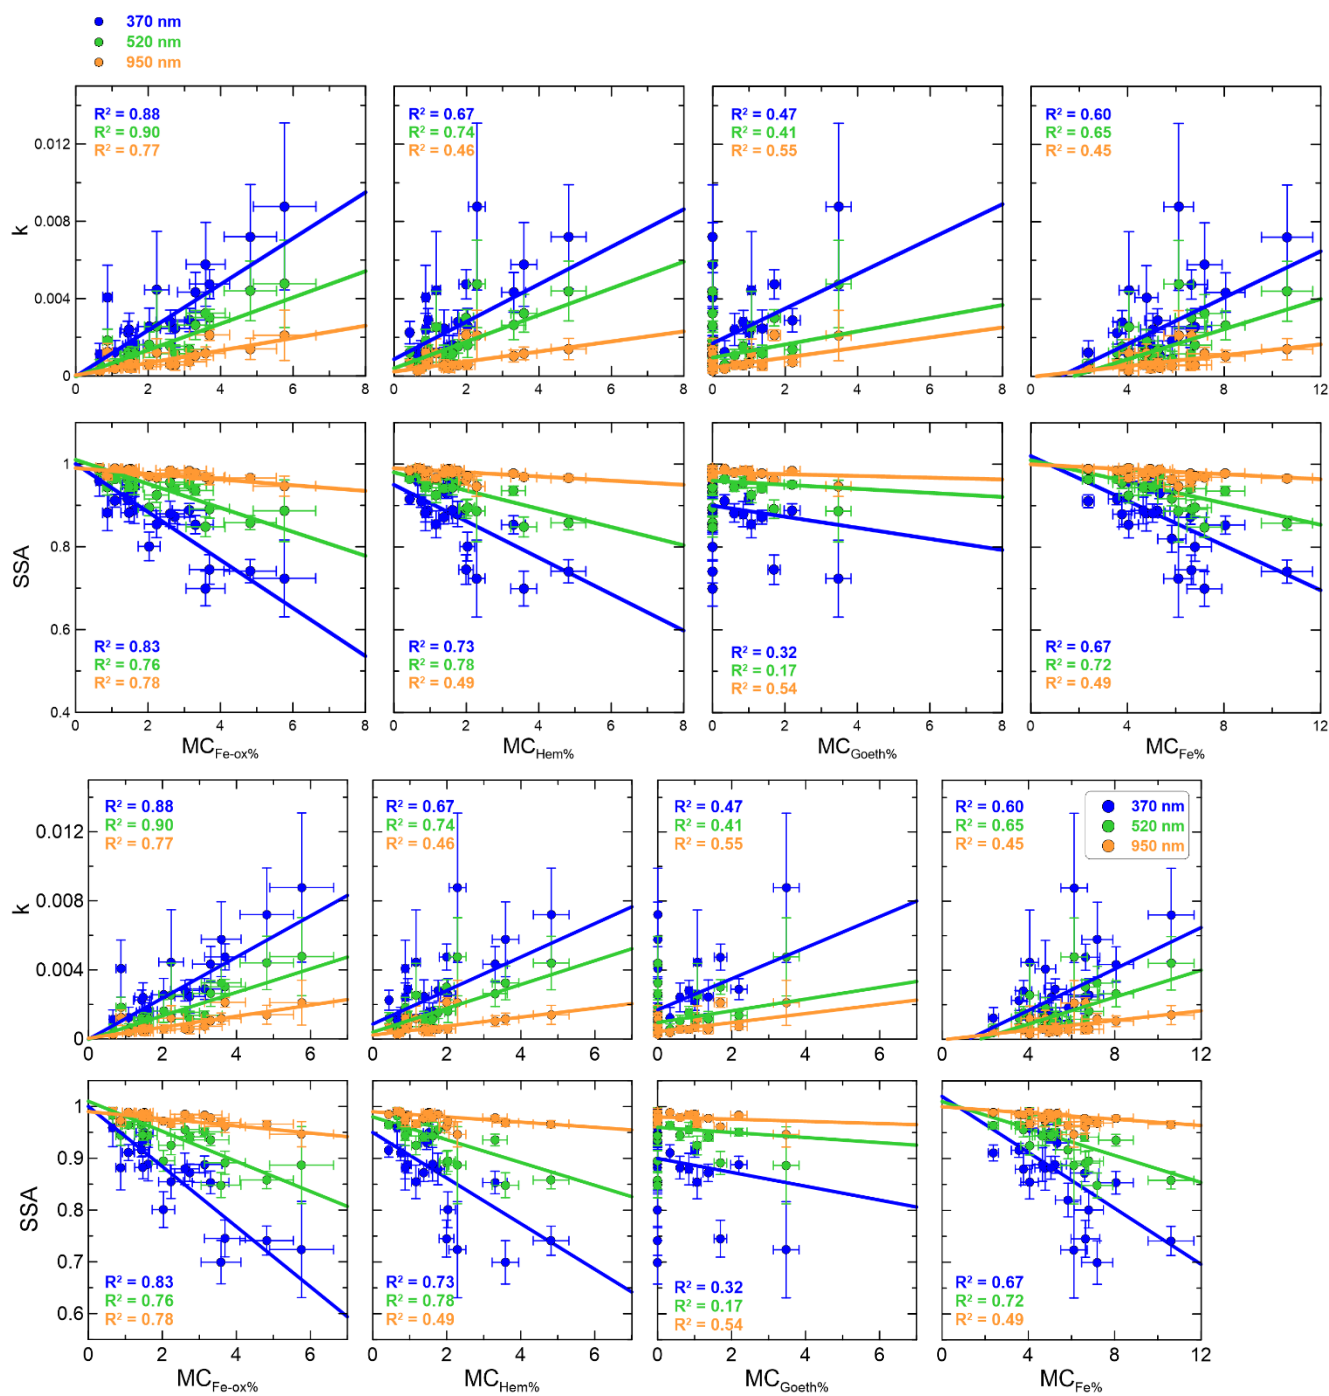

1521  
 1522

1523  
 1524



1525  
1526  
1527  
1528  
1529  
1530  
1531  
1532  
1533  
1534  
1535  
1536  
1537  
1538  
1539  
1540  
1541  
1542  
1543  
1544  
1545  
1546  
1547  
1548

**Figure 109.** 10-min averaged imaginary refractive index ( $k_{10\text{-min}}$ , top panels) and single scattering albedo ( $SSA_{10\text{-min}}$ , bottom panels) at 370, 520, and 950 nm versus effective coarse diameter ( $D_{\text{eff,coarse}}$ ) estimated at the input of the SW instruments. Data were classified in three classes based on the iron oxide content of the dust samples. The linear fit curves and the correlation coefficients for the linear regression fits for each dataset are also reported. The legend identifies the line styles used in the plots.

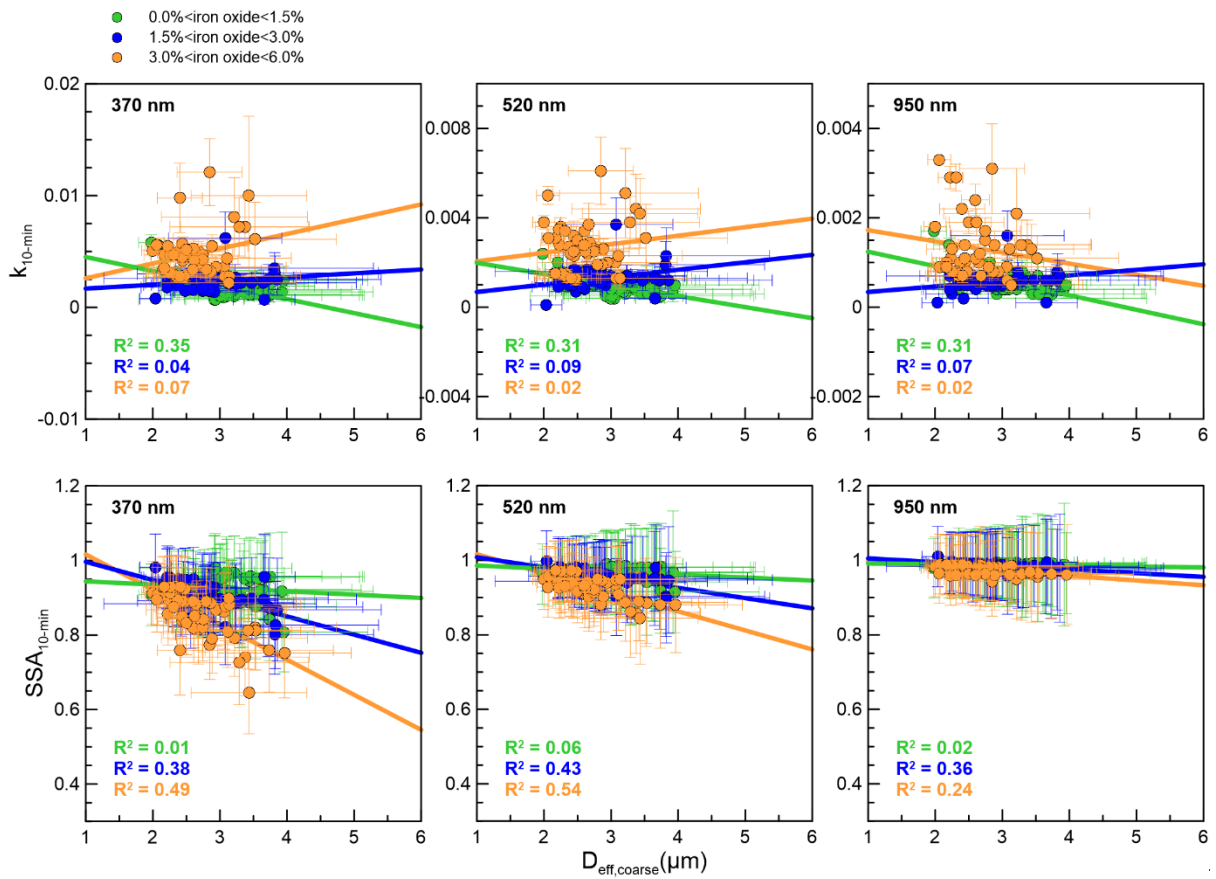

1549

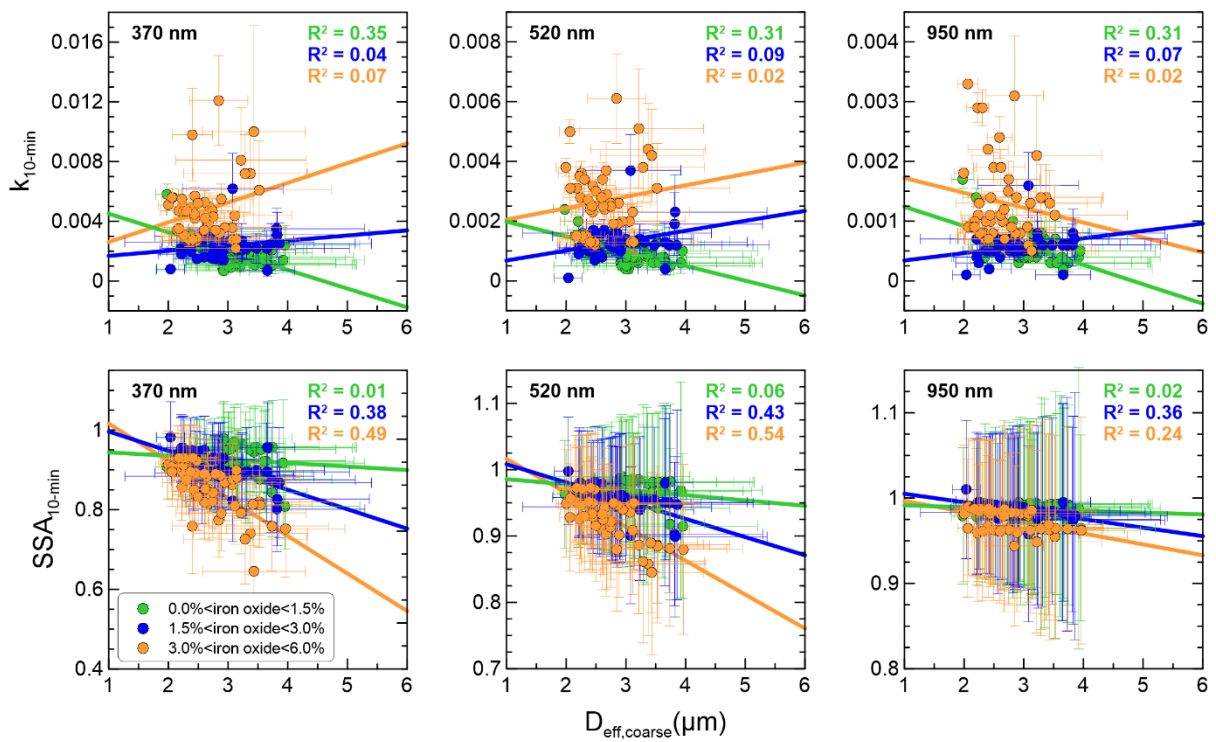

1550
